# Supplementary material for: The Histone Methyltransferase SETD8 Regulates the Expression of Tumor Suppressor Genes via H4K20 Methylation and the p53 Signaling Pathway in Endometrial Cancer Cells
Source: Cancers (Basel). 2022 Oct 31;14(21):5367. doi: 10.3390/cancers14215367 (PMC9655767; doi:10.3390/cancers14215367)
Supplement: Supplementary file 1 [file cancers-14-05367-s001.zip › cancers-1962511-Supplementary Tables.xlsx]

## Sheet: Supplementary Table S1
Supplementary Table S1. Freshly frozen clinical tissues utilized in this study
Uterine cancer (n=49)	Age (y.o.)	Pathology	Grade	Stage	pT	N	M	Relative SETD8 mRNA expression														Endometrium (n=4)	Age (y.o.)
1	44	Endometrioid adenocarcinoma with squamous differentiation	G1	Ⅱ	2	0	0	1.97247														1
2	31	Endometrioid adenocarcinoma	G1	ⅠA	1a	0	0	17.8353														2
3	66	Endometrioid adenocarcinoma	G1	ⅠA	1a	0	0	3.19688														3
4	72	Endometrioid adenocarcinoma	G1	Ⅱ	2	0	0	0.383767														4
6	63	Endometrioid adenocarcinoma	G1	ⅢC2	2	1	0	2.49666
9	45	Endometrioid adenocarcinoma with squamous differentiation	G1	ⅢC	2	1	0	2.86791
10	42	Endometrioid adenocarcinoma	G1	ⅠA	1a	0	0	1.27456
11	58	Endometrioid adenocarcinoma	G1	ⅠA	1a	0	0	0.968171
14	51	Endometrioid adenocarcinoma	G1	ⅠA	1a	0	0	4.14106
16	53	Endometrioid adenocarcinoma	G1	ⅢC2	1b	1	0	1.73708
18	60	Endometrioid adenocarcinoma	G1	ⅠB	1b	0	0	2.8219
20	64	Endometrioid adenocarcinoma	G1	ⅣB	3a	x	1	0.833161
23	59	Endometrioid adenocarcinoma	G1	ⅢC2	1b	1	0	49.6366
24	66	Endometrioid adenocarcinoma	G1	ⅢB	3b	0	0	5.82934
27	45	Endometrioid adenocarcinoma	G1	ⅣB	3b	x	1	1.97703
33	57	Endometrioid adenocarcinoma	G1	ⅢC1	1a	1	0	1.04247
41	48	Endometrioid adenocarcinoma	G1	Ⅱ	2a	0	0	2.86791
46	66	Endometrioid adenocarcinoma	G1	ⅢC	2b	1	0	1.45734
5	40	Endometrioid adenocarcinoma	G2	ⅠA	1a	0	0	7.98154
7	65	Endometrioid adenocarcinoma	G2	ⅠA	1a	0	0	5.80247
8	52	Endometrioid adenocarcinoma	G2	ⅠA	1a	0	0	6.52812
12	63	Endometrioid adenocarcinoma with squamous differentiation	G2	ⅢC	3b	1	0	0.773782
15	73	Endometrioid adenocarcinoma	G2	ⅠB	1b	0	0	4.85678
21	68	Endometrioid adenocarcinoma	G2	ⅠB	1b	0	0	5.45155
22	68	Endometrioid adenocarcinoma with squamous differentiation	G2	Ⅱ	2	0	0	0.833161
30	37	Endometrioid adenocarcinoma	G2	ⅠA	1a	0	0	1.74917
31	46	Endometrioid adenocarcinoma	G2	ⅠA	1a	0	0	3.08799
37	75	Endometrioid adenocarcinoma	G2	ⅢC2	3a	1	0	1.17283
38	48	Endometrioid adenocarcinoma with squamous differentiation	G2	Ⅱ	2	0	0	0.868541
39	64	Endometrioid adenocarcinoma	G2	ⅠB	1b	0	0	3.00355
44	67	Endometrioid adenocarcinoma	G2	ⅠB	1b	0	0	1.6245
48	71	Endometrioid adenocarcinoma	G2	ⅢC	3c	1	0	8.95897
13	48	Endometrioid adenocarcinoma	G3	ⅢC2	1b	1	0	1.35347
17	55	Endometrioid adenocarcinoma	G3	ⅠB	1b	0	0	1.28343
19	60	Endometrioid adenocarcinoma	G3	ⅠA	1a	0	0	1.75321
25	43	Endometrioid adenocarcinoma with squamous differentiation	G3	ⅠA	1a	0	0	1.56193
26	31	Endometrioid adenocarcinoma with squamous differentiation	G3	ⅠA	1a	0	0	4.60542
28	52	Endometrioid adenocarcinoma	G3	ⅢC1	1b	1	0	3.31728
29	56	Endometrioid adenocarcinoma	G3	ⅢC2	3	1	0	2.12874
32	66	Endometrioid adenocarcinoma	G3	ⅢC2	3a	1	0	0.656712
34	41	Endometrioid adenocarcinoma	G3	ⅢC2	1a	1	0	1.52274
35	42	Endometrioid adenocarcinoma	G3	Ⅱ	2	1	0	5.68305
36	51	Endometrioid adenocarcinoma	G3	ⅠB	1b	0	0	3.34808
40	44	Endometrioid adenocarcinoma	G3	ⅢC2	3a	1	0	2.16345
42	44	Endometrioid adenocarcinoma	G3	ⅣB	3c	1	1	0.692555
43	54	Endometrioid adenocarcinoma	G3	ⅠA	1a	0	0	1.68958
45	79	Endometrioid adenocarcinoma	G3	ⅠC	1c	0	0	1.00231
47	66	Endometrioid adenocarcinoma	G3	ⅢC	3b	1	0	3.97237
49	52	Endometrioid adenocarcinoma	G3	ⅠB	1b	0	0	2.97592

## Sheet: Supplementary Table S2
Supplementary Table S2. List of RT-PCR primers utilized in this study
Primers for RT-PCR		Sequence (5'→3')
ACTB	Forward	CACACTGTGCCCATCTACGA
	Reverse	CTCCTTAATGTCACGCACGA
SETD8	Forward	AAGAAACGGGAGGCTCTGTACG
	Reverse	TCTAGTTGCATCCACGCAGTAG
TP73	Forward	AAGGGGACGCAGCGAAAC
	Reverse	TCTGGTTCCAGAGAGCTCCA
KIAA1324	Forward	AGGCAAGCAGGAAGTACACC
	Reverse	AGGCCACGCCATTCATAACA

## Sheet: Supplementary Table S3
Supplementary Table S3. Sequence alignment of siRNAs utilized in this study
siRNA	Sense strand (5'→3')	Antisense strand(5'→3')	Company
NC	MISSION® siRNA Universal Negative Control #1		SIC001, Sigma-Aldrich
SETD8 #1	CCAUGAAGUCCGAGGAACA	UGUUCCUCGGACUUCAUGG	Sigma-Aldrich
SETD8 #2	GCAACUAGAGAGACAAAUC	GAUUUGUCUCUCUAGUUGC
SETD8 #3	CGAGGAACAGAAGAUCAAATT	UUUGAUCUUCUGUUCCUCGTT
SETD8 #4	GAUUGAAAGUGGGAAGGAA	UUCCUUCCCACUUUCAAUC

## Sheet: Supplementary Table S4 
Supplementary Table S4. List of antibodies used in this study
Primary antibodies	Source	Dilution	Company	Cat. no.	Application
anti-SETD8	rabbit	1:1000	Cell Signaling Technology	#2996	western blotting
anti-histone H4 (mono-methyl K20)	rabbit	1:2500	Abcam	ab9051	western blotting
anti-b-actin	mouse	1:7000	Sigma-Aldrich	A2228	western blotting
anti-cleaved PARP	rabbit	1:1000	Cell Signaling Technology	#5125	western blotting
anti-TP73	rabbit	1:1000	Abcam	ab40658	western blotting
anti-TP73	rabbit	1:200	Cell Signaling Technology	D3G10	Immunocytochemistry
Secondary antibodies	Source	Dilution	Company	Cat. no.	Application
Alexa Fluor 488	donkey anti-rabbit IgG (H+L)	1:500	Thermo Fisher Scientific	A-21206	Immunocytochemistry

## Sheet: Supplementary Table S5
Supplementary Table S5. List of ChIP-PCR primers utilized in this study
Primers for ChIP-PCR		Sequence (5'→3')
KIAA1324	Forward	CGAAAGGGCAGTAGAAAACG
	Reverse	GGCTCGTGTGAAGAACACAG
TP73	Forward	TGCTGCAGTGTAGGGTTCAG
	Reverse	TCCCTTCCTACCTCTGCTCA

## Sheet: Supplemetary Table S6A
Supplementary Table S6A. List of genes upregulated between HEC50B cells treated with negative control (NC) siRNA and SETD8 siRNA
Ensembl gene ID	logFC	logCPM	P-value	FDR
ENSG00000092929	3.38383	5.64765	1.39133e-31	2.49562e-27
ENSG00000114270	3.64659	7.487	1.59092e-30	1.1355e-26
ENSG00000184363	3.92742	2.22297	1.89915e-30	1.1355e-26
ENSG00000176907	2.37533	6.42035	3.01165e-30	1.3505e-26
ENSG00000141682	3.75427	4.94428	9.0113e-30	3.23271e-26
ENSG00000135925	3.9873	2.23074	6.9915e-28	2.09011e-24
ENSG00000120129	2.37596	4.68481	8.87404e-28	2.27391e-24
ENSG00000170477	5.0116	0.93398	1.14301e-26	2.1997e-23
ENSG00000118257	3.40302	3.63083	1.45701e-26	2.37586e-23
ENSG00000148926	2.58148	3.54621	6.1877e-26	8.5376e-23
ENSG00000111700	3.79823	2.02833	2.1826e-24	2.79638e-21
ENSG00000189120	3.02062	2.82336	4.708e-24	5.62983e-21
ENSG00000214049	4.76104	1.49909	5.90202e-23	6.61653e-20
ENSG00000163577	2.43892	5.022	1.02725e-21	1.08387e-18
ENSG00000013588	2.63751	4.80181	2.30679e-20	2.29871e-17
ENSG00000147573	3.25803	7.46	3.78582e-20	3.57402e-17
ENSG00000138347	4.07153	3.98091	7.32137e-20	6.56617e-17
ENSG00000073737	3.88501	3.53193	2.5381e-19	2.1679e-16
ENSG00000198576	2.93932	2.38959	4.5829e-19	3.73652e-16
ENSG00000081087	1.96897	6.10502	1.21262e-18	8.85729e-16
ENSG00000137868	4.89783	0.101795	1.2345e-18	8.85729e-16
ENSG00000110435	1.80668	5.59209	3.19164e-18	2.12032e-15
ENSG00000169252	2.51997	2.39957	3.54071e-18	2.2682e-15
ENSG00000076706	2.2357	6.77833	4.23718e-18	2.62077e-15
ENSG00000047457	2.07011	4.78596	5.12487e-18	3.06416e-15
ENSG00000196878	4.96187	4.09613	6.7338e-18	3.89627e-15
ENSG00000111424	2.49745	3.46347	1.63958e-17	9.19034e-15
ENSG00000204954	2.20537	3.70914	4.84501e-17	2.63348e-14
ENSG00000112139	3.95459	1.84155	5.06559e-17	2.6724e-14
ENSG00000166523	3.2986	2.55307	5.64246e-17	2.81883e-14
ENSG00000167767	2.83195	6.09157	5.65747e-17	2.81883e-14
ENSG00000171223	2.52501	4.89187	6.0112e-17	2.91413e-14
ENSG00000134668	2.51859	1.64758	8.44443e-17	3.98599e-14
ENSG00000128510	7.58399	3.45511	6.1e-16	4.94125e-14
ENSG00000123342	2.98755	2.65551	1.18394e-16	5.11078e-14
ENSG00000102218	2.03727	4.0807	1.1967e-16	5.11078e-14
ENSG00000087510	1.77273	4.62345	1.62222e-16	6.76692e-14
ENSG00000122861	3.24193	8.37399	2.33312e-16	9.51117e-14
ENSG00000011422	2.39674	5.36735	3.29893e-16	1.31495e-13
ENSG00000105246	2.93447	2.89801	4.22282e-16	1.64663e-13
ENSG00000231948	4.00323	1.35771	8.94995e-16	3.41564e-13
ENSG00000144452	2.89148	4.29111	9.37394e-16	3.50292e-13
ENSG00000124143	2.60497	1.49027	1.09259e-15	3.99955e-13
ENSG00000168505	1.88827	3.66296	1.67076e-15	5.99368e-13
ENSG00000006327	1.90707	7.12527	2.14725e-15	7.55201e-13
ENSG00000102854	3.46821	1.22507	2.21674e-15	7.64647e-13
ENSG00000121895	2.88727	3.54304	2.98135e-15	9.91716e-13
ENSG00000179674	3.71276	0.61369	2.9856e-15	9.91716e-13
ENSG00000227764	4.54624	0.788265	3.69814e-15	1.18453e-12
ENSG00000258245	3.44891	0.51683	4.18608e-15	1.31729e-12
ENSG00000261040	2.71524	4.2375	4.67626e-15	1.44618e-12
ENSG00000125726	1.74085	6.27242	4.85659e-15	1.47648e-12
ENSG00000130635	2.4225	3.06579	5.29583e-15	1.58319e-12
ENSG00000253525	2.11081	3.36839	6.77187e-15	1.99126e-12
ENSG00000099812	3.66732	4.27412	7.07887e-15	2.04796e-12
ENSG00000258077	2.77612	1.46997	9.89737e-15	2.77389e-12
ENSG00000187688	2.81122	5.01186	1.23628e-14	3.37983e-12
ENSG00000143162	1.9076	5.51155	1.24362e-14	3.37983e-12
ENSG00000243566	2.85259	3.09085	1.3012e-14	3.48352e-12
ENSG00000169398	1.45482	7.39671	1.32388e-14	3.49212e-12
ENSG00000142634	1.93734	5.44126	1.49682e-14	3.89108e-12
ENSG00000115380	1.51976	5.17714	2.25946e-14	5.70816e-12
ENSG00000118515	2.10451	5.05649	2.46088e-14	6.04669e-12
ENSG00000258088	3.03622	1.14574	2.51444e-14	6.07389e-12
ENSG00000150687	2.12646	7.23412	2.55193e-14	6.07389e-12
ENSG00000179841	1.94744	3.93127	2.5868e-14	6.07389e-12
ENSG00000204876	2.51072	2.58817	2.6074e-14	6.07389e-12
ENSG00000163710	2.25355	2.44452	2.71753e-14	6.24926e-12
ENSG00000176697	2.18378	4.6393	2.83149e-14	6.40024e-12
ENSG00000140853	2.5984	1.64772	2.85454e-14	6.40024e-12
ENSG00000135678	2.27718	6.33325	3.03801e-14	6.67643e-12
ENSG00000141429	1.73905	5.91429	3.05217e-14	6.67643e-12
ENSG00000132561	2.24277	4.16269	6.04034e-14	1.30537e-11
ENSG00000163803	2.52154	1.96859	7.82227e-14	1.67033e-11
ENSG00000165694	2.02035	3.34191	9.52132e-14	2.00922e-11
ENSG00000125740	2.76891	3.52786	1.08374e-13	2.26035e-11
ENSG00000134470	3.90165	0.589348	1.21316e-13	2.50121e-11
ENSG00000188937	4.21858	0.484073	1.522e-13	3.10228e-11
ENSG00000100342	5.52223	2.74564	1.69134e-13	3.40871e-11
ENSG00000160145	1.89449	3.63158	1.84377e-13	3.65785e-11
ENSG00000179111	3.33318	1.38245	1.85574e-13	3.65785e-11
ENSG00000187800	3.2557	2.24672	2.11081e-13	4.11538e-11
ENSG00000135480	3.15178	2.93516	2.33964e-13	4.49698e-11
ENSG00000222047	3.12448	0.503296	2.35667e-13	4.49698e-11
ENSG00000120875	2.03961	4.2265	2.435e-13	4.59754e-11
ENSG00000213626	3.30897	0.26767	2.47165e-13	4.61812e-11
ENSG00000065320	3.18183	3.11898	2.6345e-13	4.82195e-11
ENSG00000145012	2.43617	7.32324	3.13587e-13	5.68163e-11
ENSG00000233817	5.8335	0.749103	3.17539e-13	5.69569e-11
ENSG00000111331	2.35137	5.71284	3.28043e-13	5.82585e-11
ENSG00000198478	2.75955	0.354658	3.97845e-13	6.92829e-11
ENSG00000019582	2.43927	3.61166	4.412e-13	7.53696e-11
ENSG00000121797	2.6549	0.627631	5.24885e-13	8.88195e-11
ENSG00000133083	2.71694	4.39151	5.33466e-13	8.94279e-11
ENSG00000170689	1.97189	5.36338	6.04556e-13	9.93714e-11
ENSG00000170113	1.85852	5.55136	6.09403e-13	9.93714e-11
ENSG00000147234	3.23373	0.65383	7.08689e-13	1.12962e-10
ENSG00000168394	1.81237	4.62416	7.1164e-13	1.12962e-10
ENSG00000087494	3.00491	1.35656	8.53755e-13	1.33164e-10
ENSG00000260576	1.88348	2.75783	9.14071e-13	1.41342e-10
ENSG00000189068	4.51425	0.318636	1.01349e-12	1.55234e-10
ENSG00000136235	2.91765	2.58092	1.02122e-12	1.55234e-10
ENSG00000091622	2.06305	4.1495	1.05013e-12	1.58287e-10
ENSG00000075618	1.37723	7.32913	1.08333e-12	1.61931e-10
ENSG00000270002	4.12612	3.17506	1.25485e-12	1.86018e-10
ENSG00000108821	2.37165	10.3248	1.44004e-12	2.11722e-10
ENSG00000101680	1.71176	3.61985	1.46984e-12	2.14346e-10
ENSG00000168917	2.69646	3.5657	1.4864e-12	2.15013e-10
ENSG00000197971	2.39174	3.15791	1.5914e-12	2.28359e-10
ENSG00000080819	1.69188	4.8133	1.63352e-12	2.32543e-10
ENSG00000007237	3.53705	3.93851	1.65305e-12	2.33471e-10
ENSG00000118985	2.2238	2.74227	1.66931e-12	2.33925e-10
ENSG00000269976	4.0804	0.384124	1.71843e-12	2.38941e-10
ENSG00000143341	3.83263	3.46026	1.89586e-12	2.61584e-10
ENSG00000007264	3.21023	1.10533	2.0446e-12	2.79955e-10
ENSG00000125657	2.16918	5.73307	2.23431e-12	3.03612e-10
ENSG00000144810	2.93907	2.88446	2.46639e-12	3.32629e-10
ENSG00000227039	3.84043	2.10478	2.65537e-12	3.55443e-10
ENSG00000048052	2.28507	4.67881	2.74039e-12	3.64107e-10
ENSG00000180672	3.80333	0.737302	2.7693e-12	3.65242e-10
ENSG00000105971	2.25888	6.01981	2.9395e-12	3.8486e-10
ENSG00000213190	1.7674	5.08582	3.16408e-12	4.11261e-10
ENSG00000136842	3.11734	2.58206	3.53746e-12	4.56485e-10
ENSG00000112297	2.36558	2.20596	3.5631e-12	4.56509e-10
ENSG00000225383	3.45393	4.29724	3.60058e-12	4.5804e-10
ENSG00000146267	1.72774	3.21788	4.05556e-12	5.11272e-10
ENSG00000100311	1.8574	4.77723	4.22617e-12	5.22792e-10
ENSG00000109466	1.75287	4.16311	4.35669e-12	5.35246e-10
ENSG00000249992	2.23032	2.96173	4.64e-12	5.66174e-10
ENSG00000151062	4.24904	1.1504	4.82448e-12	5.84708e-10
ENSG00000185112	1.99049	2.83553	4.98023e-12	5.99304e-10
ENSG00000100522	1.56856	4.5298	5.01174e-12	5.99304e-10
ENSG00000140945	4.41334	3.53238	5.28427e-12	6.26347e-10
ENSG00000258586	4.00645	2.05653	5.32198e-12	6.26347e-10
ENSG00000140968	1.55459	3.97411	5.34265e-12	6.26347e-10
ENSG00000168243	1.82587	4.00049	6.32729e-12	7.36964e-10
ENSG00000171992	1.49395	6.19899	7.04221e-12	8.09718e-10
ENSG00000143473	2.46263	2.77498	7.81216e-12	8.89553e-10
ENSG00000128342	2.54592	5.92749	7.83573e-12	8.89553e-10
ENSG00000145287	1.87859	3.86246	8.93152e-12	1.00088e-09
ENSG00000095303	2.89183	3.37049	8.98375e-12	1.00088e-09
ENSG00000152332	1.86723	6.66526	1.00848e-11	1.11661e-09
ENSG00000178082	1.26407	5.87895	1.0646e-11	1.17152e-09
ENSG00000169247	1.95161	4.25809	1.17365e-11	1.28365e-09
ENSG00000162511	3.2294	3.4952	1.2853e-11	1.38882e-09
ENSG00000138378	2.73682	3.46919	1.30359e-11	1.40015e-09
ENSG00000115596	4.22299	1.18408	1.33812e-11	1.42869e-09
ENSG00000145040	3.88734	3.92556	1.41124e-11	1.49784e-09
ENSG00000131459	2.58751	4.00889	1.44717e-11	1.52693e-09
ENSG00000172548	3.34501	1.12739	1.56933e-11	1.63657e-09
ENSG00000180613	3.46623	-0.0967308	1.60765e-11	1.66684e-09
ENSG00000117226	3.66646	3.65394	1.6782e-11	1.72999e-09
ENSG00000185338	1.9761	2.78552	2.16942e-11	2.21096e-09
ENSG00000167772	2.40917	5.1363	2.21894e-11	2.24865e-09
ENSG00000128045	4.69951	2.47664	2.3428e-11	2.34765e-09
ENSG00000261559	1.33391	5.5934	2.44014e-11	2.4316e-09
ENSG00000078246	1.64526	4.77544	2.61481e-11	2.5795e-09
ENSG00000119048	1.39104	5.27863	2.61732e-11	2.5795e-09
ENSG00000122641	3.26681	2.24513	2.83913e-11	2.76769e-09
ENSG00000166401	2.53675	2.62879	2.87785e-11	2.79027e-09
ENSG00000253141	2.7543	0.699468	2.97341e-11	2.86743e-09
ENSG00000058085	2.11489	4.03241	2.9956e-11	2.87337e-09
ENSG00000082482	1.74181	3.43227	3.23621e-11	3.08766e-09
ENSG00000173918	2.18582	1.8449	3.27663e-11	3.10968e-09
ENSG00000165887	2.7655	0.671718	3.46189e-11	3.2682e-09
ENSG00000154319	2.10987	2.00945	3.54776e-11	3.33174e-09
ENSG00000176092	2.9315	1.96432	3.76797e-11	3.5201e-09
ENSG00000128965	2.23869	5.04802	3.88765e-11	3.61309e-09
ENSG00000022267	1.71934	4.52151	3.91838e-11	3.62289e-09
ENSG00000260903	2.7434	2.25671	4.04444e-11	3.72026e-09
ENSG00000182118	2.16656	3.05862	4.15237e-11	3.80005e-09
ENSG00000165434	3.03505	4.77359	4.65115e-11	4.21352e-09
ENSG00000177494	7.63626	-0.301466	4.77053e-11	4.29995e-09
ENSG00000101280	3.7737	0.233979	4.83673e-11	4.33782e-09
ENSG00000131979	1.95662	2.83358	5.86116e-11	5.20453e-09
ENSG00000142910	2.39815	6.82113	6.63603e-11	5.86357e-09
ENSG00000233901	1.9691	1.67131	7.02482e-11	6.17668e-09
ENSG00000082497	4.03935	2.13677	8.0071e-11	7.00602e-09
ENSG00000137460	1.35641	4.47277	8.3334e-11	7.25613e-09
ENSG00000177335	2.89716	1.19384	8.69933e-11	7.46602e-09
ENSG00000156017	1.9495	4.30685	8.76144e-11	7.48352e-09
ENSG00000113946	2.21633	5.84546	8.86333e-11	7.53467e-09
ENSG00000106789	1.82837	2.13033	1.00559e-10	8.5081e-09
ENSG00000135362	1.50601	3.18857	1.13459e-10	9.50986e-09
ENSG00000146232	1.39589	4.60714	1.27189e-10	1.05931e-08
ENSG00000171435	2.34168	1.30874	1.27564e-10	1.05931e-08
ENSG00000174130	2.18102	3.47303	1.32881e-10	1.09046e-08
ENSG00000166741	1.82787	7.56305	1.33139e-10	1.09046e-08
ENSG00000134531	3.76508	5.28039	1.5436e-10	1.25853e-08
ENSG00000128016	1.6626	3.80364	1.66193e-10	1.34279e-08
ENSG00000049249	2.90223	1.43541	1.69825e-10	1.35989e-08
ENSG00000136826	1.90992	2.54043	1.7104e-10	1.36353e-08
ENSG00000168528	2.34118	3.33922	1.79061e-10	1.42116e-08
ENSG00000163293	2.70529	1.12433	1.8343e-10	1.44942e-08
ENSG00000143367	1.34816	4.50717	2.08497e-10	1.64027e-08
ENSG00000177425	1.62221	5.44567	2.17188e-10	1.69379e-08
ENSG00000254300	3.4297	2.90778	2.42439e-10	1.87441e-08
ENSG00000167900	1.20159	8.45022	2.5338e-10	1.95059e-08
ENSG00000152137	1.60712	4.8915	2.70166e-10	2.07093e-08
ENSG00000109452	3.27578	0.448955	2.73068e-10	2.08427e-08
ENSG00000175592	1.92832	7.25392	2.9551e-10	2.246e-08
ENSG00000221890	2.5118	6.15533	3.0911e-10	2.32944e-08
ENSG00000008441	1.43825	2.96687	3.10384e-10	2.32944e-08
ENSG00000104951	3.53405	3.64661	3.34521e-10	2.48975e-08
ENSG00000158555	1.57842	6.00794	3.36804e-10	2.49639e-08
ENSG00000152779	4.39674	2.99328	3.47156e-10	2.56253e-08
ENSG00000162772	1.86179	4.90351	3.61266e-10	2.64491e-08
ENSG00000170381	2.25359	2.93514	4.57907e-10	3.33881e-08
ENSG00000227295	2.24156	2.35449	5.01919e-10	3.64491e-08
ENSG00000111799	2.04631	6.61255	5.14493e-10	3.72115e-08
ENSG00000177469	1.63954	6.9139	5.48934e-10	3.95431e-08
ENSG00000136052	1.49963	3.41321	5.83762e-10	4.17169e-08
ENSG00000171051	2.49744	1.80553	5.99339e-10	4.26601e-08
ENSG00000173227	2.74614	3.43245	6.28202e-10	4.45378e-08
ENSG00000137819	1.53711	3.71134	6.50045e-10	4.59049e-08
ENSG00000018408	1.59738	7.06003	6.68917e-10	4.70524e-08
ENSG00000135905	1.27259	4.51967	6.87129e-10	4.79605e-08
ENSG00000124216	2.06273	4.53179	6.87175e-10	4.79605e-08
ENSG00000126803	1.33228	6.64451	6.91471e-10	4.80733e-08
ENSG00000130176	3.82718	0.524095	7.01306e-10	4.85689e-08
ENSG00000123989	1.45087	5.96154	7.89885e-10	5.42841e-08
ENSG00000173846	1.65407	3.29375	8.12663e-10	5.54249e-08
ENSG00000128283	1.32644	6.70214	8.20059e-10	5.57174e-08
ENSG00000247844	3.03845	0.357751	8.38507e-10	5.67559e-08
ENSG00000124249	2.8875	-0.0192346	8.70495e-10	5.86995e-08
ENSG00000257642	2.46603	2.63099	9.30129e-10	6.24858e-08
ENSG00000105696	2.36492	2.05828	9.39487e-10	6.2879e-08
ENSG00000179388	2.82558	0.860614	9.8662e-10	6.57881e-08
ENSG00000142173	1.68045	5.12092	1.02756e-09	6.82639e-08
ENSG00000139269	1.91758	2.87049	1.19233e-09	7.89184e-08
ENSG00000171246	2.61362	0.906336	1.2584e-09	8.29851e-08
ENSG00000236453	3.48067	1.91782	1.29417e-09	8.50314e-08
ENSG00000236366	7.70968	0.219342	1.30426e-09	8.53813e-08
ENSG00000202198	3.98563	3.1184	1.32164e-09	8.62046e-08
ENSG00000108813	1.90566	3.50238	1.32655e-09	8.62115e-08
ENSG00000159167	3.00641	5.93589	1.33582e-09	8.6488e-08
ENSG00000103089	3.03174	3.83845	1.34838e-09	8.66879e-08
ENSG00000074527	2.10591	3.61	1.36174e-09	8.72338e-08
ENSG00000130766	1.50765	6.16277	1.36668e-09	8.7239e-08
ENSG00000188910	3.95112	-0.00635403	1.42051e-09	9.03534e-08
ENSG00000224596	2.50103	2.29916	1.45657e-09	9.23198e-08
ENSG00000106366	3.28	4.88432	1.46855e-09	9.27037e-08
ENSG00000105929	7.9292	0.204144	1.47296e-09	9.27037e-08
ENSG00000153294	4.05872	0.759307	1.49678e-09	9.3873e-08
ENSG00000145911	1.91216	1.63736	1.61557e-09	1.00971e-07
ENSG00000171608	1.61789	3.69775	1.63317e-09	1.01716e-07
ENSG00000153292	2.63171	1.62112	1.74704e-09	1.08431e-07
ENSG00000171236	3.06054	0.882507	1.76306e-09	1.09048e-07
ENSG00000229656	1.98919	3.28414	1.78903e-09	1.10242e-07
ENSG00000067840	2.15853	3.31987	1.82394e-09	1.11659e-07
ENSG00000172717	2.51416	0.0864454	1.87777e-09	1.14563e-07
ENSG00000124508	1.27024	4.58654	1.92806e-09	1.17232e-07
ENSG00000182389	2.81326	-0.00750663	2.0911e-09	1.26716e-07
ENSG00000137571	2.18246	2.75208	2.15528e-09	1.30166e-07
ENSG00000130208	1.67185	4.47595	2.23201e-09	1.3368e-07
ENSG00000119283	3.41278	0.677922	2.23582e-09	1.3368e-07
ENSG00000185640	4.52064	0.363057	2.24633e-09	1.33862e-07
ENSG00000272520	1.62828	3.63676	2.36838e-09	1.40668e-07
ENSG00000230812	7.32729	-0.37937	2.39035e-09	1.41504e-07
ENSG00000156804	3.66248	5.09463	2.45587e-09	1.43957e-07
ENSG00000150593	1.72527	5.43345	2.49151e-09	1.45486e-07
ENSG00000152784	1.88629	2.78873	2.49817e-09	1.45486e-07
ENSG00000135074	1.73669	4.41478	2.54693e-09	1.47846e-07
ENSG00000144834	2.34197	3.22623	2.73351e-09	1.58165e-07
ENSG00000155760	1.85751	4.05688	2.80571e-09	1.6182e-07
ENSG00000197769	2.54637	1.60459	2.8855e-09	1.65889e-07
ENSG00000133636	1.89823	1.51024	3.05124e-09	1.74857e-07
ENSG00000171132	1.70024	4.78131	3.22751e-09	1.84369e-07
ENSG00000183688	1.49604	5.69447	3.24622e-09	1.84849e-07
ENSG00000248394	1.99563	4.66468	3.28362e-09	1.86387e-07
ENSG00000136250	4.23487	-0.21439	3.37735e-09	1.90502e-07
ENSG00000234883	1.75016	1.92453	3.49048e-09	1.96266e-07
ENSG00000204362	3.43077	1.74316	4.38692e-09	2.44373e-07
ENSG00000105290	1.799	5.41545	4.77756e-09	2.6531e-07
ENSG00000198797	2.73084	1.67312	5.07404e-09	2.80904e-07
ENSG00000116741	2.38308	3.32845	5.27192e-09	2.90961e-07
ENSG00000144063	4.35724	-0.472261	5.3743e-09	2.95702e-07
ENSG00000105810	1.5767	6.10749	5.45847e-09	2.98759e-07
ENSG00000141526	2.78692	4.89955	5.46317e-09	2.98759e-07
ENSG00000181773	1.56251	3.5056	5.74222e-09	3.12116e-07
ENSG00000095752	5.59064	5.07382	5.93378e-09	3.21553e-07
ENSG00000127325	2.5067	3.08257	6.07159e-09	3.27276e-07
ENSG00000226887	1.58811	4.93649	6.07587e-09	3.27276e-07
ENSG00000163132	1.6369	3.10687	6.50727e-09	3.4842e-07
ENSG00000167601	2.11203	8.61032	6.56315e-09	3.49459e-07
ENSG00000164616	1.53302	2.55672	6.56563e-09	3.49459e-07
ENSG00000092969	1.63168	5.90677	6.90482e-09	3.66425e-07
ENSG00000156265	2.96474	1.11046	7.05482e-09	3.73281e-07
ENSG00000197261	2.16437	0.49573	7.12303e-09	3.74939e-07
ENSG00000146666	5.91888	0.0147849	7.12796e-09	3.74939e-07
ENSG00000128849	1.73318	5.37323	7.66053e-09	4.01775e-07
ENSG00000182752	3.11827	0.448458	8.13849e-09	4.24361e-07
ENSG00000176406	5.42189	1.10684	8.25126e-09	4.28994e-07
ENSG00000130720	2.30783	0.898498	8.27748e-09	4.29113e-07
ENSG00000134545	5.14632	1.0425	8.46657e-09	4.37651e-07
ENSG00000130513	2.2101	8.28624	8.72601e-09	4.49765e-07
ENSG00000171450	2.48099	0.412121	8.79194e-09	4.51866e-07
ENSG00000140545	1.30224	8.64775	8.90816e-09	4.5653e-07
ENSG00000158525	3.47634	-0.0704709	9.06132e-09	4.63057e-07
ENSG00000124126	1.16728	4.4746	9.11744e-09	4.64601e-07
ENSG00000177138	2.13002	0.607073	1.03413e-08	5.23987e-07
ENSG00000188761	3.94068	0.358847	1.03874e-08	5.24842e-07
ENSG00000171522	2.38505	0.2121	1.05934e-08	5.33016e-07
ENSG00000259374	1.96908	0.664323	1.08644e-08	5.42824e-07
ENSG00000180720	2.88182	0.517156	1.13692e-08	5.6647e-07
ENSG00000175906	2.04651	4.45067	1.15005e-08	5.71427e-07
ENSG00000127129	5.23034	0.396017	1.1882e-08	5.8875e-07
ENSG00000008735	2.75553	2.40483	1.2164e-08	6.0106e-07
ENSG00000226973	2.49035	2.34806	1.24461e-08	6.1296e-07
ENSG00000074590	1.48619	5.28339	1.24731e-08	6.1296e-07
ENSG00000182379	1.5855	3.81124	1.25572e-08	6.15405e-07
ENSG00000115648	1.45039	7.07975	1.26603e-08	6.18769e-07
ENSG00000040608	1.55382	3.8383	1.29147e-08	6.29413e-07
ENSG00000186854	2.29918	0.0718274	1.29483e-08	6.29413e-07
ENSG00000185015	1.81526	4.28108	1.35458e-08	6.56679e-07
ENSG00000113389	2.4137	-0.418494	1.45399e-08	7.02969e-07
ENSG00000125354	1.35176	2.92761	1.49182e-08	7.19322e-07
ENSG00000138678	1.12147	6.00119	1.70728e-08	8.21006e-07
ENSG00000135046	1.41868	9.35891	1.74288e-08	8.33654e-07
ENSG00000232480	2.39604	2.19113	1.75367e-08	8.36585e-07
ENSG00000064195	4.62931	0.0171442	1.88148e-08	8.90452e-07
ENSG00000253282	4.55762	-0.242671	1.8997e-08	8.96708e-07
ENSG00000006016	2.49626	2.99409	1.92395e-08	9.05773e-07
ENSG00000167034	2.70488	-0.24145	2.04299e-08	9.59295e-07
ENSG00000170345	1.82599	3.42171	2.08336e-08	9.75699e-07
ENSG00000135776	1.80794	3.5124	2.26382e-08	1.0547e-06
ENSG00000137825	1.95941	1.94821	2.27351e-08	1.05648e-06
ENSG00000251322	1.61296	2.43387	2.29674e-08	1.06451e-06
ENSG00000143512	2.19925	3.77186	2.37208e-08	1.0966e-06
ENSG00000029534	1.49515	4.39056	2.42412e-08	1.11778e-06
ENSG00000136153	1.10988	6.19447	2.4483e-08	1.12603e-06
ENSG00000169139	1.25132	4.31236	2.56061e-08	1.17467e-06
ENSG00000162873	3.9722	0.918829	2.63824e-08	1.2072e-06
ENSG00000163171	1.41385	4.73391	2.64812e-08	1.20863e-06
ENSG00000099139	3.40149	1.28041	2.68401e-08	1.2219e-06
ENSG00000145391	2.16569	6.31643	2.71075e-08	1.23095e-06
ENSG00000138622	2.3846	0.846787	2.76006e-08	1.25018e-06
ENSG00000179820	1.26694	7.39419	2.86399e-08	1.29399e-06
ENSG00000196843	1.70453	2.76957	2.88402e-08	1.29977e-06
ENSG00000232110	1.47873	1.94877	2.91916e-08	1.31231e-06
ENSG00000169067	5.07584	-0.596823	2.93612e-08	1.31663e-06
ENSG00000073803	1.21019	4.22066	2.96154e-08	1.32472e-06
ENSG00000112561	2.41312	0.786652	2.97186e-08	1.32603e-06
ENSG00000164161	2.12983	2.01094	3.05694e-08	1.36061e-06
ENSG00000176692	2.08452	0.930257	3.12405e-08	1.38703e-06
ENSG00000116299	3.66719	2.88082	3.43817e-08	1.52273e-06
ENSG00000026508	1.96189	8.87018	3.51481e-08	1.55284e-06
ENSG00000146374	2.99898	0.438274	3.56698e-08	1.57201e-06
ENSG00000136167	4.83489	4.1594	3.68351e-08	1.61258e-06
ENSG00000104783	4.09648	1.03939	3.68601e-08	1.61258e-06
ENSG00000116661	1.31792	3.33672	3.96067e-08	1.72853e-06
ENSG00000163499	2.10537	0.624616	4.03409e-08	1.7563e-06
ENSG00000136275	3.41521	1.32156	4.04549e-08	1.75699e-06
ENSG00000260604	3.61699	0.818634	4.0845e-08	1.76553e-06
ENSG00000122176	2.02039	1.25489	4.12384e-08	1.77789e-06
ENSG00000180855	1.25325	3.20972	4.13566e-08	1.77789e-06
ENSG00000146733	1.03336	6.4283	4.14316e-08	1.77789e-06
ENSG00000144821	7.59615	0.0679841	4.17283e-08	1.78353e-06
ENSG00000185499	1.2873	4.05395	4.17619e-08	1.78353e-06
ENSG00000133985	2.00755	1.63345	4.2116e-08	1.79013e-06
ENSG00000103196	1.86673	3.28634	4.28255e-08	1.81598e-06
ENSG00000105464	1.70471	3.1074	4.30013e-08	1.81914e-06
ENSG00000148841	1.3961	4.7634	4.3731e-08	1.84566e-06
ENSG00000172986	1.53497	2.17435	4.39763e-08	1.85165e-06
ENSG00000100628	3.07989	1.03327	4.47159e-08	1.87399e-06
ENSG00000166448	4.80243	-0.0421794	4.73923e-08	1.98153e-06
ENSG00000177679	1.92278	2.4408	5.07403e-08	2.11167e-06
ENSG00000189052	4.73981	0.224606	5.36134e-08	2.22607e-06
ENSG00000128917	2.8008	-0.015042	5.5456e-08	2.28146e-06
ENSG00000185565	2.0357	4.76706	5.57776e-08	2.28944e-06
ENSG00000172115	1.18169	7.22615	5.73841e-08	2.35e-06
ENSG00000182240	2.24522	0.407598	5.77011e-08	2.3576e-06
ENSG00000158887	3.06472	0.762225	5.88689e-08	2.39985e-06
ENSG00000136999	3.12036	2.18832	5.95643e-08	2.42269e-06
ENSG00000230882	2.19949	3.71833	6.01382e-08	2.44049e-06
ENSG00000158683	2.46792	0.734928	6.03697e-08	2.44436e-06
ENSG00000118407	3.10332	1.61522	6.08157e-08	2.45687e-06
ENSG00000234233	1.70442	1.29086	6.12178e-08	2.46756e-06
ENSG00000113595	1.20585	3.91484	6.30109e-08	2.53354e-06
ENSG00000183049	2.04752	0.992114	6.31373e-08	2.53354e-06
ENSG00000170500	1.95438	2.44128	6.38242e-08	2.55539e-06
ENSG00000213977	1.17687	4.6649	6.51264e-08	2.60172e-06
ENSG00000196352	1.09781	4.94154	6.55723e-08	2.61371e-06
ENSG00000155850	1.46186	6.6296	6.58447e-08	2.61875e-06
ENSG00000185022	1.63982	3.80663	6.74992e-08	2.67861e-06
ENSG00000196337	2.85552	0.251016	6.93003e-08	2.74402e-06
ENSG00000095383	1.7389	4.92974	6.98407e-08	2.75932e-06
ENSG00000099860	2.92827	4.11199	7.18101e-08	2.8309e-06
ENSG00000230943	3.41007	-0.689892	7.22408e-08	2.84163e-06
ENSG00000164181	1.32568	4.59095	7.2865e-08	2.85991e-06
ENSG00000248890	2.3516	0.423051	7.3425e-08	2.87107e-06
ENSG00000258010	3.64616	0.71365	7.34695e-08	2.87107e-06
ENSG00000108691	2.47812	1.5313	7.67868e-08	2.98769e-06
ENSG00000118194	3.17665	0.708981	8.11901e-08	3.15218e-06
ENSG00000128340	2.57042	0.968392	8.50355e-08	3.28017e-06
ENSG00000176678	3.25662	1.10273	8.61523e-08	3.31345e-06
ENSG00000124134	2.62599	-0.08591	8.6512e-08	3.31574e-06
ENSG00000163291	1.37501	5.65444	8.7431e-08	3.34382e-06
ENSG00000175352	2.41289	2.85885	8.87016e-08	3.38519e-06
ENSG00000137267	1.4642	6.21955	9.0463e-08	3.42778e-06
ENSG00000156011	1.50943	4.90577	9.05819e-08	3.42778e-06
ENSG00000135272	1.4188	5.00708	9.09608e-08	3.43415e-06
ENSG00000142619	2.81967	1.50083	9.11741e-08	3.43415e-06
ENSG00000167779	1.94343	3.66193	9.13246e-08	3.43415e-06
ENSG00000137673	2.35884	0.779455	9.49589e-08	3.54849e-06
ENSG00000166473	2.614	1.99955	1.00142e-07	3.73439e-06
ENSG00000100055	3.91332	0.941619	1.01854e-07	3.78423e-06
ENSG00000104856	1.61816	4.60054	1.019e-07	3.78423e-06
ENSG00000171388	4.05118	2.78084	1.03408e-07	3.83228e-06
ENSG00000224419	1.73764	1.74337	1.04314e-07	3.84996e-06
ENSG00000253968	1.76066	1.27111	1.06901e-07	3.93732e-06
ENSG00000213078	1.2373	4.06976	1.07473e-07	3.95031e-06
ENSG00000134516	3.40772	2.46492	1.10825e-07	4.06519e-06
ENSG00000182759	2.67504	0.997285	1.1361e-07	4.15884e-06
ENSG00000162813	1.05653	6.24604	1.15504e-07	4.21952e-06
ENSG00000240476	1.59481	4.73164	1.17318e-07	4.27711e-06
ENSG00000198087	1.2463	6.61023	1.18052e-07	4.29515e-06
ENSG00000134013	1.53201	7.71531	1.19709e-07	4.34661e-06
ENSG00000198805	1.02377	6.47252	1.23833e-07	4.48724e-06
ENSG00000152749	1.08119	6.19789	1.26667e-07	4.57149e-06
ENSG00000187210	1.38042	4.5434	1.30514e-07	4.70086e-06
ENSG00000205744	2.0028	2.27584	1.31241e-07	4.71756e-06
ENSG00000223599	1.53277	5.02866	1.31547e-07	4.71913e-06
ENSG00000163359	3.07545	3.5657	1.3685e-07	4.89516e-06
ENSG00000120708	1.51279	9.05517	1.37e-07	4.89516e-06
ENSG00000107954	2.09367	0.582294	1.37768e-07	4.91283e-06
ENSG00000133789	1.16842	5.94866	1.38987e-07	4.94643e-06
ENSG00000240065	2.44278	1.88438	1.4023e-07	4.98079e-06
ENSG00000237194	1.94396	1.99963	1.42712e-07	5.05895e-06
ENSG00000078900	1.51713	2.7958	1.4313e-07	5.06376e-06
ENSG00000026103	1.15321	4.58401	1.4422e-07	5.0723e-06
ENSG00000139329	2.62902	2.44955	1.54197e-07	5.40201e-06
ENSG00000075461	1.84995	3.10775	1.55627e-07	5.44148e-06
ENSG00000134258	4.93858	0.271075	1.58249e-07	5.51426e-06
ENSG00000117906	1.24909	6.044	1.58323e-07	5.51426e-06
ENSG00000131981	1.60526	4.67273	1.59405e-07	5.54119e-06
ENSG00000255198	1.50067	3.18161	1.67807e-07	5.82197e-06
ENSG00000253190	4.30914	0.240918	1.68326e-07	5.8287e-06
ENSG00000184992	1.0377	5.95075	1.69138e-07	5.84554e-06
ENSG00000031691	1.47259	4.2421	1.71854e-07	5.92797e-06
ENSG00000078269	1.02115	6.32831	1.72982e-07	5.95541e-06
ENSG00000174083	3.86802	-0.473509	1.74284e-07	5.98877e-06
ENSG00000155329	1.37955	4.05471	1.75287e-07	6.01172e-06
ENSG00000094804	1.21609	7.09336	1.81959e-07	6.21676e-06
ENSG00000105499	1.51949	1.75341	1.86605e-07	6.3513e-06
ENSG00000166803	1.35433	6.7717	1.94347e-07	6.60229e-06
ENSG00000142627	1.11277	7.47297	1.94816e-07	6.60569e-06
ENSG00000149043	3.76083	0.19137	1.95197e-07	6.60613e-06
ENSG00000121297	1.30401	2.28812	2.01881e-07	6.81946e-06
ENSG00000237515	2.54761	4.96795	2.06387e-07	6.94552e-06
ENSG00000165685	1.85773	4.64654	2.11305e-07	7.08443e-06
ENSG00000120756	1.57716	5.71759	2.16867e-07	7.25735e-06
ENSG00000173391	2.42441	2.73308	2.17309e-07	7.25861e-06
ENSG00000139278	1.82798	2.08109	2.29863e-07	7.63529e-06
ENSG00000259689	1.98626	1.89337	2.67043e-07	8.83755e-06
ENSG00000163131	2.80623	0.398349	2.73758e-07	9.03873e-06
ENSG00000110446	4.32043	0.0640623	2.7413e-07	9.03873e-06
ENSG00000140678	1.90355	4.00488	2.80759e-07	9.24031e-06
ENSG00000113140	1.08027	10.1678	2.84883e-07	9.35888e-06
ENSG00000077585	1.17162	4.54382	2.85835e-07	9.37298e-06
ENSG00000132965	7.62146	-0.207218	2.86447e-07	9.37591e-06
ENSG00000196562	1.8517	0.962399	2.9639e-07	9.68368e-06
ENSG00000166710	1.0795	8.67417	3.03473e-07	9.89708e-06
ENSG00000124762	1.67774	6.80506	3.06556e-07	9.97949e-06
ENSG00000084636	3.73915	0.713191	3.14864e-07	1.02314e-05
ENSG00000203706	4.23728	-0.462002	3.26454e-07	1.05888e-05
ENSG00000130881	1.65122	2.87366	3.29062e-07	1.06541e-05
ENSG00000244588	3.76016	1.01309	3.31206e-07	1.07042e-05
ENSG00000185386	1.14877	4.20541	3.35563e-07	1.08255e-05
ENSG00000116544	2.07548	2.25514	3.44893e-07	1.11065e-05
ENSG00000162366	1.42677	4.7199	3.48766e-07	1.12111e-05
ENSG00000087085	2.70298	0.59685	3.63054e-07	1.16288e-05
ENSG00000150551	1.80478	4.65206	3.64901e-07	1.16507e-05
ENSG00000085117	1.93725	3.58925	3.65037e-07	1.16507e-05
ENSG00000124882	1.70378	5.33532	3.73668e-07	1.1905e-05
ENSG00000123095	1.05196	4.8204	3.76311e-07	1.19679e-05
ENSG00000127564	1.15587	5.35178	3.81079e-07	1.20981e-05
ENSG00000197142	4.33732	1.82324	3.89481e-07	1.2343e-05
ENSG00000144583	4.45069	2.90128	3.93047e-07	1.2434e-05
ENSG00000228218	1.07555	5.95207	4.02729e-07	1.26955e-05
ENSG00000172954	1.5257	3.78901	4.11449e-07	1.29315e-05
ENSG00000109321	2.27124	0.590024	4.11655e-07	1.29315e-05
ENSG00000124813	1.34774	3.90087	4.13691e-07	1.29579e-05
ENSG00000227038	1.89825	2.11245	4.13941e-07	1.29579e-05
ENSG00000198488	5.22213	0.212029	4.25441e-07	1.32947e-05
ENSG00000137501	2.14403	6.14773	4.39265e-07	1.37028e-05
ENSG00000181690	1.47801	2.08058	4.46076e-07	1.38911e-05
ENSG00000204525	2.02276	3.2993	4.51987e-07	1.40508e-05
ENSG00000120318	1.37704	3.98227	4.6723e-07	1.44995e-05
ENSG00000167550	1.35106	1.97876	4.69152e-07	1.4534e-05
ENSG00000137440	5.8949	0.0808194	4.71326e-07	1.45762e-05
ENSG00000261524	1.79888	1.97255	5.0395e-07	1.55315e-05
ENSG00000116675	1.33816	3.86129	5.07724e-07	1.55943e-05
ENSG00000153391	1.02663	3.72523	5.15706e-07	1.58124e-05
ENSG00000137843	1.68421	1.79451	5.17786e-07	1.5849e-05
ENSG00000123610	3.07921	-0.128764	5.23245e-07	1.59616e-05
ENSG00000125731	2.16947	2.47463	5.35491e-07	1.63075e-05
ENSG00000101000	1.07519	4.52135	5.38252e-07	1.63361e-05
ENSG00000227954	1.87717	1.65082	5.46776e-07	1.65667e-05
ENSG00000169903	3.28034	3.93719	5.54265e-07	1.67653e-05
ENSG00000117394	1.23873	7.70071	5.58154e-07	1.68546e-05
ENSG00000054392	2.1562	4.40386	5.61644e-07	1.69315e-05
ENSG00000220418	1.69646	4.27528	5.686e-07	1.71124e-05
ENSG00000163545	1.50307	5.21661	5.72651e-07	1.71766e-05
ENSG00000104164	1.14166	5.40512	5.7587e-07	1.72444e-05
ENSG00000111186	1.57331	4.31529	5.83948e-07	1.74281e-05
ENSG00000147642	1.09115	4.21174	5.8642e-07	1.74728e-05
ENSG00000257704	1.14726	3.4805	5.91111e-07	1.75833e-05
ENSG00000164220	1.66364	1.9102	5.95814e-07	1.76939e-05
ENSG00000123685	1.77171	1.65547	5.98528e-07	1.77451e-05
ENSG00000090530	1.0405	7.54455	6.03031e-07	1.78491e-05
ENSG00000254534	1.60383	3.36143	6.04372e-07	1.78594e-05
ENSG00000251432	1.21761	2.9371	6.17974e-07	1.82312e-05
ENSG00000235275	1.39261	3.02875	6.19406e-07	1.82435e-05
ENSG00000147041	3.72215	1.42038	6.27095e-07	1.84176e-05
ENSG00000170577	2.22	0.0461127	6.2737e-07	1.84176e-05
ENSG00000115844	1.58759	3.63286	6.29464e-07	1.84488e-05
ENSG00000237807	5.23742	0.524884	6.3527e-07	1.85657e-05
ENSG00000065325	3.36621	0.971269	6.35522e-07	1.85657e-05
ENSG00000165424	1.12846	3.94835	6.78595e-07	1.97695e-05
ENSG00000162522	1.0326	6.32637	6.78932e-07	1.97695e-05
ENSG00000162520	2.02794	1.40848	6.83771e-07	1.98781e-05
ENSG00000081059	1.48009	3.59671	6.90773e-07	2.00492e-05
ENSG00000204792	2.30451	0.755686	7.05601e-07	2.04465e-05
ENSG00000226193	3.51477	-0.626172	7.21894e-07	2.08849e-05
ENSG00000164690	2.55076	1.4107	7.33633e-07	2.11903e-05
ENSG00000129474	1.29607	7.05491	7.54097e-07	2.17213e-05
ENSG00000143195	2.25851	2.53965	7.5444e-07	2.17213e-05
ENSG00000077942	1.26457	8.96898	7.59252e-07	2.18248e-05
ENSG00000173267	1.74044	4.25291	7.85135e-07	2.25327e-05
ENSG00000254004	1.13674	4.64771	8.15251e-07	2.33224e-05
ENSG00000163661	2.13672	3.3258	8.23308e-07	2.35154e-05
ENSG00000205809	2.91403	0.53297	8.33485e-07	2.37682e-05
ENSG00000185652	1.61945	1.19038	8.68157e-07	2.47177e-05
ENSG00000196420	3.47785	1.06655	8.9645e-07	2.54828e-05
ENSG00000175920	4.27628	-0.0723533	9.05233e-07	2.56917e-05
ENSG00000166923	2.50902	-0.190954	9.22971e-07	2.61421e-05
ENSG00000125347	1.1141	4.90527	9.24016e-07	2.61421e-05
ENSG00000147872	1.40053	5.97746	9.41207e-07	2.65447e-05
ENSG00000151892	2.40667	3.28554	9.7457e-07	2.74425e-05
ENSG00000168404	1.07468	5.00276	9.94736e-07	2.79361e-05
ENSG00000234745	2.43957	0.397585	9.95214e-07	2.79361e-05
ENSG00000111711	1.10773	5.31803	1.00986e-06	2.8303e-05
ENSG00000245522	1.92252	2.73301	1.02958e-06	2.88105e-05
ENSG00000165996	1.02906	4.43592	1.035e-06	2.89172e-05
ENSG00000181634	2.63425	2.28879	1.04272e-06	2.90876e-05
ENSG00000109472	1.33514	3.09927	1.05651e-06	2.94265e-05
ENSG00000176438	2.281	0.348273	1.05937e-06	2.94602e-05
ENSG00000138356	3.67942	1.70684	1.09328e-06	3.03128e-05
ENSG00000203721	3.2767	0.839927	1.0934e-06	3.03128e-05
ENSG00000183508	2.53247	0.971947	1.10503e-06	3.05878e-05
ENSG00000137193	1.11579	3.83425	1.11273e-06	3.07535e-05
ENSG00000158246	1.82711	1.10564	1.13e-06	3.11827e-05
ENSG00000171346	2.88301	0.475577	1.13484e-06	3.12682e-05
ENSG00000234817	2.51646	-0.232847	1.15542e-06	3.16894e-05
ENSG00000126709	2.60811	1.93069	1.1736e-06	3.21052e-05
ENSG00000157111	1.82385	1.52732	1.19929e-06	3.27421e-05
ENSG00000204257	1.4311	1.47768	1.21914e-06	3.32337e-05
ENSG00000267500	1.83837	0.171759	1.24954e-06	3.40107e-05
ENSG00000164509	3.5478	1.92533	1.25779e-06	3.41832e-05
ENSG00000171840	1.19598	2.43243	1.29567e-06	3.51595e-05
ENSG00000180861	2.68552	0.989929	1.32394e-06	3.58724e-05
ENSG00000105376	1.65387	2.41558	1.35771e-06	3.66766e-05
ENSG00000217889	1.2076	4.22079	1.38048e-06	3.71661e-05
ENSG00000105974	1.69369	7.90933	1.38205e-06	3.71661e-05
ENSG00000163435	1.86867	5.70052	1.45027e-06	3.8826e-05
ENSG00000162783	1.74686	3.7683	1.49025e-06	3.97564e-05
ENSG00000174749	2.81475	-0.0568519	1.49388e-06	3.97564e-05
ENSG00000121743	2.47297	-0.356485	1.5184e-06	4.0349e-05
ENSG00000108861	1.04555	7.56927	1.52487e-06	4.04608e-05
ENSG00000091986	3.09024	5.36753	1.53417e-06	4.06475e-05
ENSG00000179862	1.56991	2.46396	1.56858e-06	4.14635e-05
ENSG00000174574	1.47874	6.34861	1.57494e-06	4.15436e-05
ENSG00000105825	1.68726	6.0752	1.60795e-06	4.22907e-05
ENSG00000272003	1.40859	1.52129	1.60798e-06	4.22907e-05
ENSG00000198959	1.34177	8.52528	1.6171e-06	4.24152e-05
ENSG00000226405	1.18053	3.23837	1.61744e-06	4.24152e-05
ENSG00000235884	2.4751	5.13583	1.67314e-06	4.38118e-05
ENSG00000145743	1.46201	2.83444	1.69042e-06	4.41998e-05
ENSG00000172508	1.78858	0.276924	1.69775e-06	4.43268e-05
ENSG00000119900	1.4932	7.06613	1.71521e-06	4.46526e-05
ENSG00000106538	1.95294	1.69558	1.7188e-06	4.46814e-05
ENSG00000259727	3.01614	0.258405	1.80074e-06	4.66089e-05
ENSG00000228998	1.45171	5.91442	1.81603e-06	4.69367e-05
ENSG00000232556	1.06325	4.18338	1.90949e-06	4.91901e-05
ENSG00000239332	2.91212	0.632253	1.91144e-06	4.91901e-05
ENSG00000150782	1.24927	6.71904	1.91945e-06	4.93255e-05
ENSG00000117115	2.05957	0.243842	1.94251e-06	4.98466e-05
ENSG00000197587	2.23931	1.07707	1.96804e-06	5.03577e-05
ENSG00000223392	3.14885	-0.560415	1.98002e-06	5.0592e-05
ENSG00000273443	1.77676	0.773001	2.01649e-06	5.13047e-05
ENSG00000165046	1.86635	3.31388	2.0641e-06	5.23675e-05
ENSG00000196517	1.08703	4.77051	2.06972e-06	5.2436e-05
ENSG00000108551	2.92902	1.08346	2.07841e-06	5.25077e-05
ENSG00000104140	1.81782	0.289757	2.09154e-06	5.27651e-05
ENSG00000270145	1.6073	1.33811	2.12694e-06	5.35828e-05
ENSG00000160255	2.44262	3.66732	2.14902e-06	5.4063e-05
ENSG00000239268	1.89147	0.91277	2.17643e-06	5.46759e-05
ENSG00000183779	1.37191	4.14316	2.26471e-06	5.68141e-05
ENSG00000230769	1.28237	3.07466	2.2947e-06	5.74861e-05
ENSG00000214207	1.43202	6.73317	2.29972e-06	5.75314e-05
ENSG00000164300	1.25579	2.42919	2.31425e-06	5.77371e-05
ENSG00000087589	4.01356	-0.10091	2.32689e-06	5.79687e-05
ENSG00000136770	1.10889	4.23285	2.49851e-06	6.20718e-05
ENSG00000169241	1.36933	5.67885	2.50827e-06	6.2142e-05
ENSG00000259169	1.57613	2.25058	2.59209e-06	6.413e-05
ENSG00000188582	1.41483	2.19048	2.63016e-06	6.49824e-05
ENSG00000225889	1.70453	1.41522	2.63578e-06	6.50315e-05
ENSG00000184669	1.47672	1.37206	2.73389e-06	6.72673e-05
ENSG00000138744	1.30812	2.3879	2.7498e-06	6.75659e-05
ENSG00000130234	1.04638	6.89503	2.75659e-06	6.76402e-05
ENSG00000261824	1.00292	4.7198	2.76521e-06	6.77591e-05
ENSG00000196611	5.18608	2.03862	2.7973e-06	6.84518e-05
ENSG00000249396	1.70439	2.49674	2.81018e-06	6.85798e-05
ENSG00000091651	1.00533	6.39772	2.85363e-06	6.94512e-05
ENSG00000143248	1.51149	7.48934	2.96166e-06	7.18853e-05
ENSG00000067798	2.00194	3.67002	2.98384e-06	7.23258e-05
ENSG00000112378	1.40973	8.49489	3.00491e-06	7.26404e-05
ENSG00000118503	1.84296	3.8303	3.08859e-06	7.44624e-05
ENSG00000130545	1.95373	1.37283	3.11691e-06	7.50442e-05
ENSG00000077150	1.14306	6.49254	3.12771e-06	7.52034e-05
ENSG00000088538	1.1007	3.47655	3.13334e-06	7.52379e-05
ENSG00000213030	4.4201	-0.325323	3.15075e-06	7.55548e-05
ENSG00000100505	1.44382	3.9595	3.15837e-06	7.56363e-05
ENSG00000236098	1.97489	2.50737	3.16767e-06	7.57579e-05
ENSG00000125966	2.39861	3.30248	3.24037e-06	7.73935e-05
ENSG00000169085	3.00783	3.01591	3.25411e-06	7.76183e-05
ENSG00000246640	2.86487	1.83051	3.26329e-06	7.7734e-05
ENSG00000176170	2.40784	3.44843	3.28736e-06	7.82033e-05
ENSG00000173077	2.7349	1.08164	3.32714e-06	7.89789e-05
ENSG00000141655	2.08662	0.086826	3.32876e-06	7.89789e-05
ENSG00000169429	3.05153	2.74448	3.3398e-06	7.9136e-05
ENSG00000122863	1.0719	5.48467	3.42811e-06	8.09636e-05
ENSG00000138685	1.15645	5.64324	3.43123e-06	8.09636e-05
ENSG00000103723	3.2613	0.929011	3.44243e-06	8.09637e-05
ENSG00000126259	1.59928	1.74417	3.44853e-06	8.09637e-05
ENSG00000215807	1.31729	3.43974	3.47731e-06	8.15327e-05
ENSG00000008517	2.41013	2.57549	3.51802e-06	8.23795e-05
ENSG00000154928	2.66005	1.54436	3.52836e-06	8.2514e-05
ENSG00000175294	1.79629	3.67896	3.54573e-06	8.27045e-05
ENSG00000198435	1.24372	4.67846	3.58021e-06	8.34003e-05
ENSG00000130066	1.10875	5.88181	3.60901e-06	8.39621e-05
ENSG00000180155	1.90852	2.83465	3.64422e-06	8.4562e-05
ENSG00000229167	3.54963	-0.379819	3.65198e-06	8.46326e-05
ENSG00000213177	1.03486	5.49633	3.66114e-06	8.47352e-05
ENSG00000256894	1.86922	0.540004	3.80758e-06	8.77847e-05
ENSG00000228125	1.46726	3.40761	3.88331e-06	8.94157e-05
ENSG00000140832	1.90976	0.491268	3.92995e-06	9.03736e-05
ENSG00000197019	2.20203	4.2808	4.02015e-06	9.23296e-05
ENSG00000205595	1.97068	0.503699	4.04002e-06	9.26674e-05
ENSG00000240006	2.04788	1.74143	4.04544e-06	9.26731e-05
ENSG00000104320	1.0267	7.40422	4.05128e-06	9.26886e-05
ENSG00000244515	1.46585	1.86299	4.11202e-06	9.39584e-05
ENSG00000113763	1.78666	1.60015	4.16343e-06	9.48912e-05
ENSG00000205426	3.00802	-0.0543912	4.20099e-06	9.56259e-05
ENSG00000180801	1.29872	4.57866	4.21246e-06	9.57653e-05
ENSG00000137285	1.33283	4.56886	4.25485e-06	9.66065e-05
ENSG00000249744	1.66907	0.815386	4.27967e-06	9.70473e-05
ENSG00000042493	1.38604	6.83758	4.33615e-06	9.8204e-05
ENSG00000163814	1.8364	5.15495	4.3557e-06	9.85222e-05
ENSG00000149633	3.7786	-0.453031	4.36565e-06	9.8623e-05
ENSG00000160886	2.99241	0.614208	4.39165e-06	9.90856e-05
ENSG00000114450	1.41271	3.98791	4.40496e-06	9.91876e-05
ENSG00000261305	3.01681	-0.457289	4.40723e-06	9.91876e-05
ENSG00000226955	1.09007	2.81922	4.42879e-06	9.93084e-05
ENSG00000164877	1.03567	4.15446	4.43339e-06	9.93084e-05
ENSG00000188112	1.5895	0.45966	4.43424e-06	9.93084e-05
ENSG00000123570	2.71651	0.661453	4.43475e-06	9.93084e-05
ENSG00000214012	1.31179	3.5458	4.44089e-06	9.93219e-05
ENSG00000140564	1.11973	7.10368	4.46695e-06	9.96563e-05
ENSG00000106799	1.36562	4.90544	4.48092e-06	9.98437e-05
ENSG00000257758	1.65566	0.548254	4.54115e-06	0.00010106
ENSG00000102780	1.21358	4.21121	4.56567e-06	0.000101473
ENSG00000198910	2.04221	5.57654	4.57101e-06	0.000101473
ENSG00000157613	2.19364	0.963787	4.59829e-06	0.000101952
ENSG00000204894	1.02966	3.10047	4.65515e-06	0.000103086
ENSG00000133321	2.63227	1.9795	4.76644e-06	0.000105417
ENSG00000124145	1.61242	7.68567	4.77217e-06	0.000105417
ENSG00000175793	4.69753	2.97896	4.86328e-06	0.000107297
ENSG00000119922	1.58694	2.12495	4.9238e-06	0.000108499
ENSG00000168453	1.13692	3.12379	5.21166e-06	0.000114421
ENSG00000238199	1.32302	1.5874	5.3221e-06	0.000116702
ENSG00000234267	1.83026	0.404271	5.40939e-06	0.000118183
ENSG00000074695	1.0313	6.55523	5.49774e-06	0.000119967
ENSG00000154678	1.88517	2.54173	5.7005e-06	0.00012424
ENSG00000244503	2.89076	0.0995022	5.71169e-06	0.000124295
ENSG00000131094	1.55399	3.26525	5.71703e-06	0.000124295
ENSG00000149084	1.04566	5.49539	5.72378e-06	0.000124295
ENSG00000263470	1.45184	3.07653	5.7369e-06	0.000124429
ENSG00000188015	1.74054	1.70098	5.76532e-06	0.000124894
ENSG00000143320	2.00517	5.82896	5.83745e-06	0.000126304
ENSG00000181350	1.6167	1.17732	5.92342e-06	0.00012801
ENSG00000172889	1.28857	4.08082	5.9992e-06	0.000129436
ENSG00000138772	1.69595	4.4692	6.17745e-06	0.000132542
ENSG00000178038	1.65366	1.0021	6.22843e-06	0.000133476
ENSG00000226798	2.90909	-0.287732	6.31623e-06	0.000135196
ENSG00000113083	1.44642	1.52439	6.43819e-06	0.000137642
ENSG00000102554	1.87367	3.94242	6.46851e-06	0.000138116
ENSG00000144681	1.23004	3.25605	6.47573e-06	0.000138116
ENSG00000127329	3.13248	0.895758	6.62774e-06	0.00014119
ENSG00000133069	1.75484	2.38976	6.68117e-06	0.000142159
ENSG00000226087	4.23607	-0.831615	6.70907e-06	0.000142584
ENSG00000137936	1.92675	4.0667	6.73322e-06	0.000142928
ENSG00000164949	1.10493	5.39309	6.75459e-06	0.000143212
ENSG00000260053	1.83936	1.52999	6.82853e-06	0.000144608
ENSG00000182132	2.34282	0.589728	6.93211e-06	0.000146629
ENSG00000111859	1.01841	5.00005	6.97527e-06	0.000147368
ENSG00000174125	1.80449	0.468559	7.1472e-06	0.000150646
ENSG00000237976	1.74666	0.482515	7.24047e-06	0.000152254
ENSG00000175356	1.76539	0.617582	7.27288e-06	0.000152756
ENSG00000126264	2.03573	-0.0105953	7.33539e-06	0.00015353
ENSG00000062038	2.14253	1.69111	7.3576e-06	0.000153815
ENSG00000167755	2.29978	6.03916	7.42251e-06	0.000154991
ENSG00000250312	1.28493	1.67138	7.43727e-06	0.000155119
ENSG00000173805	2.2533	2.21065	7.55846e-06	0.000157099
ENSG00000212719	1.05335	3.96986	7.60376e-06	0.000157857
ENSG00000174032	1.18624	5.71406	7.63783e-06	0.000158381
ENSG00000033867	1.05433	6.54455	7.70051e-06	0.000159497
ENSG00000163637	1.12623	2.81235	7.73266e-06	0.000159978
ENSG00000102271	2.02546	2.23285	7.83232e-06	0.000161667
ENSG00000181381	1.88211	0.955851	8.28254e-06	0.000170371
ENSG00000111344	1.00084	3.3411	8.31635e-06	0.000170871
ENSG00000079156	3.47832	-0.316869	8.38363e-06	0.000172056
ENSG00000164251	1.35217	7.05159	8.50823e-06	0.000174414
ENSG00000184731	1.98684	0.0932031	8.70288e-06	0.000177794
ENSG00000095794	1.33536	3.91538	8.8412e-06	0.000180415
ENSG00000235398	1.49752	1.2565	8.87265e-06	0.000180851
ENSG00000116745	2.861	1.60631	8.96351e-06	0.000182495
ENSG00000023445	2.5431	4.08629	8.99841e-06	0.000182998
ENSG00000188511	2.83956	1.42064	9.10913e-06	0.000184622
ENSG00000189067	1.22784	7.61098	9.15871e-06	0.000185417
ENSG00000151689	1.4697	0.599599	9.21381e-06	0.000186323
ENSG00000082781	1.35323	6.29579	9.25935e-06	0.000186557
ENSG00000163428	1.11415	5.65015	9.26196e-06	0.000186557
ENSG00000101017	1.15186	3.12087	9.26569e-06	0.000186557
ENSG00000111816	1.25	3.8541	9.26702e-06	0.000186557
ENSG00000116254	1.42366	3.7983	9.40337e-06	0.000188878
ENSG00000142871	1.43286	6.94286	9.90091e-06	0.000197765
ENSG00000156535	1.22046	6.65875	9.96599e-06	0.000198843
ENSG00000137502	1.15636	3.32829	9.98836e-06	0.000199068
ENSG00000237765	1.00548	4.92671	1.00402e-05	0.000199878
ENSG00000186086	1.70674	0.328994	1.01417e-05	0.000201452
ENSG00000064300	2.69613	3.93823	1.025e-05	0.000203198
ENSG00000075223	1.73606	6.00878	1.02523e-05	0.000203198
ENSG00000165244	1.33551	5.51755	1.02656e-05	0.000203238
ENSG00000215089	1.25053	6.7265	1.03211e-05	0.000204113
ENSG00000226312	3.38835	1.49345	1.03517e-05	0.000204492
ENSG00000105088	1.73609	3.13014	1.04815e-05	0.000206827
ENSG00000086967	2.79018	-0.210023	1.04952e-05	0.000206871
ENSG00000226053	3.0028	0.807365	1.05657e-05	0.000208032
ENSG00000249406	3.51923	-0.227215	1.07086e-05	0.000210563
ENSG00000126903	1.47484	5.2604	1.07177e-05	0.000210563
ENSG00000167608	1.52083	0.865643	1.07455e-05	0.000210878
ENSG00000107738	1.88325	2.30753	1.07795e-05	0.000211313
ENSG00000175573	1.51276	5.92043	1.08213e-05	0.000211902
ENSG00000133055	2.39717	0.471534	1.1071e-05	0.000216554
ENSG00000222041	1.23973	4.71916	1.11615e-05	0.000218087
ENSG00000161243	1.20445	5.86702	1.12491e-05	0.000219559
ENSG00000111057	1.15751	6.24247	1.13272e-05	0.000220843
ENSG00000168389	2.15005	3.2124	1.15509e-05	0.000224231
ENSG00000114923	1.17932	2.79987	1.16375e-05	0.000225667
ENSG00000128335	1.93409	4.98203	1.17513e-05	0.000227628
ENSG00000151012	1.28454	5.63367	1.17759e-05	0.000227858
ENSG00000180537	1.67501	3.57874	1.19502e-05	0.000230803
ENSG00000124693	2.52055	0.428732	1.19667e-05	0.000230803
ENSG00000149599	1.93564	0.338199	1.21915e-05	0.000234635
ENSG00000256268	2.62641	0.805443	1.22896e-05	0.000235776
ENSG00000145198	1.43882	0.850311	1.22903e-05	0.000235776
ENSG00000163453	1.11833	6.48369	1.24894e-05	0.000239339
ENSG00000213943	1.17668	4.02585	1.26741e-05	0.000242362
ENSG00000168546	2.60524	-0.360627	1.28061e-05	0.000244626
ENSG00000115590	2.64667	3.24318	1.29984e-05	0.000248034
ENSG00000164976	1.68487	3.65192	1.30365e-05	0.000248496
ENSG00000116717	1.97823	4.80275	1.323e-05	0.000251918
ENSG00000119986	1.06764	2.44107	1.33618e-05	0.000254102
ENSG00000170498	8.12881	0.335642	1.3373e-05	0.000254102
ENSG00000095203	1.33415	2.01361	1.35282e-05	0.000256506
ENSG00000128512	1.16627	6.36362	1.3608e-05	0.000257245
ENSG00000117408	1.20346	6.26586	1.36245e-05	0.000257245
ENSG00000262823	2.2491	0.841661	1.40596e-05	0.000265182
ENSG00000085563	1.46665	1.45163	1.41259e-05	0.000266152
ENSG00000197860	1.15864	3.74344	1.4178e-05	0.000266854
ENSG00000189171	1.16409	5.77118	1.43919e-05	0.000270028
ENSG00000228630	2.15059	0.287729	1.44227e-05	0.000270325
ENSG00000170801	2.13612	1.6923	1.46142e-05	0.000273342
ENSG00000228991	1.19803	2.45593	1.46704e-05	0.000273847
ENSG00000215049	1.02997	4.60599	1.46878e-05	0.000273863
ENSG00000165323	2.30985	1.30617	1.48281e-05	0.000276064
ENSG00000152377	1.80618	5.04193	1.48367e-05	0.000276064
ENSG00000138131	2.63135	4.20671	1.48959e-05	0.000276878
ENSG00000132915	3.62052	0.161168	1.53544e-05	0.000285105
ENSG00000115041	1.15638	4.38696	1.54649e-05	0.000286861
ENSG00000268001	1.44244	0.925692	1.54997e-05	0.000287208
ENSG00000116990	1.62863	0.959874	1.58225e-05	0.000292285
ENSG00000182747	2.71997	-0.128617	1.60252e-05	0.000295725
ENSG00000116761	1.23298	4.51285	1.6661e-05	0.000306197
ENSG00000102007	1.21481	6.74009	1.70238e-05	0.000312189
ENSG00000189143	2.60333	5.05263	1.75997e-05	0.000320819
ENSG00000117707	1.3149	1.14166	1.79383e-05	0.000325894
ENSG00000111319	2.09553	1.89413	1.79508e-05	0.000325894
ENSG00000133816	1.108	5.40068	1.82294e-05	0.000330284
ENSG00000183087	1.63527	2.12815	1.82589e-05	0.000330485
ENSG00000197852	1.79068	2.21509	1.83116e-05	0.000331104
ENSG00000135604	1.84631	2.6831	1.83536e-05	0.000331529
ENSG00000154035	1.37405	4.24126	1.84261e-05	0.000332504
ENSG00000072954	1.17075	2.2281	1.86067e-05	0.000335088
ENSG00000151239	1.15146	5.79401	1.89445e-05	0.000339807
ENSG00000143669	1.38803	4.83353	1.9356e-05	0.000345805
ENSG00000224531	1.25702	5.41827	1.94248e-05	0.000346689
ENSG00000158050	1.40447	2.54789	1.97046e-05	0.000351334
ENSG00000188483	1.02737	3.27504	1.9876e-05	0.000353686
ENSG00000116396	1.24294	2.43622	2.01296e-05	0.000357489
ENSG00000146197	1.69406	0.28722	2.02148e-05	0.000358647
ENSG00000261356	1.02045	2.43764	2.0299e-05	0.000359484
ENSG00000248893	1.47969	2.05973	2.03146e-05	0.000359484
ENSG00000167244	1.24762	8.80012	2.03221e-05	0.000359484
ENSG00000257675	1.03842	4.91853	2.03906e-05	0.000360342
ENSG00000164308	1.79198	6.25883	2.04622e-05	0.000360561
ENSG00000117472	2.99605	1.03856	2.10583e-05	0.000369591
ENSG00000250548	1.86293	1.13277	2.11772e-05	0.000370953
ENSG00000107821	2.05016	2.45477	2.15816e-05	0.000377668
ENSG00000230863	1.24286	2.75533	2.16496e-05	0.000378488
ENSG00000141068	1.03208	3.87387	2.19084e-05	0.00038264
ENSG00000188763	1.67719	0.790686	2.20317e-05	0.000384111
ENSG00000213406	1.15743	4.4446	2.20355e-05	0.000384111
ENSG00000146054	1.52279	3.26045	2.26899e-05	0.000393852
ENSG00000112276	1.99497	1.01464	2.27041e-05	0.000393852
ENSG00000131378	1.13359	2.80359	2.28172e-05	0.000395061
ENSG00000106397	1.00665	6.87148	2.28212e-05	0.000395061
ENSG00000166173	1.04788	4.43279	2.2858e-05	0.000395061
ENSG00000197415	1.51793	4.57233	2.29983e-05	0.000396514
ENSG00000172183	1.31592	1.38324	2.30123e-05	0.000396514
ENSG00000173559	1.2108	5.81227	2.31963e-05	0.000399302
ENSG00000198246	1.49733	2.60649	2.32368e-05	0.000399615
ENSG00000225950	2.12943	0.368784	2.35488e-05	0.000404205
ENSG00000226950	1.13164	6.3624	2.35805e-05	0.000404363
ENSG00000106624	1.50763	5.83791	2.38074e-05	0.000407475
ENSG00000125730	4.16148	2.69409	2.3843e-05	0.000407694
ENSG00000197380	2.8522	0.710268	2.39231e-05	0.000408587
ENSG00000196189	2.21256	0.435476	2.39408e-05	0.000408587
ENSG00000128165	1.03333	5.61823	2.4018e-05	0.00040937
ENSG00000182179	3.83744	0.746147	2.40323e-05	0.00040937
ENSG00000234737	1.17258	4.97144	2.40767e-05	0.000409657
ENSG00000023902	1.34385	1.67869	2.41169e-05	0.000409657
ENSG00000139926	1.29986	5.02592	2.4118e-05	0.000409657
ENSG00000134245	1.10847	6.80406	2.41404e-05	0.000409657
ENSG00000142798	1.21938	6.52937	2.41762e-05	0.000409876
ENSG00000185269	1.81516	0.880867	2.4234e-05	0.000410467
ENSG00000224473	1.21181	2.7895	2.43568e-05	0.000412158
ENSG00000112679	1.0544	4.72131	2.45134e-05	0.000414053
ENSG00000148848	1.87284	0.866382	2.45149e-05	0.000414053
ENSG00000165997	1.44911	5.66074	2.46377e-05	0.000415734
ENSG00000148153	1.4318	4.49234	2.4703e-05	0.000416445
ENSG00000084453	1.67591	3.68995	2.47817e-05	0.000417379
ENSG00000163083	2.06866	4.72129	2.4873e-05	0.000418524
ENSG00000006283	1.83386	0.960295	2.56659e-05	0.00042985
ENSG00000137752	4.62655	-0.52536	2.69622e-05	0.000450719
ENSG00000166396	3.68882	-0.349828	2.70228e-05	0.000451311
ENSG00000146858	1.11366	3.28651	2.73769e-05	0.000455951
ENSG00000118785	2.01989	10.6211	2.77992e-05	0.000462555
ENSG00000108176	1.4094	2.80264	2.78391e-05	0.00046279
ENSG00000122787	2.19861	0.524837	2.81366e-05	0.000467302
ENSG00000187608	1.32564	4.23724	2.89511e-05	0.000479498
ENSG00000166922	1.70402	0.534624	2.91018e-05	0.000481172
ENSG00000226044	3.40587	-0.396879	2.92637e-05	0.000483336
ENSG00000100253	1.25659	3.31555	2.93853e-05	0.000484453
ENSG00000166801	1.28869	2.2164	2.95206e-05	0.000486235
ENSG00000167513	1.07843	6.07721	2.99901e-05	0.000493064
ENSG00000262003	1.70439	2.84389	3.02937e-05	0.000497143
ENSG00000161714	1.02634	6.3028	3.0394e-05	0.000497878
ENSG00000204291	3.67509	0.366953	3.08283e-05	0.000503787
ENSG00000221963	2.04668	5.58771	3.08672e-05	0.000503789
ENSG00000154265	1.18697	3.63378	3.1065e-05	0.000506558
ENSG00000108797	1.38122	5.49154	3.11292e-05	0.000507143
ENSG00000053747	1.27062	5.68144	3.15575e-05	0.000513655
ENSG00000157514	1.09474	5.24518	3.1933e-05	0.000519295
ENSG00000111801	1.6337	1.91135	3.24967e-05	0.000526552
ENSG00000167895	1.57828	1.78152	3.2859e-05	0.000530983
ENSG00000101213	1.88481	0.763424	3.32416e-05	0.000536683
ENSG00000261780	1.092	5.64426	3.33838e-05	0.000538493
ENSG00000231020	1.89936	-0.144	3.36481e-05	0.00054227
ENSG00000101210	1.06737	6.84268	3.3769e-05	0.000543729
ENSG00000163975	1.11807	3.93103	3.3808e-05	0.000543869
ENSG00000185950	1.04739	2.47696	3.41652e-05	0.000548632
ENSG00000106034	1.59808	1.09214	3.4212e-05	0.000548878
ENSG00000035862	1.3245	8.10381	3.42418e-05	0.000548878
ENSG00000163491	1.32731	3.14571	3.47162e-05	0.000555986
ENSG00000143631	2.03106	5.97743	3.49072e-05	0.000558546
ENSG00000185101	1.67915	2.66952	3.53044e-05	0.000564399
ENSG00000001461	1.30193	4.5055	3.55493e-05	0.00056739
ENSG00000148677	2.79287	5.01101	3.55591e-05	0.00056739
ENSG00000151414	1.07005	5.56081	3.55864e-05	0.00056739
ENSG00000196533	1.24781	4.28966	3.56706e-05	0.000567723
ENSG00000134548	1.83343	6.16205	3.58401e-05	0.000569409
ENSG00000134917	2.08082	0.889047	3.60645e-05	0.000572469
ENSG00000112149	1.2809	2.91144	3.62477e-05	0.00057436
ENSG00000143630	1.23701	3.88656	3.65563e-05	0.000577718
ENSG00000154146	1.31221	4.13238	3.68832e-05	0.000581734
ENSG00000164532	1.42818	0.581715	3.68852e-05	0.000581734
ENSG00000214283	1.16494	3.65301	3.69077e-05	0.000581734
ENSG00000127528	1.77937	1.68651	3.7851e-05	0.000595033
ENSG00000135747	1.15564	4.68523	3.79696e-05	0.000596376
ENSG00000075426	1.23844	6.48496	3.84331e-05	0.000602074
ENSG00000158427	1.01607	2.5266	3.92056e-05	0.00061364
ENSG00000163623	1.25443	1.70329	3.98795e-05	0.000622558
ENSG00000260877	1.80062	1.2514	4.00912e-05	0.000625319
ENSG00000224687	1.67975	0.511167	4.03972e-05	0.000628997
ENSG00000172927	1.34617	7.6901	4.05133e-05	0.00062977
ENSG00000136960	1.10657	2.6761	4.05254e-05	0.00062977
ENSG00000226251	3.44809	0.721479	4.05522e-05	0.00062977
ENSG00000179913	1.13153	3.83094	4.06314e-05	0.000630455
ENSG00000170442	2.16777	-0.0882121	4.08228e-05	0.000632877
ENSG00000179528	1.26015	2.29474	4.1128e-05	0.000637058
ENSG00000254285	1.32372	8.04273	4.22041e-05	0.000647575
ENSG00000052850	1.91618	-0.0761092	4.23012e-05	0.00064851
ENSG00000229155	1.34208	1.8896	4.2552e-05	0.000651798
ENSG00000175183	1.11721	3.86377	4.27046e-05	0.000653577
ENSG00000213155	1.46108	1.32045	4.29583e-05	0.000656899
ENSG00000070404	1.9262	5.64188	4.37029e-05	0.000667717
ENSG00000135549	1.55217	3.17077	4.44855e-05	0.000677941
ENSG00000157870	1.06658	4.83072	4.54869e-05	0.000690917
ENSG00000179023	1.27787	4.80047	4.7241e-05	0.00071447
ENSG00000242539	1.60771	1.14463	4.77179e-05	0.000719257
ENSG00000113739	1.19543	7.46312	4.85814e-05	0.000731044
ENSG00000143369	2.07271	2.63263	4.90509e-05	0.000736873
ENSG00000124225	1.65054	5.08035	4.96474e-05	0.000744321
ENSG00000172159	1.02693	4.71909	4.96712e-05	0.000744321
ENSG00000230825	1.51892	0.459054	4.98892e-05	0.00074634
ENSG00000227517	2.03331	0.6248	5.05486e-05	0.000754317
ENSG00000135636	2.9796	2.38672	5.08474e-05	0.000756888
ENSG00000131795	1.18515	5.13661	5.14968e-05	0.00076411
ENSG00000129354	1.29878	5.4501	5.1503e-05	0.00076411
ENSG00000080031	1.14114	1.97707	5.29392e-05	0.000784121
ENSG00000227534	1.41364	1.62207	5.43003e-05	0.000801634
ENSG00000117152	1.9336	1.35077	5.51498e-05	0.000813504
ENSG00000158825	1.97103	0.108207	5.65193e-05	0.000831654
ENSG00000233117	2.93108	0.211383	5.65776e-05	0.00083168
ENSG00000263718	1.68436	0.33478	5.66138e-05	0.00083168
ENSG00000019505	1.42069	6.03727	5.67846e-05	0.000832825
ENSG00000124568	1.06726	2.00315	5.82299e-05	0.000851239
ENSG00000224818	1.4099	0.864598	5.83126e-05	0.000851753
ENSG00000180616	1.59692	0.480838	5.85528e-05	0.000854565
ENSG00000184185	1.70988	-0.242858	5.87034e-05	0.000855372
ENSG00000254991	3.96888	-0.43201	5.98351e-05	0.000870448
ENSG00000126458	1.08457	4.97616	6.02734e-05	0.000876114
ENSG00000118473	1.14453	3.08144	6.14226e-05	0.000890652
ENSG00000258671	2.15421	0.258522	6.22327e-05	0.00090167
ENSG00000112406	2.54241	1.84167	6.32635e-05	0.000913653
ENSG00000058335	3.64594	-0.107775	6.56842e-05	0.000945568
ENSG00000255201	2.17644	1.59449	6.66501e-05	0.000957936
ENSG00000115884	1.18329	6.55337	6.74855e-05	0.000969165
ENSG00000178919	1.06354	3.29488	6.88245e-05	0.000986815
ENSG00000107611	1.8206	-0.19939	6.95335e-05	0.000993803
ENSG00000214756	1.09887	3.14522	6.96966e-05	0.000995341
ENSG00000112902	2.69623	2.88554	7.00649e-05	0.000999805
ENSG00000224520	1.26529	5.40318	7.04289e-05	0.0010042
ENSG00000132932	2.76817	1.55161	7.05233e-05	0.00100475
ENSG00000117335	1.09538	7.84231	7.1325e-05	0.00101536
ENSG00000145934	2.56564	4.58088	7.35135e-05	0.00104156
ENSG00000197956	1.40173	8.00397	7.3868e-05	0.00104575
ENSG00000226971	1.21908	3.6453	7.40738e-05	0.00104784
ENSG00000072682	1.21639	5.34044	7.49509e-05	0.00105941
ENSG00000142178	1.41651	4.43586	7.61044e-05	0.00107234
ENSG00000115902	1.18417	5.69213	7.6219e-05	0.00107311
ENSG00000138152	1.64691	2.78782	7.80837e-05	0.00109678
ENSG00000204580	1.17492	6.1706	7.834e-05	0.00109924
ENSG00000178752	1.08342	5.12917	7.83816e-05	0.00109924
ENSG00000213654	1.52369	3.5848	7.97343e-05	0.00111734
ENSG00000250762	1.24199	0.877376	8.01853e-05	0.00112278
ENSG00000228209	1.20033	1.18473	8.12377e-05	0.00113574
ENSG00000240024	1.28785	4.25214	8.17059e-05	0.0011414
ENSG00000147676	2.92058	-0.36141	8.17932e-05	0.00114173
ENSG00000267288	1.35911	2.02068	8.21494e-05	0.00114581
ENSG00000149596	2.6583	1.64649	8.24232e-05	0.00114866
ENSG00000157224	1.18828	5.55046	8.25561e-05	0.00114866
ENSG00000235750	1.87694	0.267374	8.26061e-05	0.00114866
ENSG00000175175	1.62835	2.03279	8.28113e-05	0.00115057
ENSG00000250539	1.27844	4.62417	8.41307e-05	0.00116709
ENSG00000266278	2.70083	0.438852	8.51002e-05	0.00117781
ENSG00000214161	1.71453	0.428749	8.61163e-05	0.00118821
ENSG00000091490	1.17749	5.12482	8.61836e-05	0.00118822
ENSG00000267372	2.70392	1.41539	8.63443e-05	0.00118952
ENSG00000153814	1.48517	2.40429	8.65061e-05	0.00119084
ENSG00000110195	1.12719	4.46613	8.71822e-05	0.00119739
ENSG00000204592	1.20282	5.88899	8.78237e-05	0.00120435
ENSG00000145632	1.17897	7.00064	8.94477e-05	0.00122382
ENSG00000230836	2.07709	0.98598	8.96637e-05	0.00122584
ENSG00000109705	2.04685	1.30018	9.01116e-05	0.0012302
ENSG00000233684	2.73468	-0.0435433	9.03402e-05	0.00123227
ENSG00000172738	1.72264	0.293833	9.04379e-05	0.00123266
ENSG00000148154	1.07668	6.90859	9.0637e-05	0.00123444
ENSG00000125872	1.73846	5.96221	9.07312e-05	0.00123478
ENSG00000162975	1.4932	2.15888	9.12463e-05	0.00123991
ENSG00000100558	1.16028	4.30973	9.24383e-05	0.00125231
ENSG00000228459	1.70591	0.306021	9.25902e-05	0.00125343
ENSG00000136630	1.14773	1.7082	9.27035e-05	0.00125401
ENSG00000266680	2.14834	-0.51512	9.4296e-05	0.00127283
ENSG00000163874	1.23543	2.77871	9.43071e-05	0.00127283
ENSG00000267478	1.10455	2.82946	9.51591e-05	0.0012824
ENSG00000244128	1.07691	3.45251	9.62183e-05	0.0012957
ENSG00000187726	1.67563	0.193193	9.65629e-05	0.00129839
ENSG00000237249	1.13621	1.46502	9.75995e-05	0.00131036
ENSG00000103241	1.23166	1.83438	9.87694e-05	0.00132353
ENSG00000113657	1.44354	7.88777	9.88019e-05	0.00132353
ENSG00000186642	2.54342	1.17258	9.92424e-05	0.00132844
ENSG00000023171	2.32317	0.351413	0.000100614	0.0013448
ENSG00000183691	1.85653	1.2951	0.000101576	0.00135664
ENSG00000142677	2.17561	0.642949	0.00010368	0.00138268
ENSG00000135973	1.99647	1.45056	0.000104101	0.00138726
ENSG00000113070	2.20952	6.09161	0.000105152	0.0013992
ENSG00000244242	1.45135	3.84794	0.000106616	0.00141448
ENSG00000196569	1.24627	2.55903	0.000107845	0.00142867
ENSG00000107518	1.44602	1.36336	0.000107971	0.00142928
ENSG00000092096	1.1521	3.81148	0.000108901	0.00143947
ENSG00000101331	2.20315	2.17153	0.000109731	0.0014483
ENSG00000264644	1.33039	2.4772	0.000111196	0.00146548
ENSG00000185187	1.39848	1.44591	0.000111555	0.00146806
ENSG00000176855	1.20393	2.54284	0.000113937	0.0014983
ENSG00000261764	1.37541	1.39892	0.000114034	0.00149848
ENSG00000170421	1.24714	8.72166	0.000114903	0.0015088
ENSG00000137959	1.89112	-0.0360609	0.000116328	0.00152528
ENSG00000174307	1.33937	4.40601	0.000119505	0.0015635
ENSG00000186862	1.70253	0.331739	0.000120518	0.00157332
ENSG00000185339	1.21923	5.3757	0.000123407	0.00160751
ENSG00000258976	1.53676	0.907624	0.00012503	0.00162609
ENSG00000101096	1.88924	0.887504	0.000125243	0.0016267
ENSG00000198853	1.32469	5.36426	0.000126351	0.00163518
ENSG00000099260	1.78847	1.22179	0.000130228	0.0016793
ENSG00000253227	2.75255	0.235589	0.000130392	0.0016802
ENSG00000229991	1.55179	6.76201	0.00013172	0.00169366
ENSG00000180385	1.28795	3.86654	0.000133909	0.00172058
ENSG00000107719	1.66204	0.202129	0.000134011	0.00172066
ENSG00000258624	1.51135	3.59087	0.000135222	0.00173124
ENSG00000159753	1.44996	2.74686	0.000137025	0.00174934
ENSG00000256940	2.01981	1.69001	0.000137915	0.00175694
ENSG00000196564	1.36549	1.38476	0.000138184	0.00175835
ENSG00000186792	1.51025	4.11931	0.000138439	0.00175988
ENSG00000213785	1.55044	7.46566	0.000138598	0.00176065
ENSG00000250749	1.26825	1.58267	0.000138741	0.00176121
ENSG00000167889	1.56928	5.0234	0.000139998	0.00177592
ENSG00000182557	1.54528	1.29469	0.000140767	0.00178441
ENSG00000170369	4.37246	-0.931441	0.000141591	0.00179278
ENSG00000253111	2.81166	0.653206	0.000141627	0.00179278
ENSG00000179715	1.22445	3.9061	0.000142524	0.00180159
ENSG00000223486	2.08037	-0.148477	0.000143035	0.0018055
ENSG00000259863	1.42211	0.0372762	0.000143516	0.00180911
ENSG00000266899	1.5509	8.09531	0.000143905	0.0018112
ENSG00000156886	1.40622	4.39779	0.000144194	0.00181248
ENSG00000074047	1.53737	1.07394	0.000144343	0.00181257
ENSG00000128591	1.79463	6.55215	0.000146695	0.00184005
ENSG00000184371	1.27347	5.2357	0.000147347	0.00184435
ENSG00000005981	2.51259	-0.467923	0.000147604	0.00184628
ENSG00000145217	1.25226	1.88854	0.000149318	0.00186383
ENSG00000217801	1.19825	2.87406	0.000150525	0.00187758
ENSG00000033122	1.61129	1.06027	0.000153827	0.00191125
ENSG00000145990	1.51015	0.58964	0.000153867	0.00191125
ENSG00000242574	2.56535	5.64109	0.00015397	0.00191125
ENSG00000215802	1.03579	2.17291	0.000156159	0.00193708
ENSG00000122694	1.17397	1.89852	0.000156279	0.00193723
ENSG00000237945	2.30441	0.214308	0.000157674	0.00194646
ENSG00000223418	1.18847	2.05763	0.000159546	0.00196685
ENSG00000164920	1.43115	1.59411	0.000161624	0.00198974
ENSG00000125637	1.21473	4.77339	0.00016233	0.00199706
ENSG00000216740	1.11636	3.30671	0.000162891	0.00200259
ENSG00000164120	2.20846	5.62872	0.000163067	0.00200338
ENSG00000100302	2.22821	0.847353	0.000163814	0.0020098
ENSG00000121753	1.31973	3.49814	0.000165546	0.00202967
ENSG00000148702	1.7318	1.75067	0.000167554	0.00204902
ENSG00000114529	1.51668	4.34147	0.000168665	0.00205946
ENSG00000167653	2.69198	0.565252	0.000172764	0.00210378
ENSG00000168077	1.44413	4.52305	0.000173039	0.0021057
ENSG00000106258	1.15666	2.41447	0.000177083	0.00215054
ENSG00000260834	1.79015	-0.354774	0.000177714	0.00215674
ENSG00000219433	1.34916	0.222607	0.000179442	0.00217329
ENSG00000237605	2.35588	-0.556439	0.000180047	0.00217769
ENSG00000261268	1.43095	-0.0773584	0.00018811	0.00226604
ENSG00000142156	1.59794	8.09055	0.000188495	0.00226916
ENSG00000101443	1.82826	0.701953	0.000189326	0.0022761
ENSG00000182600	1.15094	2.73801	0.000192087	0.0023062
ENSG00000236943	1.11958	1.03904	0.000193124	0.0023171
ENSG00000123892	1.06544	5.12197	0.000193367	0.00231846
ENSG00000225255	1.89871	1.16108	0.000198771	0.00237446
ENSG00000068831	1.61259	0.740648	0.000198927	0.00237446
ENSG00000234498	2.63362	1.79258	0.000198964	0.00237446
ENSG00000226823	1.55487	-0.0910813	0.000199951	0.00238466
ENSG00000103528	1.64858	1.12761	0.000204604	0.00243206
ENSG00000101255	1.15007	6.06279	0.000205169	0.00243555
ENSG00000134901	1.12778	4.61436	0.000205652	0.00243806
ENSG00000227279	1.39689	0.265835	0.000206383	0.00244511
ENSG00000175602	1.1117	4.72522	0.0002078	0.00245865
ENSG00000250786	1.10294	3.95311	0.000209416	0.0024745
ENSG00000132470	1.98726	0.0994537	0.000209884	0.00247677
ENSG00000172264	1.71023	1.17646	0.000210694	0.0024847
ENSG00000268041	1.3947	0.113505	0.000211477	0.00248987
ENSG00000213071	1.60942	0.141863	0.000219071	0.00256494
ENSG00000154277	1.0218	6.10602	0.000220369	0.00257844
ENSG00000101197	1.70203	2.90728	0.000231248	0.00269869
ENSG00000204128	1.53287	2.45397	0.000233633	0.00271905
ENSG00000231840	1.83946	0.0526037	0.000233781	0.00271905
ENSG00000158828	1.46551	3.54961	0.000234023	0.00271905
ENSG00000152503	1.56621	0.722218	0.000234053	0.00271905
ENSG00000214269	1.1618	5.84483	0.000235882	0.00273675
ENSG00000163659	1.07187	4.48706	0.000236559	0.00274106
ENSG00000104368	1.27573	6.71332	0.000237588	0.00274765
ENSG00000145725	1.1717	5.67898	0.000240319	0.00277539
ENSG00000145107	1.56268	3.93443	0.000242325	0.00279048
ENSG00000081189	2.35262	0.839664	0.000242492	0.00279048
ENSG00000231203	1.24072	3.7033	0.000247276	0.00283411
ENSG00000185031	1.54677	0.939312	0.000250326	0.00286541
ENSG00000186907	1.27824	2.54714	0.000251561	0.00287771
ENSG00000142303	1.50212	1.1366	0.000253184	0.00289259
ENSG00000144655	1.10872	4.30065	0.000254331	0.00290333
ENSG00000131037	3.85079	0.878501	0.000254448	0.00290333
ENSG00000154027	1.22127	5.33827	0.000255461	0.00291119
ENSG00000169894	2.13056	-0.593232	0.000256492	0.00291827
ENSG00000175463	1.33136	0.309312	0.000256571	0.00291827
ENSG00000153162	1.61639	1.0923	0.000257229	0.0029202
ENSG00000249064	1.44063	1.0911	0.000260704	0.00295404
ENSG00000213452	1.41264	5.07274	0.000262478	0.0029692
ENSG00000231610	1.52774	0.385559	0.000263119	0.00297389
ENSG00000129757	1.20567	3.23273	0.000264303	0.00298539
ENSG00000104881	1.00062	4.58049	0.000264564	0.00298646
ENSG00000165474	1.43592	-0.177631	0.000264987	0.00298747
ENSG00000203497	2.01284	1.52652	0.000267815	0.00301556
ENSG00000155792	2.42848	3.69222	0.000269638	0.00303229
ENSG00000258947	1.11003	1.56428	0.000270862	0.00304392
ENSG00000163898	2.06383	3.06752	0.000271789	0.00304692
ENSG00000125744	1.31434	2.68469	0.000277253	0.00309464
ENSG00000139289	1.00762	7.28916	0.000279193	0.0031119
ENSG00000214533	1.25338	0.587742	0.00027932	0.0031119
ENSG00000233521	3.26309	0.980288	0.00028146	0.00313379
ENSG00000181577	2.51371	0.213843	0.000282927	0.00314232
ENSG00000169136	1.0293	6.15825	0.000285335	0.00316711
ENSG00000115112	1.87897	2.45906	0.000289324	0.00320544
ENSG00000104643	1.08086	4.50757	0.000297246	0.00327753
ENSG00000104237	1.23376	1.2371	0.000303548	0.00333624
ENSG00000182795	1.86639	0.249427	0.000303795	0.00333691
ENSG00000128242	1.869	5.90338	0.000304488	0.00334042
ENSG00000198223	1.36904	3.39858	0.000311451	0.00340433
ENSG00000107562	2.76191	1.00179	0.000311895	0.0034071
ENSG00000135919	1.31906	8.03661	0.000312323	0.0034097
ENSG00000164932	1.31391	6.83645	0.000312936	0.00341224
ENSG00000198915	1.69362	0.761205	0.000315582	0.00343691
ENSG00000204584	1.7044	4.23699	0.000316065	0.00344009
ENSG00000061656	1.38695	2.63361	0.000317036	0.00344856
ENSG00000197251	2.58733	0.221472	0.000324169	0.00351336
ENSG00000178826	1.41604	5.01481	0.000338195	0.00364995
ENSG00000122547	1.23056	2.86062	0.00034091	0.00367482
ENSG00000066697	1.0331	5.18884	0.000341404	0.00367794
ENSG00000133247	1.13965	3.86748	0.000346623	0.00372745
ENSG00000006047	1.28572	5.05737	0.000347849	0.00373839
ENSG00000101846	1.08873	5.14674	0.000349136	0.00374922
ENSG00000197046	2.32	4.36424	0.000349275	0.00374922
ENSG00000100167	1.86112	1.90394	0.000353471	0.00378519
ENSG00000160932	1.21462	6.8764	0.000355306	0.00380259
ENSG00000101198	1.18216	5.1424	0.000355674	0.00380425
ENSG00000005073	1.12226	1.67862	0.000357591	0.00382247
ENSG00000133805	1.87253	-0.051971	0.000359523	0.00383856
ENSG00000110492	1.14451	8.25921	0.000359849	0.00383894
ENSG00000213023	1.27796	2.19794	0.000359988	0.00383894
ENSG00000196950	1.07714	6.82165	0.000367837	0.00390977
ENSG00000168427	1.63578	2.59732	0.000367937	0.00390977
ENSG00000174640	2.34935	2.81397	0.000369335	0.00391997
ENSG00000214517	1.60825	7.76984	0.000370955	0.00393371
ENSG00000103647	1.82651	3.68517	0.000372786	0.00394766
ENSG00000123388	1.38615	0.430099	0.000378229	0.00399311
ENSG00000267761	3.65644	-0.350532	0.000382307	0.0040283
ENSG00000168824	2.32026	1.09098	0.000385104	0.00404901
ENSG00000272221	1.24657	0.910766	0.000393212	0.00412459
ENSG00000138459	1.03232	4.99026	0.000395619	0.00414577
ENSG00000146966	1.04571	3.94249	0.000397572	0.00416301
ENSG00000168056	1.30376	7.13838	0.000401924	0.00420368
ENSG00000156427	2.05818	0.919873	0.000409787	0.00427762
ENSG00000095587	1.37448	2.93422	0.000410121	0.00427762
ENSG00000163739	3.10174	0.48154	0.000410186	0.00427762
ENSG00000135127	1.09768	2.30447	0.000414988	0.004319
ENSG00000142197	1.1298	4.87622	0.000415143	0.004319
ENSG00000204444	1.25509	2.46493	0.00041774	0.00434125
ENSG00000171310	1.16258	4.96619	0.000422766	0.0043884
ENSG00000074966	3.10965	0.452919	0.000428774	0.00443281
ENSG00000064787	1.39138	2.08712	0.00043092	0.00444986
ENSG00000239218	1.47217	-0.13069	0.000433243	0.0044687
ENSG00000260708	1.35402	1.65028	0.00043578	0.00448714
ENSG00000250363	1.30026	0.221385	0.000442521	0.00455132
ENSG00000172752	1.97736	-0.415119	0.000443494	0.00455871
ENSG00000196196	1.41341	2.63508	0.000444805	0.00456957
ENSG00000156218	1.66973	0.21062	0.000462666	0.00472868
ENSG00000131477	1.23901	1.12304	0.000463844	0.00473802
ENSG00000161544	1.79595	-0.0754621	0.000466508	0.00475981
ENSG00000254142	1.85622	1.83864	0.000468085	0.00477048
ENSG00000138606	1.08035	2.7405	0.000478566	0.004869
ENSG00000137393	1.29122	0.726651	0.000482622	0.00490469
ENSG00000072818	1.71598	0.879517	0.000483565	0.00490872
ENSG00000250305	1.13729	2.59159	0.000498747	0.0050457
ENSG00000269501	1.59807	0.254357	0.000499073	0.00504615
ENSG00000124920	1.1324	5.94313	0.000499614	0.00504877
ENSG00000170962	1.26981	3.16263	0.000505506	0.00509993
ENSG00000262001	1.26076	3.1677	0.000505529	0.00509993
ENSG00000197872	1.8184	5.89309	0.000507044	0.00510947
ENSG00000188641	1.08511	4.35582	0.000509266	0.00512897
ENSG00000174939	1.00139	3.92149	0.000515332	0.00517844
ENSG00000180758	1.10483	2.58693	0.000516132	0.00518357
ENSG00000139496	1.02785	6.61371	0.000516624	0.00518561
ENSG00000197959	1.6337	2.75026	0.000518609	0.00519681
ENSG00000250329	1.11344	4.51082	0.000537538	0.00535955
ENSG00000154654	3.19571	0.260339	0.00053868	0.00536795
ENSG00000167105	1.92508	2.22925	0.000542486	0.00539768
ENSG00000146409	1.42271	2.94817	0.000542567	0.00539768
ENSG00000237523	1.3199	3.70217	0.00055104	0.00547894
ENSG00000048740	1.59441	3.43156	0.000554581	0.0055111
ENSG00000151117	2.08756	0.704582	0.000555457	0.00551674
ENSG00000183484	1.26029	1.55098	0.000559943	0.00555822
ENSG00000266179	1.2388	0.321262	0.000562112	0.0055705
ENSG00000263080	1.64517	-0.135358	0.000569782	0.00562785
ENSG00000215386	4.02292	-0.104456	0.000573116	0.00565455
ENSG00000112655	1.00664	5.42447	0.000594238	0.00584367
ENSG00000253549	1.18335	1.71954	0.000595975	0.00585754
ENSG00000240668	1.17624	0.822754	0.000599716	0.00589108
ENSG00000225335	1.61046	0.169828	0.000609949	0.00597197
ENSG00000204396	1.55428	2.80284	0.000615039	0.00601524
ENSG00000251442	1.38885	0.827842	0.000616189	0.0060232
ENSG00000223414	1.4123	0.613432	0.000620992	0.00606355
ENSG00000167103	1.13633	1.45383	0.000622298	0.00606969
ENSG00000246203	1.32175	1.37488	0.000622875	0.00607202
ENSG00000175643	1.16386	4.71592	0.00062722	0.00610773
ENSG00000147894	1.0035	1.54569	0.000631761	0.00614528
ENSG00000180914	1.43173	1.13046	0.000638025	0.00619733
ENSG00000124564	1.09613	3.70339	0.000641125	0.00621614
ENSG00000135002	1.04525	5.69067	0.000652602	0.00631717
ENSG00000147408	1.07176	1.83589	0.000676063	0.00651614
ENSG00000135048	1.16012	6.92629	0.00067679	0.00651965
ENSG00000249795	1.20419	0.426259	0.000678691	0.00653018
ENSG00000260833	1.40773	4.57655	0.000679488	0.00653161
ENSG00000117525	1.08643	2.48885	0.000688065	0.00660343
ENSG00000257113	1.30901	0.375931	0.000696712	0.0066757
ENSG00000165272	1.35172	3.37673	0.000698968	0.00669017
ENSG00000253395	2.00413	0.646479	0.00070155	0.00670773
ENSG00000261005	1.55371	1.1724	0.000705217	0.00673561
ENSG00000179294	1.02666	3.93439	0.000715461	0.00681169
ENSG00000102174	2.1833	0.400814	0.000718859	0.00683678
ENSG00000216819	1.32645	0.997914	0.000727647	0.0069167
ENSG00000255471	1.3563	1.90421	0.000744125	0.00705091
ENSG00000136114	1.11265	4.28854	0.000754808	0.00714523
ENSG00000226046	1.3691	1.08946	0.000759139	0.00717423
ENSG00000228666	1.0192	1.49164	0.000773169	0.00729145
ENSG00000130203	1.35308	6.34794	0.000785102	0.00739621
ENSG00000257281	1.00237	2.13885	0.000786129	0.00739877
ENSG00000165188	3.88879	0.160585	0.000787109	0.00740345
ENSG00000124839	1.08837	2.61564	0.000787591	0.0074041
ENSG00000073910	1.02722	1.75801	0.000800923	0.00751368
ENSG00000085662	1.36202	8.68408	0.000812721	0.00760447
ENSG00000250725	1.09701	1.25982	0.000818323	0.00764364
ENSG00000111087	1.96085	1.79965	0.000828089	0.00771872
ENSG00000177685	1.39922	0.508792	0.000828374	0.00771872
ENSG00000157150	1.41438	3.22584	0.000829242	0.0077228
ENSG00000105711	1.15285	2.06043	0.000830074	0.00772654
ENSG00000269899	1.87591	-0.435059	0.00083184	0.00773896
ENSG00000220505	1.69097	-0.436778	0.000835395	0.00775996
ENSG00000272579	1.32728	1.16265	0.000837937	0.00777552
ENSG00000269728	1.24668	1.53715	0.000862092	0.00797491
ENSG00000220614	1.00457	2.70198	0.000868526	0.00803028
ENSG00000232810	4.68555	0.118263	0.000869965	0.00803944
ENSG00000130751	1.59998	2.6624	0.000875253	0.00807168
ENSG00000002746	1.10908	0.45259	0.000890627	0.0081924
ENSG00000225833	2.44976	-0.546062	0.000891935	0.00820023
ENSG00000108515	1.04734	4.23353	0.000897689	0.0082489
ENSG00000116016	1.21318	5.64566	0.000923996	0.00846029
ENSG00000217272	1.15218	0.967126	0.000933998	0.00854315
ENSG00000155265	2.7037	2.90176	0.000935298	0.00855068
ENSG00000167748	1.31682	2.49442	0.000946051	0.00862701
ENSG00000198366	1.90704	-0.386296	0.000951723	0.00866551
ENSG00000215333	1.19977	0.457139	0.000961442	0.00873351
ENSG00000229662	1.32741	0.157725	0.00100398	0.00909976
ENSG00000162040	1.30999	1.20772	0.00100995	0.00914927
ENSG00000235387	1.0939	0.726156	0.00102033	0.00922465
ENSG00000149926	1.05055	0.770202	0.00102623	0.00926858
ENSG00000160808	2.38813	0.164271	0.00106696	0.00956946
ENSG00000197208	1.40396	0.385226	0.00110315	0.00980247
ENSG00000041982	1.60738	9.88767	0.00110378	0.00980247
ENSG00000100600	1.05006	5.16492	0.00110447	0.00980247
ENSG00000250494	1.28769	-0.0294886	0.00110637	0.00981454
ENSG00000224321	2.43035	0.861274	0.0011189	0.00988987
ENSG00000198732	1.40626	1.57014	0.00112693	0.00993303
ENSG00000251468	1.28343	2.33559	0.00113094	0.00996346
ENSG00000102575	1.71948	7.4399	0.00113205	0.00996385
ENSG00000182687	1.63015	-0.219938	0.00113275	0.00996478
ENSG00000180210	1.57547	-0.150367	0.00115381	0.0101351
ENSG00000115252	1.05028	5.18607	0.00115891	0.0101749
ENSG00000231025	1.27526	1.83959	0.0011607	0.0101857
ENSG00000198088	1.64662	1.16784	0.00116352	0.0101967
ENSG00000115318	1.1866	2.1792	0.00117516	0.0102823
ENSG00000262837	1.47695	1.36312	0.00118771	0.010377
ENSG00000079102	1.96613	0.00924713	0.00119784	0.0104502
ENSG00000111247	1.01359	3.92538	0.0012105	0.0105402
ENSG00000118523	1.62223	5.58347	0.00121227	0.0105505
ENSG00000213100	1.24413	0.141158	0.0012172	0.0105831
ENSG00000172780	1.2652	0.562199	0.00121852	0.0105895
ENSG00000204301	1.11656	0.675794	0.00122112	0.0106069
ENSG00000078804	1.8541	5.79735	0.00123215	0.0106874
ENSG00000100890	1.05805	0.859104	0.00126165	0.0108813
ENSG00000204385	1.59714	2.38275	0.00126648	0.0109111
ENSG00000255633	1.0954	1.3167	0.00126975	0.010934
ENSG00000249166	1.61512	0.697235	0.00127357	0.0109616
ENSG00000065154	1.04011	4.71908	0.00128726	0.0110635
ENSG00000177337	1.29642	2.87643	0.00128946	0.0110759
ENSG00000197249	1.16113	0.758083	0.00129009	0.0110759
ENSG00000114638	1.08773	6.97864	0.00129598	0.0111065
ENSG00000146555	1.56803	0.229371	0.00129913	0.0111258
ENSG00000236751	1.88911	1.89764	0.00130135	0.0111366
ENSG00000258611	1.34686	2.09456	0.00130669	0.0111716
ENSG00000171408	1.07039	2.27428	0.00131529	0.0112398
ENSG00000135838	1.7859	-0.120338	0.00132984	0.0113372
ENSG00000175567	1.36131	7.51917	0.00133087	0.0113405
ENSG00000267898	1.43655	0.352267	0.00136545	0.0115747
ENSG00000205683	1.71353	3.5541	0.00138151	0.0116887
ENSG00000136490	1.01639	5.46531	0.00138554	0.0117118
ENSG00000268785	1.12727	1.01568	0.00138717	0.0117201
ENSG00000130294	1.76791	1.35007	0.0013928	0.011751
ENSG00000147003	1.42144	1.08054	0.00140343	0.011813
ENSG00000105855	1.15104	4.37246	0.00141135	0.0118528
ENSG00000138166	1.31139	6.69994	0.00143653	0.0119958
ENSG00000259359	1.47608	1.73379	0.00145853	0.0121463
ENSG00000108846	1.36567	6.06509	0.00145911	0.0121463
ENSG00000171174	1.16508	3.59467	0.00146306	0.0121721
ENSG00000159166	2.19412	0.572819	0.00147537	0.0122517
ENSG00000203279	1.4812	0.894529	0.00147869	0.0122736
ENSG00000100206	1.22728	4.25457	0.00148082	0.0122856
ENSG00000188760	1.31887	2.84601	0.00149015	0.0123573
ENSG00000269690	1.4641	0.541796	0.00149236	0.0123585
ENSG00000179627	1.30762	2.14218	0.00149705	0.0123873
ENSG00000056487	1.10207	0.505076	0.00152007	0.0125532
ENSG00000143382	1.54933	1.72904	0.00152759	0.0126095
ENSG00000174004	1.26544	1.25096	0.00153055	0.0126281
ENSG00000038945	1.5219	3.53851	0.00153608	0.012657
ENSG00000196154	1.7285	4.45738	0.00153936	0.0126717
ENSG00000182326	1.23466	1.47063	0.00154787	0.01273
ENSG00000074660	1.20328	0.722021	0.00155058	0.0127465
ENSG00000272894	1.1551	1.49154	0.00160106	0.0131254
ENSG00000025423	1.19974	1.25648	0.00160455	0.0131479
ENSG00000102879	1.05651	1.53693	0.00162014	0.0132635
ENSG00000197405	1.52227	1.80845	0.00164273	0.0134179
ENSG00000164125	1.63502	5.2838	0.00166048	0.0135259
ENSG00000270696	1.07171	2.17973	0.00167227	0.0135971
ENSG00000163328	1.15729	1.16619	0.00167376	0.0135971
ENSG00000027075	1.14405	3.55055	0.00169534	0.013719
ENSG00000119888	1.08944	6.07713	0.0017025	0.013762
ENSG00000240541	1.88822	-0.280801	0.00171265	0.0138067
ENSG00000120833	1.46358	1.50816	0.00172712	0.0138859
ENSG00000225077	1.54965	1.72017	0.00176568	0.0141262
ENSG00000128383	1.02897	2.18176	0.00179708	0.0143294
ENSG00000110723	1.31388	1.7396	0.00179833	0.0143299
ENSG00000182504	1.05393	3.86636	0.00182059	0.0144816
ENSG00000127824	1.12181	7.34188	0.00182355	0.0144922
ENSG00000168993	1.88248	1.29278	0.00184413	0.0146095
ENSG00000270762	1.64063	-0.462673	0.00185274	0.0146528
ENSG00000182287	1.03491	4.49656	0.00187318	0.0147884
ENSG00000227533	1.11506	1.13815	0.00187962	0.0148196
ENSG00000128683	1.04889	1.80427	0.00188112	0.014825
ENSG00000146147	2.47595	0.393831	0.00188543	0.0148524
ENSG00000059804	1.3258	4.44624	0.00189654	0.0149072
ENSG00000262888	2.41296	-0.555665	0.00189996	0.014911
ENSG00000106804	1.18531	2.61354	0.00190683	0.014954
ENSG00000255823	1.03054	1.20477	0.00190992	0.0149665
ENSG00000010319	1.35725	0.479043	0.00191523	0.0149885
ENSG00000079385	2.08011	-0.255714	0.00193925	0.0151123
ENSG00000160282	1.14587	1.26843	0.00197698	0.0153518
ENSG00000131018	1.26243	5.79805	0.00197707	0.0153518
ENSG00000162636	1.12721	4.78111	0.00198567	0.0153761
ENSG00000248905	1.13324	3.67532	0.0019862	0.0153761
ENSG00000229124	1.12471	1.36624	0.00200095	0.0154791
ENSG00000238142	1.25782	0.78143	0.0020061	0.0155034
ENSG00000158270	1.72872	4.61556	0.00202102	0.0155852
ENSG00000154639	1.05279	5.52223	0.00203022	0.0156422
ENSG00000172824	1.2908	4.02032	0.00203657	0.0156646
ENSG00000136869	1.497	4.035	0.00204357	0.0156983
ENSG00000130222	1.2947	1.00621	0.00206963	0.015851
ENSG00000157152	1.47146	0.892779	0.00209364	0.0160143
ENSG00000143469	1.73793	0.162582	0.00209785	0.0160329
ENSG00000163762	1.10639	6.85905	0.0021259	0.0162058
ENSG00000130700	1.42332	0.279943	0.00213382	0.0162292
ENSG00000157315	1.02268	0.588074	0.00213392	0.0162292
ENSG00000248429	1.91643	1.16897	0.00214067	0.0162631
ENSG00000215553	1.02253	0.425275	0.00216903	0.0164507
ENSG00000225356	1.10172	4.54677	0.00217129	0.0164609
ENSG00000186056	1.34352	0.308842	0.00219239	0.0165858
ENSG00000074370	1.01306	1.98546	0.00220218	0.0166458
ENSG00000185567	1.10268	7.23724	0.00225173	0.0169632
ENSG00000180638	1.74212	0.848712	0.00229407	0.0172171
ENSG00000182050	1.51976	-0.285677	0.00229867	0.0172371
ENSG00000187955	1.08959	6.98721	0.00232407	0.0173768
ENSG00000138311	1.22127	1.43162	0.00234729	0.0175285
ENSG00000092607	1.44267	0.688964	0.00236999	0.0176538
ENSG00000203326	1.02837	2.46577	0.00237607	0.0176845
ENSG00000166250	1.14831	-0.13867	0.00239545	0.0177992
ENSG00000140795	1.59499	-0.273724	0.00241089	0.0178974
ENSG00000046889	1.53873	3.09491	0.0024219	0.0179511
ENSG00000184809	1.017	2.79529	0.00243462	0.0180379
ENSG00000103067	1.39405	0.43991	0.00244376	0.0180683
ENSG00000141505	1.06297	0.38196	0.00246653	0.0181992
ENSG00000108786	1.04846	0.959208	0.00247453	0.0182432
ENSG00000189127	1.13552	-0.306693	0.00250975	0.0184422
ENSG00000228109	1.25985	2.15175	0.00251328	0.018453
ENSG00000259712	1.53057	-0.126024	0.00254916	0.0186706
ENSG00000168016	1.72737	-0.314624	0.00256725	0.0187878
ENSG00000089127	1.41304	1.42771	0.00257689	0.0188506
ENSG00000241546	1.09966	0.561469	0.00261886	0.0190876
ENSG00000221539	1.13198	-0.0314764	0.00262163	0.0191
ENSG00000237913	1.23411	0.288554	0.00266424	0.019379
ENSG00000132481	1.02549	5.36394	0.0026656	0.019381
ENSG00000005884	1.04361	9.14097	0.00268503	0.0194749
ENSG00000123329	1.26063	0.0229056	0.00269148	0.0195059
ENSG00000239219	1.25959	-0.0791948	0.00273029	0.0197552
ENSG00000162745	1.62186	2.29091	0.00279335	0.0201384
ENSG00000167157	1.53201	1.66191	0.0028361	0.0203974
ENSG00000188487	2.50946	0.378149	0.00285204	0.0204792
ENSG00000157554	1.5645	0.448675	0.00288625	0.0206258
ENSG00000128564	3.58562	6.90686	0.00289944	0.0207035
ENSG00000185900	1.22377	0.0182063	0.00291006	0.0207623
ENSG00000165507	1.30564	0.761657	0.00293331	0.0208706
ENSG00000214900	1.62084	1.09488	0.0029609	0.021041
ENSG00000113721	1.39655	6.61007	0.00298642	0.0211596
ENSG00000086619	1.00764	2.25718	0.0029932	0.0211958
ENSG00000075043	2.34332	2.00611	0.00299759	0.0212185
ENSG00000162144	1.16103	5.19249	0.00301887	0.0213355
ENSG00000271100	1.06475	0.641671	0.00306577	0.021606
ENSG00000271109	1.23324	-0.308709	0.00306679	0.021606
ENSG00000170276	1.0134	1.84058	0.00309993	0.0217772
ENSG00000162039	1.73074	0.0466601	0.00314726	0.0220001
ENSG00000157303	1.59553	0.686996	0.00315864	0.0220644
ENSG00000019186	1.83701	3.53179	0.0031612	0.0220675
ENSG00000179743	1.19117	1.41961	0.00316181	0.0220675
ENSG00000161921	1.81368	0.0520359	0.00320276	0.0223012
ENSG00000269397	1.31008	-0.243039	0.00324795	0.0225633
ENSG00000264107	1.65738	1.53608	0.00329588	0.0228167
ENSG00000233343	1.12881	1.23124	0.00332189	0.022952
ENSG00000000003	1.05942	2.30393	0.00334886	0.0231032
ENSG00000243232	1.26401	2.10294	0.00349024	0.0238857
ENSG00000259330	1.03276	2.47972	0.00355569	0.0242781
ENSG00000224843	1.52829	-0.210923	0.00357856	0.0244156
ENSG00000132031	1.47781	0.637164	0.00366084	0.0248541
ENSG00000112183	1.58572	3.54082	0.00367704	0.0249452
ENSG00000171848	1.11022	7.53504	0.00370187	0.0250852
ENSG00000236682	1.08836	2.19356	0.0037054	0.0250996
ENSG00000267530	1.38688	1.87837	0.0037142	0.0251497
ENSG00000112096	1.0978	7.22094	0.00374468	0.0253274
ENSG00000255408	1.12233	0.640408	0.00375081	0.0253524
ENSG00000272841	1.23406	1.42081	0.00375449	0.0253555
ENSG00000137726	1.48214	1.2047	0.00375961	0.0253806
ENSG00000250221	1.13961	-0.0993258	0.00376636	0.0254166
ENSG00000175305	1.23938	5.13868	0.00377297	0.0254516
ENSG00000243811	1.02025	2.61273	0.00384669	0.0258905
ENSG00000230074	1.53026	1.35597	0.00385807	0.0259499
ENSG00000266928	1.70116	1.24637	0.00386712	0.0259765
ENSG00000065361	1.19325	-0.206743	0.00389819	0.0261497
ENSG00000204219	1.53847	1.37814	0.00394807	0.0264438
ENSG00000266401	1.62992	1.88587	0.00395354	0.0264612
ENSG00000155918	1.51232	0.461834	0.00396422	0.0265124
ENSG00000233559	1.19682	2.23494	0.00397118	0.026549
ENSG00000214145	1.04855	0.0829038	0.00401035	0.0267779
ENSG00000264435	1.01611	0.67321	0.00401139	0.0267779
ENSG00000257556	1.05851	1.81761	0.00402302	0.0268456
ENSG00000131400	1.45656	2.25697	0.00404927	0.0269906
ENSG00000203711	1.36434	2.20484	0.00406415	0.0270798
ENSG00000092068	2.03041	0.273039	0.00408579	0.0271836
ENSG00000180769	1.03061	2.28433	0.0041211	0.0273677
ENSG00000254088	1.16042	1.92099	0.00412553	0.027387
ENSG00000146674	1.16831	7.11418	0.00419254	0.0277493
ENSG00000149564	1.22826	6.26983	0.00419499	0.0277493
ENSG00000131015	1.33249	3.99389	0.00425399	0.0280942
ENSG00000104213	1.16243	0.474176	0.00446148	0.0293241
ENSG00000124942	1.08814	10.2483	0.00446936	0.0293652
ENSG00000263096	1.70675	0.793509	0.00447526	0.0293716
ENSG00000171462	1.09941	1.64572	0.00454505	0.0296885
ENSG00000174460	1.68875	-0.284884	0.00472145	0.0305956
ENSG00000220725	1.0184	0.39548	0.00472906	0.0306118
ENSG00000253547	1.14618	3.19156	0.00474324	0.0306593
ENSG00000119632	1.14435	3.26947	0.00486852	0.0312999
ENSG00000261298	1.71527	3.05718	0.00493433	0.031621
ENSG00000204540	1.38393	0.026841	0.00494868	0.0316708
ENSG00000156966	1.1733	1.51172	0.00495783	0.0317036
ENSG00000101842	1.07309	1.53216	0.00497567	0.031795
ENSG00000144485	1.2029	4.37873	0.00500353	0.0319048
ENSG00000257067	1.35254	0.229031	0.00500531	0.0319048
ENSG00000114200	1.05585	4.01346	0.00514025	0.0325912
ENSG00000119917	1.19791	4.0575	0.00514224	0.0325923
ENSG00000244468	1.63537	-0.288597	0.00519075	0.032793
ENSG00000160318	1.01665	0.767118	0.00520728	0.0328652
ENSG00000157064	1.12247	4.15052	0.00525131	0.0330966
ENSG00000214018	1.10963	6.83173	0.00532007	0.0334359
ENSG00000174010	1.01265	4.11928	0.00543257	0.0340237
ENSG00000173212	1.85339	1.08993	0.00545204	0.0340862
ENSG00000253522	1.59296	2.95837	0.00546327	0.0341326
ENSG00000235139	1.94444	-0.634641	0.00549936	0.0343222
ENSG00000064205	2.15156	-0.35767	0.00552825	0.0344785
ENSG00000259319	1.68191	0.921023	0.0055432	0.0345598
ENSG00000135116	1.91938	2.11958	0.00575003	0.0355526
ENSG00000267279	1.99888	1.15493	0.00578293	0.0357068
ENSG00000246465	1.37266	1.72634	0.0057879	0.0357253
ENSG00000165832	1.0124	5.0363	0.00583087	0.0358425
ENSG00000142623	1.44005	3.68432	0.00586369	0.0360319
ENSG00000099866	1.47641	-0.0533201	0.00593095	0.0363887
ENSG00000267371	1.37485	-0.204309	0.00619596	0.0377119
ENSG00000231655	1.00003	0.360733	0.0062368	0.0379219
ENSG00000172602	1.76093	0.679914	0.00630356	0.0382787
ENSG00000110092	1.3021	8.68535	0.00638566	0.0386958
ENSG00000127561	1.37616	3.3185	0.00640647	0.0387957
ENSG00000272081	1.21601	-0.316116	0.0064312	0.038906
ENSG00000099957	1.19807	1.73566	0.00647943	0.0391318
ENSG00000256018	1.55271	-0.196391	0.00651604	0.0393264
ENSG00000242419	1.49888	1.94258	0.00652773	0.0393705
ENSG00000173898	1.11375	3.30042	0.00655683	0.0395061
ENSG00000160097	1.1566	-0.207641	0.00679999	0.0406301
ENSG00000162510	1.05743	0.239413	0.0068366	0.0407809
ENSG00000174951	1.13771	0.341964	0.00695881	0.0413997
ENSG00000238005	1.60023	0.337428	0.00700364	0.0415837
ENSG00000169760	1.01405	4.51433	0.00701388	0.0416169
ENSG00000079931	1.10332	4.7741	0.00710012	0.0420036
ENSG00000271181	1.20333	4.37353	0.00712473	0.0421214
ENSG00000180869	1.71104	-0.0657757	0.0072169	0.0425401
ENSG00000219607	1.36	2.21317	0.007274	0.0428204
ENSG00000181085	1.32334	-0.216496	0.00728181	0.0428383
ENSG00000259153	1.36137	3.64521	0.00730806	0.0429504
ENSG00000121005	1.25522	0.0880299	0.00734832	0.0430803
ENSG00000270607	1.08099	1.0898	0.00736946	0.0431497
ENSG00000236404	1.0925	1.53256	0.00737237	0.0431497
ENSG00000119514	1.02029	0.870888	0.00741847	0.0433372
ENSG00000178226	1.34749	-0.417859	0.00741871	0.0433372
ENSG00000141753	1.35395	4.87913	0.0074686	0.0435465
ENSG00000166016	1.10989	5.32342	0.00748565	0.0436084
ENSG00000164393	1.71614	0.931304	0.0075149	0.0437361
ENSG00000237517	1.43572	2.9167	0.00756567	0.044003
ENSG00000134962	1.57339	0.94893	0.00773142	0.0447498
ENSG00000235335	1.13481	0.279493	0.00775704	0.0447902
ENSG00000246877	1.6402	-0.25942	0.00785768	0.0452321
ENSG00000258655	1.02157	0.809296	0.00786318	0.045247
ENSG00000123358	1.11031	2.33676	0.00796612	0.0456658
ENSG00000240990	1.41568	-0.0382112	0.00803384	0.0459366
ENSG00000138623	2.09113	5.25597	0.00805799	0.0460427
ENSG00000238065	1.08637	0.126085	0.00807848	0.046133
ENSG00000231982	1.18623	0.0366931	0.00814141	0.0463623
ENSG00000101230	1.43971	2.01149	0.00816577	0.0464457
ENSG00000197580	1.38387	2.56026	0.0081976	0.0465908
ENSG00000146678	1.57692	4.16041	0.00847017	0.0477778
ENSG00000049192	1.59718	0.954013	0.00853395	0.0480909
ENSG00000198624	1.20998	0.0847334	0.00855993	0.0481919
ENSG00000227359	1.03172	1.04824	0.00867376	0.0486496
ENSG00000204531	1.09587	1.29679	0.00868299	0.0486861
ENSG00000226878	1.30118	1.37009	0.00874896	0.0489794
ENSG00000260025	1.17078	1.60666	0.00882911	0.0493511
ENSG00000216775	1.08042	5.15758	0.00884274	0.0493965
ENSG00000132692	1.20254	1.9633	0.00885605	0.0494484
ENSG00000216324	1.0068	0.00548734	0.00898364	0.0499503

## Sheet: Supplementary Table S6B
Supplementary Table S6B. List of genes downregulated between HEC50B cells treated with negative control (NC) siRNA and SETD8 siRNA
Ensembl gene ID	logFC	logCPM	P-value	FDR
ENSG00000140450	-3.02873	2.42089	9.77874e-27	2.19252e-23
ENSG00000115594	-2.08379	7.6486	1.22635e-26	2.1997e-23
ENSG00000183955	-2.14617	4.28782	3.37348e-26	5.04251e-23
ENSG00000232531	-2.36101	2.00585	6.12335e-19	4.77541e-16
ENSG00000106003	-2.06772	5.56282	2.10718e-18	1.45371e-15
ENSG00000185008	-2.66875	4.24659	1.08918e-16	4.94125e-14
ENSG00000183044	-2.39716	0.794711	3.55663e-15	1.15991e-12
ENSG00000151150	-1.7645	3.85695	9.13441e-15	2.6007e-12
ENSG00000184226	-2.39333	2.43801	1.63376e-14	4.18641e-12
ENSG00000154822	-2.3626	2.84468	2.43014e-14	6.04669e-12
ENSG00000135298	-2.06954	2.7232	2.59225e-13	4.79353e-11
ENSG00000230910	-2.74526	0.341396	3.53929e-13	6.22395e-11
ENSG00000165309	-1.61275	3.06039	4.30263e-13	7.42079e-11
ENSG00000157856	-2.40819	0.637481	6.08258e-13	9.93714e-11
ENSG00000184949	-1.92471	2.62584	6.86107e-13	1.10871e-10
ENSG00000187952	-1.65777	2.39534	7.62909e-13	1.20038e-10
ENSG00000243352	-2.96646	3.37816	4.0912e-12	5.11272e-10
ENSG00000154258	-2.99776	-0.371769	4.10454e-12	5.11272e-10
ENSG00000112981	-2.70396	0.199458	6.75251e-12	7.81418e-10
ENSG00000136720	-1.49507	6.41062	8.59124e-12	9.69189e-10
ENSG00000140451	-1.71932	3.83832	1.19835e-11	1.30272e-09
ENSG00000165626	-1.30368	4.32925	1.47045e-11	1.54243e-09
ENSG00000044524	-2.45883	0.796095	1.93274e-11	1.981e-09
ENSG00000184613	-2.40734	0.942083	2.29355e-11	2.3112e-09
ENSG00000189221	-1.70076	1.55177	2.82236e-11	2.76638e-09
ENSG00000178695	-1.98547	0.823144	4.51948e-11	4.11502e-09
ENSG00000103460	-1.83842	5.47334	4.99408e-11	4.45666e-09
ENSG00000204946	-1.4352	4.08512	8.5165e-11	7.37974e-09
ENSG00000223749	-2.42551	6.83077	8.64955e-11	7.45899e-09
ENSG00000171962	-2.27956	2.03091	1.05843e-10	8.91313e-09
ENSG00000266709	-2.18592	5.5438	1.31765e-10	1.08916e-08
ENSG00000170310	-1.35435	3.48558	1.65862e-10	1.34279e-08
ENSG00000117114	2.51859	5.02625	1.67876e-10	1.35031e-08
ENSG00000160179	-2.30323	2.2064	6.1e-16	1.67426e-08
ENSG00000046647	-1.39078	2.66573	2.33835e-10	1.81571e-08
ENSG00000178573	-2.00273	0.849399	3.08984e-10	2.32944e-08
ENSG00000266117	-2.23445	0.208257	3.22101e-10	2.40731e-08
ENSG00000186409	-2.25879	0.281768	3.58288e-10	2.63386e-08
ENSG00000071242	-1.96683	1.91085	5.5504e-10	3.9823e-08
ENSG00000230803	-2.0343	0.650537	7.64819e-10	5.27637e-08
ENSG00000152582	-2.29319	1.78079	7.94171e-10	5.43704e-08
ENSG00000198846	-1.19972	4.1164	1.34045e-09	8.6488e-08
ENSG00000176714	-1.90683	1.85659	1.79464e-09	1.10242e-07
ENSG00000225329	-2.6397	5.46824	2.21939e-09	1.33588e-07
ENSG00000126870	-1.16384	4.62915	2.43949e-09	1.43758e-07
ENSG00000187416	-2.92383	3.13077	2.44446e-09	1.43758e-07
ENSG00000178149	-1.18615	4.57743	3.34225e-09	1.89117e-07
ENSG00000147223	-2.53531	1.94751	3.63094e-09	2.03526e-07
ENSG00000152380	-1.79195	0.909659	4.04412e-09	2.25979e-07
ENSG00000100557	-1.45044	7.07838	5.58109e-09	3.0428e-07
ENSG00000138400	-1.5432	2.1667	6.24098e-09	3.35163e-07
ENSG00000179902	-2.00297	0.425207	8.08213e-09	4.2265e-07
ENSG00000100271	-2.30569	2.00364	9.79372e-09	4.97648e-07
ENSG00000175155	-1.75294	3.56343	1.06086e-08	5.33016e-07
ENSG00000157423	-2.302	2.18028	1.07412e-08	5.38171e-07
ENSG00000132359	-1.37917	5.90838	1.74211e-08	8.33654e-07
ENSG00000172771	-2.11314	0.305424	1.85619e-08	8.81752e-07
ENSG00000166415	-1.57951	4.95009	1.85818e-08	8.81752e-07
ENSG00000101162	-1.78319	0.5366	2.24254e-08	1.04751e-06
ENSG00000129295	-2.06783	1.08655	3.59207e-08	1.57919e-06
ENSG00000176641	-2.0557	0.796755	4.08482e-08	1.76553e-06
ENSG00000203780	-2.31604	0.0242109	4.19256e-08	1.78627e-06
ENSG00000168890	-1.19295	3.19524	4.45424e-08	1.8711e-06
ENSG00000081177	-1.08695	3.63494	4.79708e-08	2.00105e-06
ENSG00000151789	-2.68159	0.885274	5.43974e-08	2.25341e-06
ENSG00000153976	-2.01782	1.32	5.51523e-08	2.27942e-06
ENSG00000181619	-1.56911	0.948909	5.53778e-08	2.28146e-06
ENSG00000138036	-1.18646	4.56313	7.54508e-08	2.94209e-06
ENSG00000141750	-1.44719	1.61437	8.35408e-08	3.23644e-06
ENSG00000197182	-1.73088	1.1203	8.49464e-08	3.28017e-06
ENSG00000163818	-1.43251	4.08309	8.62675e-08	3.31345e-06
ENSG00000215417	-1.52161	2.4294	8.93538e-08	3.40284e-06
ENSG00000153832	-2.16001	2.51655	8.99136e-08	3.41691e-06
ENSG00000102904	-1.72418	1.14692	9.25538e-08	3.47309e-06
ENSG00000130023	-1.20613	3.17031	9.30704e-08	3.48519e-06
ENSG00000163884	-1.87801	0.622127	1.04005e-07	3.84647e-06
ENSG00000122970	-1.1117	4.68238	1.25225e-07	4.52855e-06
ENSG00000092850	-1.52126	2.13104	1.43567e-07	5.0692e-06
ENSG00000234184	-2.24121	-0.365971	1.4397e-07	5.0723e-06
ENSG00000254685	-1.19349	3.52827	1.52896e-07	5.36692e-06
ENSG00000118307	-2.20501	1.2267	1.86418e-07	6.3513e-06
ENSG00000153237	-1.38919	1.06911	2.0318e-07	6.85044e-06
ENSG00000259820	-1.02478	4.70432	2.18888e-07	7.29774e-06
ENSG00000118690	-1.32392	1.62903	2.24434e-07	7.46879e-06
ENSG00000147488	-1.20905	3.32234	2.51903e-07	8.35192e-06
ENSG00000164638	-1.23536	4.44743	3.60291e-07	1.15609e-05
ENSG00000269113	-1.72018	5.17827	3.96778e-07	1.25299e-05
ENSG00000137098	-1.97485	0.793046	4.90163e-07	1.51326e-05
ENSG00000075891	-1.19506	4.24613	5.20131e-07	1.58937e-05
ENSG00000032742	-1.21749	3.74963	5.69796e-07	1.71196e-05
ENSG00000197459	-1.42961	0.970001	5.81233e-07	1.7376e-05
ENSG00000133195	-1.2944	4.00308	7.9817e-07	2.28702e-05
ENSG00000126217	-1.49029	2.77475	9.3561e-07	2.64284e-05
ENSG00000125247	-1.23246	4.19538	1.13885e-06	3.13305e-05
ENSG00000048471	-1.13826	5.28871	1.15263e-06	3.16613e-05
ENSG00000135119	-1.27217	2.28656	1.17417e-06	3.21052e-05
ENSG00000270605	-1.47352	1.13055	1.32689e-06	3.58981e-05
ENSG00000183833	-1.65776	1.24781	1.43624e-06	3.85079e-05
ENSG00000144061	-1.37072	3.22404	1.45753e-06	3.89623e-05
ENSG00000137203	-1.26669	5.48208	1.49225e-06	3.97564e-05
ENSG00000133640	-2.35126	1.85084	1.56959e-06	4.14635e-05
ENSG00000157353	-1.04706	3.80594	1.75075e-06	4.5446e-05
ENSG00000102547	-1.3087	1.11833	1.77053e-06	4.5893e-05
ENSG00000168734	-1.11663	3.87285	1.87284e-06	4.83354e-05
ENSG00000160172	-1.16996	3.37547	1.9555e-06	5.01083e-05
ENSG00000148400	-1.24091	5.14077	2.00208e-06	5.10829e-05
ENSG00000128694	-1.11198	4.15046	2.03742e-06	5.17639e-05
ENSG00000197748	-1.87153	0.0213465	2.31438e-06	5.77371e-05
ENSG00000122033	-1.17764	3.3868	2.33992e-06	5.82123e-05
ENSG00000168778	-1.36977	4.33643	2.70912e-06	6.67493e-05
ENSG00000228727	-1.73738	0.310355	2.83926e-06	6.91955e-05
ENSG00000214278	-1.32759	1.6877	2.86997e-06	6.97543e-05
ENSG00000166821	-1.0898	2.81725	2.9965e-06	7.25348e-05
ENSG00000138002	-1.56383	4.33752	3.38798e-06	8.01718e-05
ENSG00000090776	-1.03215	3.22725	3.43498e-06	8.09636e-05
ENSG00000272216	-1.7921	0.776391	3.44762e-06	8.09637e-05
ENSG00000272191	-1.63866	0.538654	3.54409e-06	8.27045e-05
ENSG00000141519	-1.04991	3.02984	3.7714e-06	8.70626e-05
ENSG00000187535	-1.05927	4.23544	4.98155e-06	0.000109637
ENSG00000152926	-1.14686	1.918	5.39573e-06	0.000118028
ENSG00000168916	-1.1282	5.99384	6.00384e-06	0.000129436
ENSG00000150433	-1.02357	4.0072	6.09612e-06	0.000131268
ENSG00000140104	-1.14161	3.66324	7.18753e-06	0.000151318
ENSG00000118997	-1.70004	2.12176	7.29759e-06	0.000153096
ENSG00000163093	-1.07586	3.48434	7.31305e-06	0.000153241
ENSG00000188452	-1.14859	1.47535	7.45271e-06	0.00015526
ENSG00000256061	-1.77083	-0.0499955	7.49677e-06	0.000155997
ENSG00000160216	-1.72279	2.44793	8.21775e-06	0.000169233
ENSG00000177640	-1.78142	1.31107	8.63949e-06	0.000176701
ENSG00000123119	-1.07201	3.94309	9.03664e-06	0.000183568
ENSG00000162927	-1.02671	2.69785	9.04797e-06	0.00018359
ENSG00000134709	-1.43809	5.96948	9.41894e-06	0.000188979
ENSG00000176371	-1.01169	3.02778	1.14685e-05	0.000223114
ENSG00000114670	-1.556	2.28835	1.14825e-05	0.000223144
ENSG00000125246	-1.00713	2.45023	1.22354e-05	0.000235226
ENSG00000173947	-1.89675	1.88946	1.25899e-05	0.000241009
ENSG00000135697	-1.0127	3.0625	1.35429e-05	0.000256514
ENSG00000106479	-1.19396	1.52565	1.43789e-05	0.000270028
ENSG00000005249	-1.07783	3.61108	1.45777e-05	0.000272943
ENSG00000230280	-1.76052	-0.0699551	1.46718e-05	0.000273847
ENSG00000188596	-1.57211	0.0208918	1.55282e-05	0.00028744
ENSG00000249506	-1.4265	1.86769	1.70392e-05	0.000312189
ENSG00000272214	-1.46584	1.28556	1.72404e-05	0.000315231
ENSG00000077063	-1.34456	6.28466	1.84642e-05	0.000332856
ENSG00000173930	-1.23129	3.14235	1.89217e-05	0.000339738
ENSG00000121207	-1.27983	1.10631	1.90636e-05	0.000341602
ENSG00000165646	-1.08832	2.97014	2.01201e-05	0.000357489
ENSG00000144283	-1.33316	7.73721	2.04317e-05	0.000360561
ENSG00000169554	-1.30166	5.91963	2.07051e-05	0.000364462
ENSG00000158457	-1.02736	3.92374	2.1112e-05	0.000370173
ENSG00000174628	-1.22073	3.38223	2.28619e-05	0.000395061
ENSG00000117289	-2.64798	4.02933	2.37933e-05	0.000407475
ENSG00000169783	-1.29424	4.15009	2.51038e-05	0.000422013
ENSG00000205795	-1.51498	1.17175	2.55963e-05	0.000429085
ENSG00000236671	-1.23419	0.834181	2.71288e-05	0.000452659
ENSG00000116885	-1.60831	2.82682	2.82022e-05	0.000467959
ENSG00000111554	-1.00386	3.98779	2.93124e-05	0.000483695
ENSG00000215126	-1.07124	2.93888	3.08389e-05	0.000503787
ENSG00000151575	-1.14759	1.71087	3.40047e-05	0.000546543
ENSG00000091831	-1.42384	0.0197643	3.61525e-05	0.000573357
ENSG00000197566	-1.08052	2.74856	3.65163e-05	0.000577684
ENSG00000169131	-1.0552	3.40094	3.80067e-05	0.000596436
ENSG00000115423	-1.95046	0.424214	3.80624e-05	0.000596788
ENSG00000220785	-1.06907	2.37921	3.93526e-05	0.000615403
ENSG00000120162	-1.43877	-0.0368913	3.9697e-05	0.000620248
ENSG00000169598	-1.22076	1.96549	4.03326e-05	0.000628537
ENSG00000054965	-1.08642	6.4491	4.1435e-05	0.000639836
ENSG00000099251	-1.18977	1.18628	4.14501e-05	0.000639836
ENSG00000130224	-1.05176	3.43369	4.15861e-05	0.000640976
ENSG00000213420	-1.19821	0.782734	4.16035e-05	0.000640976
ENSG00000229670	-1.28676	5.98378	4.17402e-05	0.000642105
ENSG00000198208	-1.09043	3.3801	4.21557e-05	0.000647386
ENSG00000134215	-1.0514	7.52163	4.40387e-05	0.000672274
ENSG00000188206	-1.05292	2.41467	4.51457e-05	0.000687417
ENSG00000266753	-1.57434	0.00977044	4.54934e-05	0.000690917
ENSG00000271533	-1.41274	1.03072	4.66769e-05	0.000707729
ENSG00000125430	-1.81046	6.29613	4.69327e-05	0.000711007
ENSG00000074964	-1.27135	5.16678	4.69725e-05	0.000711009
ENSG00000235142	-1.11019	4.27138	4.76363e-05	0.000719257
ENSG00000156345	-1.23311	3.43156	4.77045e-05	0.000719257
ENSG00000105792	-1.80349	1.45508	4.94378e-05	0.000742063
ENSG00000225028	-1.66835	-0.172502	4.97376e-05	0.000744693
ENSG00000109680	-1.02411	1.6062	5.00771e-05	0.000748528
ENSG00000214106	-1.24776	1.64002	5.06652e-05	0.00075543
ENSG00000144504	-1.00123	4.01818	5.29235e-05	0.000784121
ENSG00000116138	-1.03654	4.666	5.40803e-05	0.000799043
ENSG00000248560	-1.26036	2.01167	5.67668e-05	0.000832825
ENSG00000175414	-1.06915	3.56651	6.24643e-05	0.000903566
ENSG00000164675	-1.51335	0.854334	6.26023e-05	0.000904833
ENSG00000157388	-1.3317	0.00914238	6.43331e-05	0.000928353
ENSG00000005108	-1.22947	1.78566	6.50893e-05	0.000937757
ENSG00000244617	-1.50837	-0.182742	7.16314e-05	0.00101892
ENSG00000213123	-1.26471	0.611205	7.23017e-05	0.00102682
ENSG00000238081	-1.18275	1.30977	7.55162e-05	0.00106489
ENSG00000136828	-1.0072	2.89479	8.48014e-05	0.00117458
ENSG00000162600	-1.29349	4.02152	8.52916e-05	0.00117955
ENSG00000266490	-1.51013	-0.0950195	8.57819e-05	0.00118542
ENSG00000112874	-1.10132	3.0395	8.80093e-05	0.00120598
ENSG00000163617	-1.62868	1.70303	9.01203e-05	0.0012302
ENSG00000140057	-1.44713	0.199516	9.97892e-05	0.00133476
ENSG00000175745	-1.52117	1.18986	0.000105487	0.00140262
ENSG00000004838	-2.06597	1.8694	0.000110545	0.00145797
ENSG00000089091	-1.0429	2.77058	0.000117693	0.00154205
ENSG00000119636	-1.49836	0.361879	0.000122444	0.00159613
ENSG00000161912	-1.1993	0.583975	0.000125794	0.00163032
ENSG00000160961	-1.02522	2.78591	0.000147031	0.00184169
ENSG00000184508	-1.07327	3.18748	0.000148374	0.00185463
ENSG00000066735	-1.35632	5.47666	0.000153673	0.00191125
ENSG00000144730	-1.10617	1.91239	0.000157051	0.00194179
ENSG00000184343	-1.15605	0.740817	0.000160551	0.00197789
ENSG00000179981	-1.53936	5.37016	0.00016692	0.00204372
ENSG00000241388	-1.27196	1.79693	0.000167582	0.00204902
ENSG00000140284	-1.18944	2.57675	0.000176117	0.00214025
ENSG00000204104	-1.17392	4.99692	0.000178255	0.00216184
ENSG00000065029	-1.13231	4.45649	0.000179715	0.00217513
ENSG00000134864	-1.3951	0.58256	0.000182347	0.00220254
ENSG00000203727	-1.28755	2.99786	0.000182685	0.00220513
ENSG00000256087	-1.00072	1.9487	0.000194652	0.00233232
ENSG00000112419	-1.02803	4.45039	0.000197572	0.00236257
ENSG00000145416	-1.20594	1.82751	0.000201352	0.00239977
ENSG00000144134	-1.03652	3.91962	0.000223999	0.00261751
ENSG00000188010	-1.35693	3.712	0.000236243	0.00273917
ENSG00000001626	-1.26598	0.147049	0.000237263	0.00274567
ENSG00000205212	-1.18909	1.26566	0.000251953	0.00288035
ENSG00000228611	-1.02878	1.20681	0.000255178	0.00290981
ENSG00000134317	-1.05462	2.04887	0.000264915	0.00298747
ENSG00000176896	-1.11494	0.369573	0.000268499	0.00302137
ENSG00000165475	-1.43373	2.78597	0.000271351	0.00304392
ENSG00000179921	-1.55485	1.01817	0.000281924	0.00313507
ENSG00000164707	-1.09473	1.09236	0.000286239	0.00317322
ENSG00000261188	-1.19031	1.55098	0.000295558	0.00326241
ENSG00000226383	-1.00453	1.85495	0.000304034	0.00333749
ENSG00000159496	-1.4311	-0.118444	0.000308056	0.00337338
ENSG00000237873	-1.02577	1.40265	0.000314207	0.00342402
ENSG00000260822	-1.13722	0.75753	0.000317597	0.00345257
ENSG00000107984	-1.59596	6.04653	0.000364958	0.00388501
ENSG00000205356	-1.23709	4.34788	0.000365868	0.0038924
ENSG00000148225	-1.54336	-0.0866564	0.000383436	0.0040362
ENSG00000203865	-1.08214	0.927219	0.000388148	0.00407862
ENSG00000175395	-1.53623	2.55525	0.000392947	0.00412422
ENSG00000143924	-1.33783	7.71394	0.000395694	0.00414577
ENSG00000186868	-1.12248	0.468464	0.000427072	0.00442423
ENSG00000239415	-1.01111	1.19802	0.000427276	0.00442423
ENSG00000270296	-1.0043	0.793988	0.000430133	0.0044443
ENSG00000171759	-1.46553	3.95055	0.000445196	0.00457087
ENSG00000006611	-1.05412	3.71652	0.000445442	0.00457087
ENSG00000162755	-1.13437	1.84369	0.000450003	0.00460977
ENSG00000003147	-1.17216	0.54081	0.000458475	0.00469119
ENSG00000183914	-1.12184	2.18808	0.000496451	0.00503098
ENSG00000184260	-1.36956	-0.399569	0.000496917	0.00503286
ENSG00000165659	-1.11276	4.70416	0.000517494	0.00518854
ENSG00000185774	-1.2371	0.225239	0.000561885	0.0055705
ENSG00000165115	-1.00259	1.89008	0.000568903	0.00562226
ENSG00000253919	-1.05488	3.75586	0.000581667	0.00573262
ENSG00000248932	-1.25151	-0.216463	0.000586866	0.00577433
ENSG00000100228	-1.00345	3.74865	0.000622134	0.00606969
ENSG00000166352	-1.00467	1.26833	0.000635736	0.00618059
ENSG00000134146	-1.06303	3.17717	0.000669012	0.00645512
ENSG00000100218	-1.15745	0.726704	0.00070393	0.0067269
ENSG00000248835	-1.17299	2.05249	0.000713615	0.00679773
ENSG00000248008	-1.11623	4.48095	0.000781856	0.00736949
ENSG00000167646	-1.09122	1.24409	0.000792079	0.00744239
ENSG00000140022	-1.01742	3.26282	0.000804888	0.00754299
ENSG00000137492	-1.00815	6.3315	0.00083714	0.00777214
ENSG00000106336	-1.29206	-0.336764	0.000852908	0.00790493
ENSG00000013016	-1.15208	1.98027	0.000853205	0.00790493
ENSG00000114473	-1.3991	3.42818	0.000936124	0.00855388
ENSG00000162814	-1.43216	1.31272	0.00100331	0.00909822
ENSG00000107020	-1.08363	2.34494	0.00101084	0.00915266
ENSG00000103351	-1.01895	4.38953	0.0010631	0.00954393
ENSG00000152763	-1.15844	0.167192	0.00109644	0.00977479
ENSG00000142065	-1.04828	1.73423	0.00116688	0.0102199
ENSG00000266930	-1.29888	-0.325802	0.00121028	0.0105402
ENSG00000106012	-1.30489	4.84576	0.0012451	0.0107891
ENSG00000242110	-1.26768	4.48498	0.00132202	0.0112886
ENSG00000172367	-1.00863	0.944283	0.00132961	0.0113372
ENSG00000116151	-1.07236	2.17889	0.00135998	0.0115447
ENSG00000162869	-1.02508	4.36014	0.00141415	0.0118586
ENSG00000157796	-1.06429	4.77189	0.00141533	0.011863
ENSG00000237325	-1.24014	0.728966	0.00150263	0.0124149
ENSG00000141040	-1.02571	1.09279	0.00166245	0.0135358
ENSG00000227972	-1.28122	1.33625	0.00167122	0.0135948
ENSG00000099954	-1.14214	0.761671	0.00171009	0.0138047
ENSG00000149050	-1.00255	0.489666	0.00183872	0.0145741
ENSG00000185345	-1.05239	0.541363	0.00185723	0.0146818
ENSG00000168026	-1.21505	2.44914	0.00187595	0.0148037
ENSG00000231793	-1.13372	0.0750493	0.0018923	0.0148869
ENSG00000259429	-1.04079	0.646287	0.00189365	0.014891
ENSG00000254911	-1.33215	1.13666	0.00190035	0.014911
ENSG00000166323	-1.23034	-0.190472	0.00193683	0.0151113
ENSG00000111452	-1.08936	3.63863	0.00193922	0.0151123
ENSG00000178053	-1.25607	3.31819	0.00198266	0.0153737
ENSG00000117971	-1.11403	1.19129	0.00198543	0.0153761
ENSG00000144306	-1.06488	4.56004	0.00200203	0.0154791
ENSG00000227121	-1.06234	3.84022	0.00203211	0.0156438
ENSG00000109756	-1.08253	4.44331	0.00204534	0.0157052
ENSG00000204815	-1.13664	1.6785	0.00213354	0.0162292
ENSG00000064199	-1.35405	1.98443	0.00214456	0.0162858
ENSG00000130684	-1.04894	0.440736	0.00223553	0.0168553
ENSG00000137845	-1.04735	7.32237	0.00227836	0.0171206
ENSG00000204778	-1.0083	0.0660027	0.00243895	0.0180557
ENSG00000164406	-1.12424	0.00414704	0.00260366	0.0189972
ENSG00000201678	-1.14655	-0.192728	0.00267014	0.0193963
ENSG00000163959	-1.13806	-0.0518027	0.0027646	0.0199713
ENSG00000205710	-1.13232	-0.269392	0.0027726	0.020021
ENSG00000166762	-1.13952	2.12278	0.00278873	0.0201213
ENSG00000135299	-1.11222	0.164809	0.00280039	0.0201729
ENSG00000223745	-1.10622	3.25817	0.00283367	0.0203881
ENSG00000187624	-1.52383	2.77659	0.00285513	0.0204852
ENSG00000117318	-1.13627	6.23828	0.00286722	0.0205307
ENSG00000262194	-1.08119	0.0879076	0.00291792	0.0207858
ENSG00000164776	-1.23666	-0.337357	0.0031263	0.0218963
ENSG00000173013	-1.32155	0.343873	0.00317654	0.0221616
ENSG00000206432	-1.03268	2.16363	0.00320538	0.0223108
ENSG00000236797	-1.03522	1.52504	0.0033246	0.0229536
ENSG00000214954	-1.02086	0.166109	0.00340134	0.0234023
ENSG00000166341	-1.24266	0.336174	0.00343252	0.0235536
ENSG00000174928	-1.08803	1.52796	0.00360438	0.0245358
ENSG00000100583	-1.59311	1.88767	0.00361219	0.0245609
ENSG00000240137	-1.18053	-0.206667	0.00369311	0.0250353
ENSG00000129103	-1.03275	7.16694	0.00438201	0.0288759
ENSG00000207650	-1.00771	0.733684	0.00441057	0.0290427
ENSG00000081051	-1.53198	2.61961	0.00454171	0.0296775
ENSG00000170370	-1.39198	0.240718	0.00456549	0.0297895
ENSG00000228243	-1.27719	-0.344798	0.00556237	0.0346422
ENSG00000158423	-1.16091	1.49804	0.0058169	0.0358361
ENSG00000148814	-1.01185	1.4886	0.00616207	0.0375482
ENSG00000203414	-1.0058	-0.000352706	0.00664851	0.0399646
ENSG00000101384	-1.19188	7.39783	0.00686143	0.0409154
ENSG00000123364	-1.07489	2.21468	0.00710587	0.0420237
ENSG00000178662	-1.16356	0.21455	0.0071877	0.0424098
ENSG00000115539	-1.03092	3.11814	0.00773692	0.0447668
ENSG00000231240	-1.03502	0.274575	0.00789378	0.0453526
ENSG00000153982	-1.33273	0.692626	0.00792759	0.0455031
ENSG00000236247	-1.02949	0.3057	0.00808287	0.0461434

## Sheet: Supplementary Table S6C
Supplementary Table S6C. List of genes upregulated between HEC1B cells treated with negative control (NC) siRNA and SETD8 siRNA
Ensembl gene ID	logFC	logCPM	P-value	FDR
ENSG00000176907	2.39498	6.42035	9.2665e-31	8.31066e-27
ENSG00000189120	3.19488	2.82336	6.15022e-29	3.67722e-25
ENSG00000115380	2.34548	5.17714	4.32367e-28	1.93884e-24
ENSG00000163577	2.69064	5.022	2.12465e-25	7.62195e-22
ENSG00000120129	2.16406	4.68481	1.63011e-23	4.68411e-20
ENSG00000135925	3.45121	2.23074	1.828e-23	4.68411e-20
ENSG00000019582	3.56383	3.61166	2.82227e-23	6.20947e-20
ENSG00000132561	3.17814	4.16269	3.11564e-23	6.20947e-20
ENSG00000141682	3.15266	4.94428	3.84537e-23	6.89744e-20
ENSG00000135678	3.03049	6.33325	1.98378e-22	2.96525e-19
ENSG00000179388	4.41132	0.860614	2.18783e-22	3.0187e-19
ENSG00000110435	1.995	5.59209	1.59772e-21	2.04702e-18
ENSG00000073737	4.10149	3.53193	3.24779e-21	3.88371e-18
ENSG00000108821	3.20211	10.3248	4.68493e-20	5.2521e-17
ENSG00000164211	3.00092	3.09912	1.05207e-19	1.04839e-16
ENSG00000081087	2.02902	6.10502	1.24436e-19	1.17474e-16
ENSG00000163453	2.43023	6.48369	3.31722e-19	2.97505e-16
ENSG00000155629	2.63728	5.17166	5.25414e-19	4.30081e-16
ENSG00000173918	3.39503	1.8449	5.27501e-19	4.30081e-16
ENSG00000124143	3.13104	1.49027	9.79665e-19	7.64011e-16
ENSG00000135127	3.13341	2.30447	1.96795e-18	1.4708e-15
ENSG00000143162	2.20183	5.51155	2.24065e-18	1.60762e-15
ENSG00000118515	2.43739	5.05649	4.61527e-18	3.184e-15
ENSG00000171223	2.59124	4.89187	1.08076e-17	7.17985e-15
ENSG00000144452	2.97285	4.29111	1.36242e-16	8.72775e-14
ENSG00000074527	3.09744	3.61	1.60136e-16	9.9047e-14
ENSG00000251322	2.6042	2.43387	1.71264e-16	1.02399e-13
ENSG00000065320	3.71962	3.11898	1.87084e-16	1.08249e-13
ENSG00000198576	2.48142	2.38959	2.35828e-16	1.32189e-13
ENSG00000013588	2.27693	4.80181	2.79869e-16	1.48854e-13
ENSG00000102218	2.00041	4.0807	2.82156e-16	1.48854e-13
ENSG00000136235	3.41382	2.58092	3.81284e-16	1.95402e-13
ENSG00000131979	2.51859	2.83358	5.01916e-16	2.5008e-13
ENSG00000124568	2.42054	2.00315	6.09718e-16	2.87803e-13
ENSG00000116661	1.973	3.33672	7.73932e-16	3.55949e-13
ENSG00000243566	3.12169	3.09085	8.4478e-16	3.78821e-13
ENSG00000145287	2.28302	3.86246	9.51934e-16	4.16459e-13
ENSG00000120875	2.29169	4.2265	1.39688e-15	5.96569e-13
ENSG00000105696	3.516	2.05828	2.39096e-15	9.97365e-13
ENSG00000182118	2.74956	3.05862	3.31834e-15	1.35275e-12
ENSG00000108813	2.52017	3.50238	4.40124e-15	1.75434e-12
ENSG00000121966	3.48287	1.47614	5.13636e-15	2.00284e-12
ENSG00000131435	2.51303	2.41847	6.75642e-15	2.57851e-12
ENSG00000148926	1.7915	3.54621	7.82775e-15	2.92513e-12
ENSG00000147234	3.56035	0.65383	1.04648e-14	3.63523e-12
ENSG00000007264	3.38023	1.10533	1.05266e-14	3.63523e-12
ENSG00000137393	3.61832	0.726651	1.05387e-14	3.63523e-12
ENSG00000204954	2.00735	3.70914	1.12252e-14	3.799e-12
ENSG00000112139	3.30598	1.84155	1.50095e-14	4.98564e-12
ENSG00000136826	2.3275	2.54043	1.82481e-14	5.95119e-12
ENSG00000170689	2.10618	5.36338	2.05721e-14	6.58933e-12
ENSG00000078900	2.40211	2.7958	2.18441e-14	6.87398e-12
ENSG00000169252	2.06265	2.39957	2.77216e-14	8.57314e-12
ENSG00000073910	3.09812	1.75801	2.83432e-14	8.61681e-12
ENSG00000163803	2.49399	1.96859	4.13271e-14	1.23547e-11
ENSG00000152332	2.08202	6.66526	5.51061e-14	1.62039e-11
ENSG00000177679	2.8222	2.4408	6.10414e-14	1.76597e-11
ENSG00000128510	6.14652	3.45511	6.48446e-14	1.84622e-11
ENSG00000141429	1.71092	5.91429	7.53448e-14	2.11166e-11
ENSG00000260576	2.01004	2.75783	1.09948e-13	3.03406e-11
ENSG00000125740	2.71346	3.52786	1.14232e-13	3.1045e-11
ENSG00000105971	2.41238	6.01981	1.27828e-13	3.42217e-11
ENSG00000130635	2.4103	3.06579	1.37065e-13	3.52469e-11
ENSG00000170113	1.91659	5.55136	1.37099e-13	3.52469e-11
ENSG00000100311	2.00445	4.77723	1.39493e-13	3.52469e-11
ENSG00000027075	2.99267	3.55055	1.39518e-13	3.52469e-11
ENSG00000171992	1.62086	6.19899	1.43346e-13	3.57111e-11
ENSG00000153292	3.28881	1.62112	1.80258e-13	4.42917e-11
ENSG00000169398	1.37969	7.39671	2.34435e-13	5.68253e-11
ENSG00000104369	2.83524	1.72025	2.53426e-13	6.06093e-11
ENSG00000144834	2.98943	3.22623	2.60058e-13	6.13771e-11
ENSG00000231948	3.29258	1.35771	3.73545e-13	8.5901e-11
ENSG00000125726	1.6033	6.27242	3.86567e-13	8.77702e-11
ENSG00000150593	2.11623	5.43345	6.23097e-13	1.37981e-10
ENSG00000170477	4.87846	0.93398	6.44383e-13	1.40955e-10
ENSG00000133985	2.86516	1.63345	6.932e-13	1.49806e-10
ENSG00000269976	3.84719	0.384124	7.16693e-13	1.5304e-10
ENSG00000128917	4.16731	-0.015042	7.90493e-13	1.66813e-10
ENSG00000184363	1.88394	2.22297	8.16546e-13	1.70307e-10
ENSG00000101134	2.83183	3.21035	9.64758e-13	1.98906e-10
ENSG00000064195	5.27852	0.0171442	9.82702e-13	2.00304e-10
ENSG00000134470	3.93032	0.589348	1.00375e-12	2.02296e-10
ENSG00000116675	1.97918	3.86129	1.1658e-12	2.32345e-10
ENSG00000170345	2.36323	3.42171	1.24806e-12	2.46004e-10
ENSG00000101680	1.68462	3.61985	1.57155e-12	3.06402e-10
ENSG00000182379	2.00975	3.81124	2.05481e-12	3.96314e-10
ENSG00000198478	3.83698	0.354658	2.11756e-12	4.04072e-10
ENSG00000182752	3.01415	0.448458	2.33502e-12	4.40877e-10
ENSG00000109472	2.04389	3.09927	2.43026e-12	4.54078e-10
ENSG00000134668	2.09573	1.64758	2.63846e-12	4.87898e-10
ENSG00000189068	3.82061	0.318636	3.50587e-12	6.41682e-10
ENSG00000140968	1.52026	3.97411	4.11636e-12	7.45809e-10
ENSG00000178947	2.02666	1.67394	4.36224e-12	7.82455e-10
ENSG00000105088	2.93845	3.13014	4.81782e-12	8.55616e-10
ENSG00000168394	1.73139	4.62416	5.03711e-12	8.8579e-10
ENSG00000125354	1.7457	2.92761	5.5632e-12	9.68807e-10
ENSG00000119048	1.42965	5.27863	8.11392e-12	1.39942e-09
ENSG00000130545	3.1912	1.37283	8.95099e-12	1.52908e-09
ENSG00000204128	3.27273	2.45397	9.69167e-12	1.64e-09
ENSG00000149131	2.3556	3.0693	1.09492e-11	1.83547e-09
ENSG00000179111	2.71818	1.38245	1.25867e-11	2.09044e-09
ENSG00000115596	4.33169	1.18408	1.31054e-11	2.15661e-09
ENSG00000178082	1.25752	5.87895	1.33091e-11	2.17022e-09
ENSG00000171236	3.46827	0.882507	1.37797e-11	2.22672e-09
ENSG00000142634	1.67449	5.44126	1.69871e-11	2.70869e-09
ENSG00000188910	3.75453	-0.00635403	1.70643e-11	2.70869e-09
ENSG00000111424	1.88804	3.46347	1.72525e-11	2.71454e-09
ENSG00000078246	1.65987	4.77544	1.7816e-11	2.77884e-09
ENSG00000168917	2.52621	3.5657	1.85497e-11	2.86833e-09
ENSG00000103196	2.35603	3.28634	1.95218e-11	2.96748e-09
ENSG00000134873	2.34261	3.67884	2.22208e-11	3.34936e-09
ENSG00000143367	1.42459	4.50717	2.2933e-11	3.42791e-09
ENSG00000114638	2.38441	6.97864	2.45945e-11	3.64588e-09
ENSG00000122035	2.06548	2.44721	2.71546e-11	3.99239e-09
ENSG00000100342	4.68285	2.74564	2.98703e-11	4.35596e-09
ENSG00000187688	2.34815	5.01186	3.23522e-11	4.67984e-09
ENSG00000221890	2.66471	6.15533	3.27081e-11	4.69349e-09
ENSG00000145012	2.18997	7.32324	3.3743e-11	4.80356e-09
ENSG00000137868	3.97643	0.101795	3.61885e-11	5.11113e-09
ENSG00000149599	3.7834	0.338199	3.71168e-11	5.20128e-09
ENSG00000197594	1.77842	3.4777	3.83223e-11	5.32858e-09
ENSG00000260903	2.69575	2.25671	3.93962e-11	5.43577e-09
ENSG00000162522	1.39138	6.32637	3.99309e-11	5.46748e-09
ENSG00000106789	1.80861	2.13033	4.19593e-11	5.70169e-09
ENSG00000130208	1.86211	4.47595	4.35336e-11	5.8698e-09
ENSG00000147573	2.21687	7.46	4.38508e-11	5.8698e-09
ENSG00000128016	1.70609	3.80364	4.66125e-11	6.15484e-09
ENSG00000171450	2.98938	0.412121	4.66665e-11	6.15484e-09
ENSG00000171246	2.92749	0.906336	4.87086e-11	6.37727e-09
ENSG00000125657	2.0151	5.73307	4.96017e-11	6.44714e-09
ENSG00000177494	7.62031	-0.301466	5.43029e-11	7.00742e-09
ENSG00000184731	3.47237	0.0932031	5.928e-11	7.59503e-09
ENSG00000233901	1.98162	1.67131	6.20385e-11	7.89209e-09
ENSG00000077585	1.52495	4.54382	6.51873e-11	8.19423e-09
ENSG00000164616	1.74377	2.55672	6.53273e-11	8.19423e-09
ENSG00000186897	2.16908	1.46271	7.56982e-11	9.42916e-09
ENSG00000100522	1.46952	4.5298	8.41429e-11	1.03375e-08
ENSG00000110195	1.92521	4.46613	1.06947e-10	1.29146e-08
ENSG00000257704	1.49379	3.4805	1.0728e-10	1.29146e-08
ENSG00000147676	4.01115	-0.36141	1.20321e-10	1.43154e-08
ENSG00000080819	1.52631	4.8133	1.20512e-10	1.43154e-08
ENSG00000111885	2.22845	1.88015	1.23417e-10	1.4564e-08
ENSG00000164040	1.22968	6.66452	1.34282e-10	1.57426e-08
ENSG00000111344	1.47882	3.3411	1.46912e-10	1.71115e-08
ENSG00000109466	1.60438	4.16311	1.48282e-10	1.71596e-08
ENSG00000179841	1.60733	3.93127	1.52077e-10	1.74859e-08
ENSG00000185112	1.83033	2.83553	1.69197e-10	1.93304e-08
ENSG00000087085	3.54113	0.59685	1.7128e-10	1.94446e-08
ENSG00000126803	1.36758	6.64451	2.4482e-10	2.76185e-08
ENSG00000081059	1.95827	3.59671	2.48401e-10	2.78473e-08
ENSG00000180613	3.53022	-0.0967308	2.72462e-10	3.0355e-08
ENSG00000105376	2.2194	2.41558	2.74689e-10	3.04141e-08
ENSG00000155760	1.99094	4.05688	2.77119e-10	3.0495e-08
ENSG00000172752	4.42772	-0.415119	2.97347e-10	3.25214e-08
ENSG00000130222	2.95442	1.00621	3.26551e-10	3.53706e-08
ENSG00000170577	3.94272	0.0461127	3.27341e-10	3.53706e-08
ENSG00000260604	4.6299	0.818634	3.51503e-10	3.7754e-08
ENSG00000181634	3.71322	2.28879	3.87341e-10	4.13556e-08
ENSG00000182771	2.20316	1.87829	4.02172e-10	4.26849e-08
ENSG00000130720	2.6342	0.898498	4.10335e-10	4.32951e-08
ENSG00000167244	1.87475	8.80012	4.27191e-10	4.48101e-08
ENSG00000156017	1.86432	4.30685	4.97053e-10	5.18351e-08
ENSG00000102854	2.25566	1.22507	5.03543e-10	5.22084e-08
ENSG00000261040	2.05973	4.2375	5.28307e-10	5.41476e-08
ENSG00000127129	6.52787	0.396017	5.29999e-10	5.41476e-08
ENSG00000183508	3.21021	0.971947	5.31303e-10	5.41476e-08
ENSG00000182389	3.51821	-0.00750663	5.39659e-10	5.46885e-08
ENSG00000130881	2.12802	2.87366	5.61022e-10	5.63289e-08
ENSG00000129422	2.18905	3.65366	5.75922e-10	5.73906e-08
ENSG00000099812	2.75675	4.27412	5.79772e-10	5.74551e-08
ENSG00000121797	2.44281	0.627631	6.04433e-10	5.95698e-08
ENSG00000162813	1.23918	6.24604	6.31627e-10	6.19098e-08
ENSG00000163624	2.15636	1.61268	6.75477e-10	6.5848e-08
ENSG00000183049	3.05496	0.992114	7.12847e-10	6.91153e-08
ENSG00000224520	2.04305	5.40318	7.57238e-10	7.30246e-08
ENSG00000106624	2.26959	5.83791	7.63699e-10	7.32538e-08
ENSG00000107518	3.00071	1.36336	8.16994e-10	7.7949e-08
ENSG00000113595	1.37164	3.91484	8.40018e-10	7.97217e-08
ENSG00000167767	1.98499	6.09157	8.56137e-10	8.08238e-08
ENSG00000129757	2.0917	3.23273	8.69947e-10	8.1272e-08
ENSG00000146242	1.89992	5.18961	9.13233e-10	8.48739e-08
ENSG00000131981	1.88991	4.67273	9.33201e-10	8.5679e-08
ENSG00000152137	1.55091	4.8915	9.36226e-10	8.5679e-08
ENSG00000168528	2.21904	3.33922	9.60395e-10	8.74447e-08
ENSG00000067840	2.18113	3.31987	9.95497e-10	8.98371e-08
ENSG00000213626	3.61046	0.26767	9.99787e-10	8.98371e-08
ENSG00000101210	1.6055	6.84268	1.0017e-09	8.98371e-08
ENSG00000105246	2.04743	2.89801	1.01963e-09	9.09907e-08
ENSG00000116544	2.57454	2.25514	1.03547e-09	9.14933e-08
ENSG00000076826	1.52822	4.14179	1.07845e-09	9.48239e-08
ENSG00000172115	1.3333	7.22615	1.1381e-09	9.9581e-08
ENSG00000116254	2.05503	3.7983	1.15088e-09	9.97263e-08
ENSG00000198087	1.44133	6.61023	1.20698e-09	1.04085e-07
ENSG00000136999	3.58998	2.18832	1.27656e-09	1.09558e-07
ENSG00000122176	2.12535	1.25489	1.34009e-09	1.14462e-07
ENSG00000170500	2.23064	2.44128	1.36294e-09	1.15272e-07
ENSG00000139269	1.91679	2.87049	1.36325e-09	1.15272e-07
ENSG00000163581	2.1495	3.64556	1.36884e-09	1.15272e-07
ENSG00000233817	3.68753	0.749103	1.40736e-09	1.17962e-07
ENSG00000090530	1.27278	7.54455	1.42042e-09	1.18503e-07
ENSG00000120738	2.33113	4.23102	1.4376e-09	1.19381e-07
ENSG00000164690	3.10842	1.4107	1.52256e-09	1.25853e-07
ENSG00000160145	1.51094	3.63158	1.69371e-09	1.39358e-07
ENSG00000152779	4.18227	2.99328	1.84535e-09	1.507e-07
ENSG00000204525	2.45125	3.2993	1.84835e-09	1.507e-07
ENSG00000187244	1.6697	7.16536	1.94437e-09	1.5781e-07
ENSG00000197971	1.95755	3.15791	1.99789e-09	1.61424e-07
ENSG00000162366	1.69289	4.7199	2.0348e-09	1.63669e-07
ENSG00000122787	3.30743	0.524837	2.09847e-09	1.68036e-07
ENSG00000185885	2.6096	2.23714	2.13249e-09	1.70002e-07
ENSG00000188112	2.60939	0.45966	2.21099e-09	1.7548e-07
ENSG00000179674	2.77215	0.61369	2.23324e-09	1.76465e-07
ENSG00000141526	2.85764	4.89955	2.40959e-09	1.89565e-07
ENSG00000008735	2.8667	2.40483	2.73384e-09	2.14135e-07
ENSG00000102996	1.63879	4.00806	2.90605e-09	2.26634e-07
ENSG00000177335	2.5125	1.19384	3.17075e-09	2.44715e-07
ENSG00000124839	2.03104	2.61564	3.1769e-09	2.44715e-07
ENSG00000167900	1.12187	8.45022	3.17882e-09	2.44715e-07
ENSG00000197249	2.74877	0.758083	3.20398e-09	2.45597e-07
ENSG00000205744	2.26734	2.27584	3.26116e-09	2.48916e-07
ENSG00000131398	1.63597	4.84926	3.40037e-09	2.58442e-07
ENSG00000006016	2.68826	2.99409	3.4375e-09	2.60058e-07
ENSG00000159713	2.5406	1.55074	3.4514e-09	2.60058e-07
ENSG00000185101	2.50487	2.66952	3.46513e-09	2.60058e-07
ENSG00000165272	2.50272	3.37673	3.5207e-09	2.63128e-07
ENSG00000144810	2.29144	2.88446	3.58065e-09	2.66499e-07
ENSG00000085563	3.16261	1.45163	4.23627e-09	3.13992e-07
ENSG00000146267	1.45985	3.21788	4.62417e-09	3.41332e-07
ENSG00000177425	1.48691	5.44567	4.77488e-09	3.51013e-07
ENSG00000188483	1.43038	3.27504	4.88428e-09	3.57589e-07
ENSG00000169067	4.35536	-0.596823	4.98593e-09	3.63547e-07
ENSG00000168243	1.51405	4.00049	5.41532e-09	3.91672e-07
ENSG00000148600	2.54913	1.64844	5.47974e-09	3.94739e-07
ENSG00000170421	1.93904	8.72166	5.55078e-09	3.98258e-07
ENSG00000124216	1.93066	4.53179	5.72495e-09	4.06894e-07
ENSG00000254285	1.93128	8.04273	5.73478e-09	4.06894e-07
ENSG00000130762	1.21289	4.52865	5.73921e-09	4.06894e-07
ENSG00000145911	1.7561	1.63736	5.76694e-09	4.07251e-07
ENSG00000129521	1.33184	4.21482	6.10971e-09	4.29764e-07
ENSG00000137673	2.54664	0.779455	6.30179e-09	4.39881e-07
ENSG00000180720	2.97798	0.517156	6.30636e-09	4.39881e-07
ENSG00000164181	1.44539	4.59095	6.32711e-09	4.39881e-07
ENSG00000126264	2.63623	-0.0105953	6.39534e-09	4.42908e-07
ENSG00000213853	1.63429	3.7899	6.5405e-09	4.4949e-07
ENSG00000154035	1.90158	4.24126	6.66035e-09	4.55902e-07
ENSG00000153814	2.33013	2.40429	6.72793e-09	4.55902e-07
ENSG00000116741	2.39913	3.32845	6.74477e-09	4.55902e-07
ENSG00000272520	1.5777	3.63676	6.75908e-09	4.55902e-07
ENSG00000007062	1.39206	3.72634	6.76594e-09	4.55902e-07
ENSG00000141753	3.22455	4.87913	6.7863e-09	4.55902e-07
ENSG00000135480	2.31511	2.93516	6.8549e-09	4.58792e-07
ENSG00000111331	1.81936	5.71284	6.89688e-09	4.59886e-07
ENSG00000146232	1.2424	4.60714	6.93606e-09	4.60786e-07
ENSG00000165474	3.0846	-0.177631	7.25605e-09	4.80265e-07
ENSG00000173391	2.79987	2.73308	7.41102e-09	4.88718e-07
ENSG00000124249	2.55768	-0.0192346	7.70365e-09	5.06045e-07
ENSG00000174460	4.20041	-0.284884	7.73018e-09	5.06045e-07
ENSG00000198915	3.31803	0.761205	7.91056e-09	5.1597e-07
ENSG00000213190	1.42849	5.08582	8.84831e-09	5.75044e-07
ENSG00000105464	1.79506	3.1074	9.36149e-09	6.06199e-07
ENSG00000142619	2.92412	1.50083	9.53958e-09	6.15509e-07
ENSG00000140545	1.29781	8.64775	9.91609e-09	6.37509e-07
ENSG00000040608	1.56707	3.8383	9.96681e-09	6.38481e-07
ENSG00000161642	1.50137	4.2669	1.08786e-08	6.94408e-07
ENSG00000112655	1.73095	5.42447	1.11649e-08	7.07977e-07
ENSG00000108861	1.25094	7.56927	1.11701e-08	7.07977e-07
ENSG00000086967	4.18357	-0.210023	1.12756e-08	7.12148e-07
ENSG00000173227	2.49198	3.43245	1.14032e-08	7.16493e-07
ENSG00000075618	1.09217	7.32913	1.14243e-08	7.16493e-07
ENSG00000158887	3.15766	0.762225	1.17471e-08	7.34172e-07
ENSG00000107611	2.38329	-0.19939	1.19901e-08	7.45893e-07
ENSG00000106538	2.29797	1.69558	1.20178e-08	7.45893e-07
ENSG00000213155	2.17614	1.32045	1.21336e-08	7.50482e-07
ENSG00000169241	1.6775	5.67885	1.21901e-08	7.51391e-07
ENSG00000134917	3.39762	0.889047	1.29126e-08	7.93195e-07
ENSG00000153294	5.59098	0.759307	1.31585e-08	8.05543e-07
ENSG00000262823	3.16463	0.841661	1.34025e-08	8.17686e-07
ENSG00000105855	2.14013	4.37246	1.36369e-08	8.29168e-07
ENSG00000074370	2.05061	1.98546	1.41047e-08	8.54715e-07
ENSG00000115844	1.82176	3.63286	1.52502e-08	9.21017e-07
ENSG00000131094	1.98102	3.26525	1.54877e-08	9.29794e-07
ENSG00000058085	1.74886	4.03241	1.60101e-08	9.54124e-07
ENSG00000253190	4.38547	0.240918	1.60111e-08	9.54124e-07
ENSG00000088280	1.7833	1.83416	1.65837e-08	9.8274e-07
ENSG00000142089	1.19866	7.83687	1.66009e-08	9.8274e-07
ENSG00000186854	2.38051	0.0718274	1.7885e-08	1.05527e-06
ENSG00000143248	1.84576	7.48934	1.79816e-08	1.05749e-06
ENSG00000234745	2.75898	0.397585	1.89229e-08	1.10922e-06
ENSG00000133101	2.87664	0.490702	1.92929e-08	1.12722e-06
ENSG00000155329	1.4935	4.05471	1.97834e-08	1.14938e-06
ENSG00000117707	2.40375	1.14166	1.98003e-08	1.14938e-06
ENSG00000197261	2.81847	0.49573	2.00164e-08	1.15818e-06
ENSG00000204257	1.57776	1.47768	2.04315e-08	1.17839e-06
ENSG00000253141	2.01427	0.699468	2.07924e-08	1.19536e-06
ENSG00000143341	2.8494	3.46026	2.10357e-08	1.20549e-06
ENSG00000136052	1.3515	3.41321	2.20683e-08	1.26064e-06
ENSG00000128045	3.51521	2.47664	2.24718e-08	1.27961e-06
ENSG00000164825	1.68054	2.89112	2.39883e-08	1.36164e-06
ENSG00000076706	1.38651	6.77833	2.40851e-08	1.36282e-06
ENSG00000115457	1.90241	1.78383	2.48258e-08	1.40032e-06
ENSG00000115590	3.62394	3.24318	2.57615e-08	1.44854e-06
ENSG00000124508	1.16774	4.58654	2.5939e-08	1.45396e-06
ENSG00000167772	1.9597	5.1363	2.60352e-08	1.45481e-06
ENSG00000164976	2.20857	3.65192	2.69304e-08	1.49551e-06
ENSG00000188763	2.25352	0.790686	2.76469e-08	1.53056e-06
ENSG00000118432	1.97625	0.781461	2.88038e-08	1.5897e-06
ENSG00000227051	2.0002	1.89075	3.1598e-08	1.73347e-06
ENSG00000225356	2.07583	4.54677	3.16019e-08	1.73347e-06
ENSG00000177469	1.44805	6.9139	3.28555e-08	1.79412e-06
ENSG00000170381	2.02201	2.93514	3.29077e-08	1.79412e-06
ENSG00000133636	2.00282	1.51024	3.55865e-08	1.92723e-06
ENSG00000121743	2.98754	-0.356485	3.56026e-08	1.92723e-06
ENSG00000231203	1.96983	3.7033	3.56715e-08	1.92723e-06
ENSG00000117791	1.79797	2.51865	3.6087e-08	1.94382e-06
ENSG00000111319	2.84368	1.89413	3.62489e-08	1.9467e-06
ENSG00000237515	2.72572	4.96795	3.6515e-08	1.95513e-06
ENSG00000072682	1.72783	5.34044	3.66627e-08	1.9572e-06
ENSG00000230882	2.2358	3.71833	3.81366e-08	2.02984e-06
ENSG00000213694	4.59199	0.145422	3.96764e-08	2.10555e-06
ENSG00000172986	1.55703	2.17435	4.48981e-08	2.37563e-06
ENSG00000118194	3.19962	0.708981	4.5268e-08	2.38815e-06
ENSG00000130513	2.08659	8.28624	4.66334e-08	2.45297e-06
ENSG00000179913	1.52833	3.83094	4.68391e-08	2.45659e-06
ENSG00000104537	2.37377	0.155827	4.72092e-08	2.46192e-06
ENSG00000140853	1.56235	1.64772	4.72152e-08	2.46192e-06
ENSG00000250539	1.83315	4.62417	5.34899e-08	2.77761e-06
ENSG00000162437	1.4441	3.67798	5.35793e-08	2.77761e-06
ENSG00000006283	2.73865	0.960295	5.43061e-08	2.80717e-06
ENSG00000181773	1.43939	3.5056	5.49478e-08	2.83218e-06
ENSG00000111816	1.5441	3.8541	5.88756e-08	3.02594e-06
ENSG00000180155	2.29407	2.83465	5.92126e-08	3.03456e-06
ENSG00000119888	1.94525	6.07713	6.01741e-08	3.07505e-06
ENSG00000142910	1.94729	6.82113	6.11261e-08	3.11483e-06
ENSG00000125731	2.35558	2.47463	6.25466e-08	3.17818e-06
ENSG00000143819	1.3064	6.91534	6.49043e-08	3.28142e-06
ENSG00000124564	1.80042	3.70339	6.53346e-08	3.29188e-06
ENSG00000123610	2.94766	-0.128764	6.57355e-08	3.29814e-06
ENSG00000253968	1.73476	1.27111	6.61185e-08	3.30353e-06
ENSG00000135744	3.02878	2.76171	7.46606e-08	3.69941e-06
ENSG00000188512	1.18014	5.14409	7.53915e-08	3.72534e-06
ENSG00000117906	1.28008	6.044	7.91247e-08	3.89906e-06
ENSG00000229023	1.03901	5.01953	8.11018e-08	3.98554e-06
ENSG00000254004	1.24155	4.64771	8.16629e-08	4.00215e-06
ENSG00000130176	3.10834	0.524095	8.21105e-08	4.01312e-06
ENSG00000172738	2.56147	0.293833	8.39754e-08	4.08516e-06
ENSG00000255198	1.52977	3.18161	8.41139e-08	4.08516e-06
ENSG00000182759	2.75417	0.997285	8.63357e-08	4.17413e-06
ENSG00000213023	1.96069	2.19794	8.9015e-08	4.2921e-06
ENSG00000147257	3.32123	-0.198688	8.9628e-08	4.31007e-06
ENSG00000226973	2.36463	2.34806	9.15251e-08	4.38953e-06
ENSG00000124762	1.75554	6.80506	9.18928e-08	4.39542e-06
ENSG00000073803	1.16721	4.22066	9.23498e-08	4.40553e-06
ENSG00000204385	2.91903	2.38275	9.30128e-08	4.42539e-06
ENSG00000269397	2.38228	-0.243039	9.41451e-08	4.45368e-06
ENSG00000185499	1.24257	4.05395	9.41766e-08	4.45368e-06
ENSG00000122861	1.98326	8.37399	9.49456e-08	4.46992e-06
ENSG00000254534	1.70749	3.36143	9.70031e-08	4.55483e-06
ENSG00000231655	2.24961	0.360733	9.74977e-08	4.5661e-06
ENSG00000138678	1.05617	6.00119	9.9965e-08	4.66946e-06
ENSG00000154330	3.13761	3.13055	1.01365e-07	4.72254e-06
ENSG00000177138	2.00489	0.607073	1.03644e-07	4.81621e-06
ENSG00000149633	3.90704	-0.453031	1.05594e-07	4.89414e-06
ENSG00000173846	1.39221	3.29375	1.06586e-07	4.92741e-06
ENSG00000092096	1.62757	3.81148	1.0854e-07	5.00483e-06
ENSG00000107485	1.61455	1.68936	1.08947e-07	5.00706e-06
ENSG00000166173	1.32854	4.43279	1.09146e-07	5.00706e-06
ENSG00000188761	3.14386	0.358847	1.11131e-07	5.08034e-06
ENSG00000150551	1.88861	4.65206	1.1131e-07	5.08034e-06
ENSG00000106258	1.73601	2.41447	1.12068e-07	5.10192e-06
ENSG00000227038	2.02084	2.11245	1.15428e-07	5.24159e-06
ENSG00000178226	2.65831	-0.417859	1.15744e-07	5.24268e-06
ENSG00000174032	1.41663	5.71406	1.1692e-07	5.28259e-06
ENSG00000226405	1.30134	3.23837	1.1758e-07	5.29907e-06
ENSG00000095752	4.90372	5.07382	1.18017e-07	5.30544e-06
ENSG00000184347	1.95619	4.83	1.18934e-07	5.33329e-06
ENSG00000174640	3.79248	2.81397	1.20961e-07	5.41066e-06
ENSG00000136960	1.41901	2.6761	1.23865e-07	5.52679e-06
ENSG00000227954	1.96844	1.65082	1.24714e-07	5.55085e-06
ENSG00000261559	1.04215	5.5934	1.27285e-07	5.65124e-06
ENSG00000243836	2.6566	0.324204	1.27819e-07	5.66095e-06
ENSG00000183688	1.32567	5.69447	1.2897e-07	5.69788e-06
ENSG00000214049	1.70121	1.49909	1.3045e-07	5.7491e-06
ENSG00000110446	4.3015	0.0640623	1.31746e-07	5.79197e-06
ENSG00000232110	1.48062	1.94877	1.3215e-07	5.79553e-06
ENSG00000163499	1.9355	0.624616	1.32621e-07	5.80199e-06
ENSG00000230943	2.91304	-0.689892	1.3597e-07	5.91966e-06
ENSG00000175920	4.09941	-0.0723533	1.44403e-07	6.23241e-06
ENSG00000173269	2.14799	0.340684	1.44525e-07	6.23241e-06
ENSG00000235750	2.73204	0.267374	1.44544e-07	6.23241e-06
ENSG00000133069	2.08372	2.38976	1.45647e-07	6.26493e-06
ENSG00000134545	4.33989	1.0425	1.48356e-07	6.36616e-06
ENSG00000101213	2.38852	0.763424	1.51345e-07	6.47895e-06
ENSG00000137819	1.27915	3.71134	1.52183e-07	6.49931e-06
ENSG00000158525	2.60668	-0.0704709	1.57705e-07	6.71913e-06
ENSG00000214810	1.1205	4.87465	1.59416e-07	6.77592e-06
ENSG00000135378	3.32998	-0.304252	1.61053e-07	6.82934e-06
ENSG00000188937	1.86111	0.484073	1.62314e-07	6.86657e-06
ENSG00000121075	4.63992	-0.103997	1.638e-07	6.91315e-06
ENSG00000175183	1.45005	3.86377	1.6611e-07	6.99416e-06
ENSG00000163083	2.65144	4.72129	1.66565e-07	6.99689e-06
ENSG00000072954	1.46529	2.2281	1.67501e-07	7.01979e-06
ENSG00000137825	1.8336	1.94821	1.68245e-07	7.03073e-06
ENSG00000100055	3.86029	0.941619	1.68546e-07	7.03073e-06
ENSG00000163359	3.04635	3.5657	1.77338e-07	7.3803e-06
ENSG00000217889	1.33629	4.22079	1.77819e-07	7.3832e-06
ENSG00000128268	1.71014	3.57549	1.82187e-07	7.54707e-06
ENSG00000105290	1.58494	5.41545	1.90993e-07	7.89365e-06
ENSG00000151892	2.58709	3.28554	1.92363e-07	7.93199e-06
ENSG00000145743	1.58126	2.83444	1.98691e-07	8.17413e-06
ENSG00000163293	2.1841	1.12433	2.03138e-07	8.31891e-06
ENSG00000122694	1.72839	1.89852	2.04465e-07	8.35418e-06
ENSG00000128849	1.53725	5.37323	2.06066e-07	8.40047e-06
ENSG00000159167	2.50132	5.93589	2.10444e-07	8.54435e-06
ENSG00000065325	3.85953	0.971269	2.10879e-07	8.54435e-06
ENSG00000101670	1.5672	3.79909	2.11024e-07	8.54435e-06
ENSG00000111678	1.18576	3.68231	2.1695e-07	8.76448e-06
ENSG00000119283	3.12676	0.677922	2.19366e-07	8.84218e-06
ENSG00000164251	1.58906	7.05159	2.20694e-07	8.87578e-06
ENSG00000116990	1.86268	0.959874	2.25441e-07	9.04639e-06
ENSG00000140795	3.21115	-0.273724	2.26131e-07	9.05382e-06
ENSG00000227039	2.57662	2.10478	2.31689e-07	9.22642e-06
ENSG00000145391	1.99998	6.31643	2.31789e-07	9.22642e-06
ENSG00000230812	4.14514	-0.37937	2.31985e-07	9.22642e-06
ENSG00000239332	3.01308	0.632253	2.33299e-07	9.25003e-06
ENSG00000121895	1.92461	3.54304	2.3361e-07	9.25003e-06
ENSG00000197852	2.25417	2.21509	2.36753e-07	9.35383e-06
ENSG00000180855	1.19069	3.20972	2.38166e-07	9.38003e-06
ENSG00000091129	2.66423	3.13802	2.38462e-07	9.38003e-06
ENSG00000180801	1.47416	4.57866	2.48773e-07	9.75452e-06
ENSG00000135272	1.35848	5.00708	2.4907e-07	9.75452e-06
ENSG00000237976	2.01753	0.482515	2.63441e-07	1.02725e-05
ENSG00000130203	2.14213	6.34794	2.64329e-07	1.02848e-05
ENSG00000116985	1.56156	2.14156	2.66755e-07	1.03567e-05
ENSG00000237194	1.86398	1.99963	2.73096e-07	1.058e-05
ENSG00000196562	1.91879	0.962399	2.75172e-07	1.06217e-05
ENSG00000136275	3.15896	1.32156	2.75357e-07	1.06217e-05
ENSG00000142677	3.26348	0.642949	2.76312e-07	1.06356e-05
ENSG00000117115	2.05812	0.243842	2.77206e-07	1.06472e-05
ENSG00000165323	3.42732	1.30617	2.83372e-07	1.08608e-05
ENSG00000197019	2.47733	4.2808	2.96725e-07	1.13483e-05
ENSG00000198624	2.99818	0.0847334	3.11161e-07	1.18409e-05
ENSG00000174574	1.58205	6.34861	3.11586e-07	1.18409e-05
ENSG00000163328	2.04484	1.16619	3.14134e-07	1.19125e-05
ENSG00000187726	2.67509	0.193193	3.16476e-07	1.1976e-05
ENSG00000187955	1.8851	6.98721	3.19585e-07	1.20682e-05
ENSG00000166448	3.55376	-0.0421794	3.29614e-07	1.24062e-05
ENSG00000183779	1.48298	4.14316	3.29919e-07	1.24062e-05
ENSG00000157111	1.87333	1.52732	3.32125e-07	1.2463e-05
ENSG00000143320	2.28036	5.82896	3.4405e-07	1.28567e-05
ENSG00000167034	3.1981	-0.24145	3.46769e-07	1.29282e-05
ENSG00000132744	3.22448	-0.0729583	3.47403e-07	1.29282e-05
ENSG00000204876	1.51184	2.58817	3.48381e-07	1.29344e-05
ENSG00000163291	1.30335	5.65444	3.49013e-07	1.29344e-05
ENSG00000240065	2.30794	1.88438	3.53001e-07	1.30284e-05
ENSG00000137267	1.38843	6.21955	3.60429e-07	1.32752e-05
ENSG00000120756	1.54192	5.71759	3.69921e-07	1.35733e-05
ENSG00000225950	2.65071	0.368784	3.70036e-07	1.35733e-05
ENSG00000136250	3.46319	-0.21439	3.72166e-07	1.36056e-05
ENSG00000080561	1.40528	1.88969	3.72435e-07	1.36056e-05
ENSG00000122863	1.18108	5.48467	3.75337e-07	1.36838e-05
ENSG00000185269	2.42199	0.880867	3.95389e-07	1.43856e-05
ENSG00000092929	1.31528	5.64765	3.97987e-07	1.44508e-05
ENSG00000104140	2.00558	0.289757	4.15344e-07	1.50506e-05
ENSG00000106541	2.38239	3.61502	4.23572e-07	1.53071e-05
ENSG00000196843	1.53458	2.76957	4.24131e-07	1.53071e-05
ENSG00000176170	2.67825	3.44843	4.27052e-07	1.53816e-05
ENSG00000113916	1.10141	4.87048	4.29205e-07	1.54282e-05
ENSG00000123892	1.46281	5.12197	4.46449e-07	1.60159e-05
ENSG00000112812	1.30644	3.16786	4.47926e-07	1.60368e-05
ENSG00000226087	5.18729	-0.831615	4.49968e-07	1.60778e-05
ENSG00000162783	1.828	3.7683	4.58218e-07	1.63401e-05
ENSG00000230825	1.8293	0.459054	4.60585e-07	1.63919e-05
ENSG00000146386	1.08519	4.749	4.65357e-07	1.6495e-05
ENSG00000223722	1.17386	6.3154	4.66179e-07	1.6495e-05
ENSG00000236366	3.86722	0.219342	4.71991e-07	1.66328e-05
ENSG00000006047	1.85223	5.05737	4.83204e-07	1.69613e-05
ENSG00000213078	1.15829	4.06976	4.97431e-07	1.74266e-05
ENSG00000078804	3.05286	5.79735	4.99508e-07	1.74652e-05
ENSG00000126259	1.67572	1.74417	5.02334e-07	1.75299e-05
ENSG00000170801	2.5992	1.6923	5.38307e-07	1.87488e-05
ENSG00000146054	1.84396	3.26045	5.42874e-07	1.88712e-05
ENSG00000141854	1.70636	1.74849	5.45098e-07	1.88827e-05
ENSG00000107738	2.16672	2.30753	5.51645e-07	1.90652e-05
ENSG00000197903	1.30919	4.47572	5.5578e-07	1.91344e-05
ENSG00000162745	2.98245	2.29091	5.70795e-07	1.96134e-05
ENSG00000261787	1.43857	2.87708	5.7188e-07	1.96134e-05
ENSG00000165434	2.19185	4.77359	5.90898e-07	2.0227e-05
ENSG00000165795	1.20857	4.34078	5.92047e-07	2.02277e-05
ENSG00000119986	1.21183	2.44107	6.03566e-07	2.0543e-05
ENSG00000108691	2.46998	1.5313	6.14391e-07	2.08324e-05
ENSG00000119862	1.29016	3.74288	6.31006e-07	2.13554e-05
ENSG00000214145	2.70024	0.0829038	6.3429e-07	2.14261e-05
ENSG00000116962	1.4128	7.24172	6.50629e-07	2.19367e-05
ENSG00000121858	1.59229	4.15019	6.52854e-07	2.19424e-05
ENSG00000087494	1.83788	1.35656	6.53243e-07	2.19424e-05
ENSG00000101331	2.90282	2.17153	6.5498e-07	2.19596e-05
ENSG00000173930	1.63652	3.14235	6.57674e-07	2.20088e-05
ENSG00000165376	2.11116	8.0708	6.6769e-07	2.23024e-05
ENSG00000206503	1.01632	6.17818	6.7207e-07	2.24069e-05
ENSG00000166523	1.73102	2.55307	6.76324e-07	2.25069e-05
ENSG00000023171	3.65336	0.351413	6.81585e-07	2.264e-05
ENSG00000006611	1.65956	3.71652	6.98029e-07	2.31288e-05
ENSG00000134247	1.66088	5.57328	6.98881e-07	2.31288e-05
ENSG00000261512	1.11089	3.05486	7.00983e-07	2.31338e-05
ENSG00000169435	2.57074	2.33106	7.01609e-07	2.31338e-05
ENSG00000230191	1.12605	4.12032	7.06299e-07	2.32457e-05
ENSG00000177459	3.61792	0.266478	7.088e-07	2.32853e-05
ENSG00000227295	1.80102	2.35449	7.30048e-07	2.39395e-05
ENSG00000213943	1.36406	4.02585	7.38005e-07	2.41562e-05
ENSG00000146250	3.1616	0.048837	7.40986e-07	2.41781e-05
ENSG00000101400	1.34064	2.7221	7.41369e-07	2.41781e-05
ENSG00000162873	2.93474	0.918829	7.65829e-07	2.49305e-05
ENSG00000171608	1.29119	3.69775	7.69859e-07	2.50162e-05
ENSG00000146858	1.319	3.28651	7.79948e-07	2.52982e-05
ENSG00000135953	1.06961	5.21621	7.88077e-07	2.55158e-05
ENSG00000143590	1.9057	0.349671	8.0255e-07	2.59376e-05
ENSG00000130294	2.98704	1.35007	8.06627e-07	2.60224e-05
ENSG00000145217	1.68114	1.88854	8.09186e-07	2.60581e-05
ENSG00000185386	1.10214	4.20541	8.15505e-07	2.62145e-05
ENSG00000018408	1.25908	7.06003	8.21284e-07	2.63531e-05
ENSG00000185436	1.49336	3.05331	8.47219e-07	2.71367e-05
ENSG00000116133	1.15338	8.92815	8.51902e-07	2.72381e-05
ENSG00000133789	1.08828	5.94866	8.69949e-07	2.77163e-05
ENSG00000001461	1.56675	4.5055	8.75098e-07	2.78309e-05
ENSG00000169814	1.02214	4.75613	8.84988e-07	2.80464e-05
ENSG00000031691	1.38123	4.2421	8.85617e-07	2.80464e-05
ENSG00000085831	1.44395	4.79179	8.86565e-07	2.80464e-05
ENSG00000225335	2.39681	0.169828	8.98781e-07	2.83828e-05
ENSG00000019505	1.75364	6.03727	9.1743e-07	2.89208e-05
ENSG00000219607	2.63693	2.21317	9.5724e-07	3.01228e-05
ENSG00000205809	3.28223	0.53297	9.80691e-07	3.08068e-05
ENSG00000112378	1.48154	8.49489	9.8738e-07	3.09627e-05
ENSG00000158825	2.33134	0.108207	1.02293e-06	3.19655e-05
ENSG00000123388	1.8994	0.430099	1.03166e-06	3.21824e-05
ENSG00000104951	2.58657	3.64661	1.03402e-06	3.22e-05
ENSG00000213030	4.9096	-0.325323	1.05452e-06	3.27815e-05
ENSG00000161544	2.54263	-0.0754621	1.06155e-06	3.29428e-05
ENSG00000172954	1.46994	3.78901	1.10334e-06	3.41807e-05
ENSG00000176884	2.77246	0.452124	1.11269e-06	3.44109e-05
ENSG00000149084	1.12105	5.49539	1.13298e-06	3.49181e-05
ENSG00000157303	2.85575	0.686996	1.13771e-06	3.50037e-05
ENSG00000157870	1.28684	4.83072	1.14539e-06	3.51797e-05
ENSG00000124134	2.19842	-0.08591	1.14751e-06	3.51843e-05
ENSG00000167157	2.80139	1.66191	1.17067e-06	3.58331e-05
ENSG00000125637	1.5851	4.77339	1.1898e-06	3.63569e-05
ENSG00000100593	2.861	0.162496	1.22655e-06	3.73892e-05
ENSG00000117602	1.32882	2.49414	1.22776e-06	3.73892e-05
ENSG00000101096	2.55078	0.887504	1.24106e-06	3.77302e-05
ENSG00000163435	1.88102	5.70052	1.25011e-06	3.79413e-05
ENSG00000124145	1.71452	7.68567	1.26937e-06	3.84607e-05
ENSG00000104320	1.0794	7.40422	1.32525e-06	4.00859e-05
ENSG00000198732	2.37726	1.57014	1.33036e-06	4.0173e-05
ENSG00000099260	2.48415	1.22179	1.33343e-06	4.0198e-05
ENSG00000124693	2.64972	0.428732	1.34362e-06	4.04371e-05
ENSG00000188338	2.27599	0.365668	1.35276e-06	4.0572e-05
ENSG00000104164	1.1006	5.40512	1.35489e-06	4.0572e-05
ENSG00000117226	2.43176	3.65394	1.40213e-06	4.19165e-05
ENSG00000072195	1.54902	3.53771	1.44653e-06	4.31005e-05
ENSG00000137440	4.75362	0.0808194	1.45027e-06	4.31403e-05
ENSG00000214207	1.46368	6.73317	1.45754e-06	4.32846e-05
ENSG00000198488	4.32613	0.212029	1.47099e-06	4.35294e-05
ENSG00000138131	2.99271	4.20671	1.47281e-06	4.35294e-05
ENSG00000049249	1.99879	1.43541	1.47306e-06	4.35294e-05
ENSG00000128604	1.90355	2.96609	1.49048e-06	4.39716e-05
ENSG00000259374	1.80887	0.664323	1.53452e-06	4.51966e-05
ENSG00000125966	2.48835	3.30248	1.56889e-06	4.61331e-05
ENSG00000156804	2.80407	5.09463	1.60383e-06	4.70833e-05
ENSG00000181577	3.74055	0.213843	1.62236e-06	4.75493e-05
ENSG00000165905	2.60235	3.61346	1.63225e-06	4.77613e-05
ENSG00000182795	2.60247	0.249427	1.63883e-06	4.78758e-05
ENSG00000175463	1.87909	0.309312	1.65583e-06	4.82938e-05
ENSG00000162009	1.8359	1.99381	1.68579e-06	4.90878e-05
ENSG00000125848	1.83744	3.00322	1.70301e-06	4.95088e-05
ENSG00000133321	2.72807	1.9795	1.70659e-06	4.95275e-05
ENSG00000138378	1.85679	3.46919	1.70918e-06	4.95275e-05
ENSG00000166924	1.55747	1.3093	1.82976e-06	5.27661e-05
ENSG00000103528	2.15481	1.12761	1.83567e-06	5.28514e-05
ENSG00000114923	1.29837	2.79987	1.84275e-06	5.28877e-05
ENSG00000189052	4.48113	0.224606	1.84283e-06	5.28877e-05
ENSG00000117335	1.32559	7.84231	1.86729e-06	5.3504e-05
ENSG00000169139	1.06144	4.31236	1.90139e-06	5.43076e-05
ENSG00000157224	1.45017	5.55046	1.90616e-06	5.43573e-05
ENSG00000074695	1.08047	6.55523	1.97487e-06	5.62274e-05
ENSG00000165997	1.64451	5.66074	2.00196e-06	5.68183e-05
ENSG00000251432	1.18117	2.9371	2.05004e-06	5.79084e-05
ENSG00000196466	1.03874	2.78123	2.05006e-06	5.79084e-05
ENSG00000103723	3.22205	0.929011	2.05489e-06	5.79539e-05
ENSG00000162772	1.37088	4.90351	2.06453e-06	5.81342e-05
ENSG00000047365	1.81127	1.56585	2.10176e-06	5.90897e-05
ENSG00000105711	1.73306	2.06043	2.12002e-06	5.95099e-05
ENSG00000223573	3.04867	2.5031	2.15655e-06	6.04408e-05
ENSG00000171051	1.67438	1.80553	2.20005e-06	6.15636e-05
ENSG00000113763	1.87997	1.60015	2.21622e-06	6.19196e-05
ENSG00000180861	2.49026	0.989929	2.24014e-06	6.24567e-05
ENSG00000189067	1.31321	7.61098	2.24241e-06	6.24567e-05
ENSG00000101000	1.00335	4.52135	2.27247e-06	6.31959e-05
ENSG00000185640	3.18723	0.363057	2.28638e-06	6.34842e-05
ENSG00000107281	1.16406	4.76872	2.35295e-06	6.51309e-05
ENSG00000165443	2.34632	3.91838	2.36335e-06	6.5164e-05
ENSG00000100253	1.42063	3.31555	2.36504e-06	6.5164e-05
ENSG00000242574	3.3218	5.64109	2.37493e-06	6.53361e-05
ENSG00000130813	2.21503	0.171114	2.38278e-06	6.54516e-05
ENSG00000095932	2.62007	2.51974	2.44337e-06	6.69327e-05
ENSG00000166033	1.405	4.3899	2.44416e-06	6.69327e-05
ENSG00000135549	1.85553	3.17077	2.4567e-06	6.71736e-05
ENSG00000197405	2.37283	1.80845	2.4679e-06	6.73059e-05
ENSG00000010319	2.15501	0.479043	2.46905e-06	6.73059e-05
ENSG00000147041	3.611	1.42038	2.50669e-06	6.82283e-05
ENSG00000165188	8.06904	0.160585	2.51511e-06	6.83539e-05
ENSG00000161249	1.31229	5.11031	2.56512e-06	6.96076e-05
ENSG00000140678	1.71471	4.00488	2.60322e-06	7.04283e-05
ENSG00000085063	1.00118	8.11981	2.62397e-06	7.08828e-05
ENSG00000008086	1.47451	1.59042	2.75706e-06	7.42156e-05
ENSG00000189143	2.87715	5.05263	2.76236e-06	7.42156e-05
ENSG00000111700	1.24312	2.02833	2.7639e-06	7.42156e-05
ENSG00000261524	1.64366	1.97255	2.77389e-06	7.43727e-05
ENSG00000121753	1.66908	3.49814	2.7975e-06	7.48647e-05
ENSG00000104205	1.51353	3.49736	2.80059e-06	7.48647e-05
ENSG00000150687	1.26057	7.23412	2.83031e-06	7.54809e-05
ENSG00000162040	2.15962	1.20772	2.83206e-06	7.54809e-05
ENSG00000111057	1.23825	6.24247	3.00696e-06	7.99048e-05
ENSG00000215089	1.32998	6.7265	3.0327e-06	8.03509e-05
ENSG00000111711	1.05391	5.31803	3.04159e-06	8.04675e-05
ENSG00000170502	1.14686	6.44829	3.13654e-06	8.27354e-05
ENSG00000167815	1.02658	6.02023	3.18279e-06	8.38322e-05
ENSG00000187642	1.52948	0.750039	3.28162e-06	8.59791e-05
ENSG00000135776	1.47668	3.5124	3.28348e-06	8.59791e-05
ENSG00000133805	2.36577	-0.051971	3.29548e-06	8.61676e-05
ENSG00000104998	1.14853	3.89687	3.4244e-06	8.94083e-05
ENSG00000182492	1.2656	7.43062	3.55342e-06	9.25076e-05
ENSG00000133083	1.63932	4.39151	3.63668e-06	9.41286e-05
ENSG00000204580	1.38703	6.1706	3.6996e-06	9.56192e-05
ENSG00000057294	2.14282	2.34573	3.82755e-06	9.85005e-05
ENSG00000104833	1.17825	5.64219	3.96493e-06	0.000101744
ENSG00000100167	2.47554	1.90394	3.98125e-06	0.000101988
ENSG00000170962	1.75596	3.16263	3.9858e-06	0.000101988
ENSG00000270696	1.59887	2.17973	4.04511e-06	0.000103358
ENSG00000141298	1.03761	5.6077	4.11559e-06	0.000105009
ENSG00000137672	2.58931	2.9742	4.15077e-06	0.000105606
ENSG00000129682	1.6299	1.70797	4.18503e-06	0.000106327
ENSG00000156265	2.12146	1.11046	4.21664e-06	0.000106979
ENSG00000244242	1.73504	3.84794	4.23852e-06	0.000107382
ENSG00000167755	2.36456	6.03916	4.2516e-06	0.000107561
ENSG00000261005	2.17626	1.1724	4.26566e-06	0.000107765
ENSG00000140832	1.99955	0.491268	4.2835e-06	0.000108064
ENSG00000198910	2.03968	5.57654	4.31536e-06	0.000108714
ENSG00000176490	1.84828	2.83778	4.32219e-06	0.000108734
ENSG00000105929	3.70976	0.204144	4.48761e-06	0.000112579
ENSG00000163637	1.15396	2.81235	4.49876e-06	0.000112701
ENSG00000196083	1.1432	4.34931	4.55923e-06	0.000113898
ENSG00000106605	1.07072	4.48599	4.602e-06	0.000114807
ENSG00000176387	1.71738	0.966955	4.62464e-06	0.000115211
ENSG00000184500	1.15273	6.88125	4.7014e-06	0.000116799
ENSG00000228125	1.45238	3.40761	4.73346e-06	0.000117433
ENSG00000165507	2.05636	0.761657	4.78119e-06	0.000118298
ENSG00000148702	2.64854	1.75067	4.78151e-06	0.000118298
ENSG00000138744	1.27564	2.3879	4.82131e-06	0.000119118
ENSG00000102879	1.52835	1.53693	4.93133e-06	0.000121398
ENSG00000172824	1.96278	4.02032	4.93389e-06	0.000121398
ENSG00000116396	1.35047	2.43622	4.99097e-06	0.000122466
ENSG00000166831	2.59185	2.24903	5.1273e-06	0.000125469
ENSG00000258586	2.40248	2.05653	5.23038e-06	0.000127776
ENSG00000166803	1.17793	6.7717	5.23584e-06	0.000127776
ENSG00000107821	2.20109	2.45477	5.2443e-06	0.000127808
ENSG00000164626	1.36511	3.40559	5.27414e-06	0.000128361
ENSG00000239305	1.22688	3.56188	5.29031e-06	0.00012858
ENSG00000234737	1.2809	4.97144	5.29937e-06	0.000128626
ENSG00000228998	1.38224	5.91442	5.33393e-06	0.000129116
ENSG00000235142	1.38636	4.27138	5.37756e-06	0.000129821
ENSG00000183549	2.51652	1.72091	5.41328e-06	0.000130508
ENSG00000176092	1.75521	1.96432	5.50645e-06	0.000132576
ENSG00000139971	1.17063	2.55254	5.57395e-06	0.000134021
ENSG00000137573	2.59359	0.143149	5.64661e-06	0.000135587
ENSG00000099284	2.56991	1.3007	5.67163e-06	0.000136005
ENSG00000120256	1.21596	5.05456	5.7685e-06	0.000138144
ENSG00000135604	1.99128	2.6831	5.8125e-06	0.000139012
ENSG00000115252	1.486	5.18607	5.8647e-06	0.000140073
ENSG00000204592	1.39725	5.88899	5.9982e-06	0.000143071
ENSG00000214269	1.44574	5.84483	6.0166e-06	0.00014332
ENSG00000112902	3.16061	2.88554	6.18892e-06	0.000146839
ENSG00000270762	2.73672	-0.462673	6.24516e-06	0.000147978
ENSG00000247416	2.52825	1.52208	6.26123e-06	0.000148163
ENSG00000213177	1.00974	5.49633	6.27525e-06	0.000148299
ENSG00000101197	2.15493	2.90728	6.2997e-06	0.000148681
ENSG00000226674	1.69771	3.2152	6.3539e-06	0.000149763
ENSG00000114270	1.2802	7.487	6.42955e-06	0.000151348
ENSG00000100302	2.74366	0.847353	6.58058e-06	0.000154497
ENSG00000099860	2.37506	4.11199	6.6546e-06	0.000156031
ENSG00000136770	1.05794	4.23285	6.70619e-06	0.00015683
ENSG00000164300	1.19964	2.42919	6.74586e-06	0.000157553
ENSG00000250363	2.00528	0.221385	6.9407e-06	0.00016185
ENSG00000108551	2.60172	1.08346	6.9479e-06	0.00016185
ENSG00000166473	2.13061	1.99955	7.0749e-06	0.000164595
ENSG00000223414	2.41132	0.613432	7.24072e-06	0.000168016
ENSG00000213275	1.12914	2.47525	7.25823e-06	0.000168205
ENSG00000173267	1.55357	4.25291	7.29728e-06	0.000168892
ENSG00000151117	2.88336	0.704582	7.40774e-06	0.000171228
ENSG00000147003	2.19652	1.08054	7.50106e-06	0.000172809
ENSG00000099194	1.30086	7.38736	7.50504e-06	0.000172809
ENSG00000112679	1.12022	4.72131	7.6144e-06	0.000174878
ENSG00000197291	1.97117	-0.239401	7.71577e-06	0.00017673
ENSG00000254300	2.26019	2.90778	7.74359e-06	0.000176939
ENSG00000172183	1.34173	1.38324	7.83708e-06	0.000178847
ENSG00000213958	1.44672	2.32091	7.92597e-06	0.00018051
ENSG00000105427	1.69504	1.87299	7.93156e-06	0.00018051
ENSG00000125730	4.46952	2.69409	7.97295e-06	0.000181026
ENSG00000137501	1.87008	6.14773	8.09278e-06	0.000183464
ENSG00000118257	1.21233	3.63083	8.10075e-06	0.000183464
ENSG00000139278	1.49006	2.08109	8.26284e-06	0.000186663
ENSG00000173805	2.24513	2.21065	8.28218e-06	0.000186865
ENSG00000180616	2.02517	0.480838	8.34822e-06	0.000188118
ENSG00000151239	1.19945	5.79401	8.48931e-06	0.000191057
ENSG00000130517	1.08692	4.89358	8.59549e-06	0.000193205
ENSG00000121068	1.3126	3.93975	8.6689e-06	0.000194125
ENSG00000171435	1.5984	1.30874	8.71313e-06	0.000194549
ENSG00000184517	1.01668	4.36212	8.72039e-06	0.000194549
ENSG00000135747	1.24365	4.68523	8.79286e-06	0.000195922
ENSG00000101198	1.48904	5.1424	8.89832e-06	0.000198026
ENSG00000179546	3.08424	1.05252	9.07576e-06	0.000201668
ENSG00000256913	2.16641	1.59746	9.0852e-06	0.000201668
ENSG00000246877	3.07687	-0.25942	9.0957e-06	0.000201668
ENSG00000131795	1.30272	5.13661	9.12307e-06	0.000202025
ENSG00000092758	1.56025	0.992549	9.2135e-06	0.00020265
ENSG00000244503	2.5294	0.0995022	9.21909e-06	0.00020265
ENSG00000137285	1.27571	4.56886	9.28512e-06	0.000203852
ENSG00000118785	2.14874	10.6211	9.30593e-06	0.000204059
ENSG00000163710	1.20118	2.44452	9.41472e-06	0.000206193
ENSG00000229273	1.15876	2.32254	9.51669e-06	0.000208172
ENSG00000185950	1.11393	2.47696	9.67739e-06	0.000211172
ENSG00000144655	1.35341	4.30065	9.72159e-06	0.000211803
ENSG00000156463	1.09932	4.71452	9.72994e-06	0.000211803
ENSG00000259169	1.46291	2.25058	9.88646e-06	0.00021495
ENSG00000180758	1.42093	2.58693	9.92437e-06	0.000215445
ENSG00000165757	1.47157	4.6376	9.93329e-06	0.000215445
ENSG00000182557	1.90364	1.29469	9.96322e-06	0.000215573
ENSG00000080493	1.24222	5.12445	1.00518e-05	0.000217228
ENSG00000157551	1.78478	2.75423	1.0068e-05	0.000217315
ENSG00000172508	1.72723	0.276924	1.01158e-05	0.000218084
ENSG00000025039	1.27217	3.63174	1.02668e-05	0.000220547
ENSG00000236609	2.03084	1.01423	1.0352e-05	0.000222111
ENSG00000129354	1.41995	5.4501	1.0392e-05	0.000222701
ENSG00000119922	1.53506	2.12495	1.0782e-05	0.000230509
ENSG00000136048	1.24206	4.95416	1.08047e-05	0.000230574
ENSG00000198959	1.22516	8.52528	1.08143e-05	0.000230574
ENSG00000197769	1.77397	1.60459	1.08236e-05	0.000230574
ENSG00000198435	1.17197	4.67846	1.12235e-05	0.000238526
ENSG00000205403	2.9167	1.09811	1.12775e-05	0.000239391
ENSG00000187608	1.39589	4.23724	1.1321e-05	0.000239747
ENSG00000108375	1.43623	2.99658	1.14421e-05	0.000242024
ENSG00000064205	4.19812	-0.35767	1.15367e-05	0.000243531
ENSG00000234025	2.96133	0.336877	1.16415e-05	0.000245375
ENSG00000103089	2.05331	3.83845	1.16687e-05	0.000245429
ENSG00000234267	1.84419	0.404271	1.16715e-05	0.000245429
ENSG00000272449	2.51168	0.0773614	1.17791e-05	0.000247401
ENSG00000236682	1.71836	2.19356	1.18806e-05	0.000249242
ENSG00000115468	2.07392	1.31601	1.23051e-05	0.000257429
ENSG00000226549	1.31734	5.858	1.23139e-05	0.000257429
ENSG00000165685	1.53766	4.64654	1.24247e-05	0.000259131
ENSG00000175793	4.36624	2.97896	1.24386e-05	0.000259131
ENSG00000197959	2.10671	2.75026	1.25318e-05	0.000260769
ENSG00000100600	1.42371	5.16492	1.28269e-05	0.000265677
ENSG00000100505	1.35486	3.9595	1.3055e-05	0.000270089
ENSG00000250786	1.30953	3.95311	1.31176e-05	0.000271073
ENSG00000249744	1.6434	0.815386	1.31987e-05	0.000272433
ENSG00000196878	2.09025	4.09613	1.35052e-05	0.000278153
ENSG00000164620	1.13934	3.96581	1.35546e-05	0.000278698
ENSG00000175906	1.51835	4.45067	1.35643e-05	0.000278698
ENSG00000220418	1.45919	4.27528	1.37648e-05	0.000282493
ENSG00000179862	1.38424	2.46396	1.3883e-05	0.000284594
ENSG00000084731	1.00745	4.76124	1.39005e-05	0.000284627
ENSG00000225833	3.90265	-0.546062	1.40162e-05	0.000286669
ENSG00000065361	2.16903	-0.206743	1.4105e-05	0.000288157
ENSG00000240912	1.41634	1.74167	1.42117e-05	0.000290006
ENSG00000197380	2.86332	0.710268	1.45544e-05	0.000296661
ENSG00000094804	1.00339	7.09336	1.46106e-05	0.000297261
ENSG00000082781	1.32075	6.29579	1.4617e-05	0.000297261
ENSG00000151414	1.1234	5.56081	1.46459e-05	0.000297435
ENSG00000169894	2.79076	-0.593232	1.49662e-05	0.000302648
ENSG00000158828	1.73907	3.54961	1.50374e-05	0.000303746
ENSG00000272086	1.24672	1.27251	1.50804e-05	0.000304272
ENSG00000180672	1.67852	0.737302	1.52964e-05	0.000308075
ENSG00000185046	1.6853	1.86561	1.53033e-05	0.000308075
ENSG00000240006	1.92304	1.74143	1.53566e-05	0.000308802
ENSG00000235275	1.23123	3.02875	1.57679e-05	0.000316718
ENSG00000226887	1.15172	4.93649	1.62323e-05	0.00032568
ENSG00000101144	1.42868	5.80953	1.68092e-05	0.000336127
ENSG00000214756	1.18037	3.14522	1.69102e-05	0.00033777
ENSG00000154146	1.37387	4.13238	1.72783e-05	0.000344053
ENSG00000196557	1.67063	3.8586	1.72822e-05	0.000344053
ENSG00000223392	2.73711	-0.560415	1.77436e-05	0.000352455
ENSG00000183186	1.29174	2.54192	1.79141e-05	0.000354663
ENSG00000205078	1.33153	2.03246	1.80862e-05	0.000357283
ENSG00000128965	1.38904	5.04802	1.85478e-05	0.000365595
ENSG00000112149	1.32288	2.91144	1.89268e-05	0.000372247
ENSG00000163132	1.15657	3.10687	1.92173e-05	0.000377126
ENSG00000064787	1.67831	2.08712	1.92379e-05	0.000377126
ENSG00000226193	3.11289	-0.626172	1.93718e-05	0.000379336
ENSG00000224419	1.46114	1.74337	1.96644e-05	0.000383169
ENSG00000222047	1.40766	0.503296	1.96743e-05	0.000383169
ENSG00000101842	1.68792	1.53216	1.97651e-05	0.000383977
ENSG00000163545	1.27071	5.21661	1.978e-05	0.000383977
ENSG00000250312	1.21903	1.67138	2.03109e-05	0.000393855
ENSG00000267500	1.65091	0.171759	2.03829e-05	0.000394826
ENSG00000172717	1.73491	0.0864454	2.07387e-05	0.000401064
ENSG00000069020	1.86975	1.46449	2.07497e-05	0.000401064
ENSG00000115884	1.26749	6.55337	2.08805e-05	0.000403158
ENSG00000134198	2.67089	-0.342661	2.09785e-05	0.000404347
ENSG00000160808	3.32927	0.164271	2.09872e-05	0.000404347
ENSG00000197251	3.10704	0.221472	2.1144e-05	0.000406494
ENSG00000161243	1.16163	5.86702	2.13202e-05	0.000409444
ENSG00000250548	1.8861	1.13277	2.18608e-05	0.000418481
ENSG00000128342	1.50347	5.92749	2.19814e-05	0.000420342
ENSG00000007944	1.01472	4.79954	2.2227e-05	0.000423682
ENSG00000217801	1.33969	2.87406	2.2564e-05	0.00042965
ENSG00000203497	2.38188	1.52652	2.2822e-05	0.000433642
ENSG00000215807	1.22615	3.43974	2.28492e-05	0.000433699
ENSG00000100077	1.07575	1.88104	2.28957e-05	0.000434122
ENSG00000134202	1.99597	3.74416	2.32567e-05	0.000440502
ENSG00000158427	1.05282	2.5266	2.37408e-05	0.000447309
ENSG00000270145	1.42533	1.33811	2.37699e-05	0.000447387
ENSG00000123570	2.38516	0.661453	2.41976e-05	0.000454961
ENSG00000106688	1.80646	3.61035	2.44796e-05	0.000458342
ENSG00000166250	1.87054	-0.13867	2.46293e-05	0.000460662
ENSG00000214161	1.80455	0.428749	2.55999e-05	0.000478318
ENSG00000171451	1.47297	2.6852	2.58273e-05	0.000482066
ENSG00000109610	1.14609	4.24673	2.59391e-05	0.000483389
ENSG00000273443	1.49832	0.773001	2.59521e-05	0.000483389
ENSG00000143382	2.05964	1.72904	2.66725e-05	0.000494752
ENSG00000118985	1.30419	2.74227	2.68685e-05	0.000497873
ENSG00000186998	1.35152	1.79469	2.70211e-05	0.000499735
ENSG00000075043	3.50615	2.00611	2.75543e-05	0.000508479
ENSG00000240024	1.3725	4.25214	2.75861e-05	0.000508542
ENSG00000145040	2.17289	3.92556	2.7678e-05	0.000509712
ENSG00000224687	1.73863	0.511167	2.77863e-05	0.000511182
ENSG00000104332	1.46211	2.90327	2.7832e-05	0.000511498
ENSG00000260857	1.94465	-0.0629186	2.82325e-05	0.00051674
ENSG00000228666	1.36776	1.49164	2.84826e-05	0.000520256
ENSG00000137726	2.29847	1.2047	2.87256e-05	0.00052331
ENSG00000256134	1.51448	0.629424	2.90339e-05	0.000528175
ENSG00000145198	1.52803	0.850311	2.91889e-05	0.000530457
ENSG00000203721	2.82148	0.839927	3.0027e-05	0.000544584
ENSG00000139266	1.16017	4.07232	3.06382e-05	0.000554549
ENSG00000171174	1.54962	3.59467	3.0936e-05	0.000559374
ENSG00000147872	1.18016	5.97746	3.10837e-05	0.000561478
ENSG00000112343	1.00091	4.80535	3.19584e-05	0.000573776
ENSG00000091490	1.24909	5.12482	3.19884e-05	0.000573776
ENSG00000185015	1.29028	4.28108	3.20433e-05	0.000574187
ENSG00000079385	3.06219	-0.255714	3.23887e-05	0.000579796
ENSG00000105707	2.27977	0.644413	3.24858e-05	0.000580954
ENSG00000163428	1.04016	5.65015	3.28556e-05	0.000585234
ENSG00000232774	3.15382	0.42801	3.32529e-05	0.000591724
ENSG00000186907	1.53161	2.54714	3.37935e-05	0.000600748
ENSG00000256940	2.21115	1.69001	3.41827e-05	0.000606464
ENSG00000179387	1.06443	4.545	3.42439e-05	0.000606949
ENSG00000171522	1.78727	0.2121	3.43251e-05	0.000607787
ENSG00000188883	1.52036	0.416393	3.47416e-05	0.000614557
ENSG00000237686	2.24163	2.20134	3.48299e-05	0.000615286
ENSG00000126903	1.38096	5.2604	3.48858e-05	0.000615286
ENSG00000158683	1.82015	0.734928	3.51698e-05	0.000619502
ENSG00000125384	1.30917	3.62725	3.51939e-05	0.000619502
ENSG00000133055	2.11304	0.471534	3.57081e-05	0.000627938
ENSG00000179294	1.26123	3.93439	3.64551e-05	0.000637979
ENSG00000121005	1.90966	0.0880299	3.64753e-05	0.000637979
ENSG00000124602	2.11361	2.31398	3.65178e-05	0.000637979
ENSG00000175352	1.79577	2.85885	3.68454e-05	0.000642087
ENSG00000236098	1.70872	2.50737	3.69065e-05	0.000642087
ENSG00000144485	1.80838	4.37873	3.7e-05	0.00064309
ENSG00000129514	1.62734	2.69503	3.71488e-05	0.000645051
ENSG00000135074	1.18552	4.41478	3.7207e-05	0.000645437
ENSG00000249064	1.69917	1.0911	3.73519e-05	0.000646858
ENSG00000111110	1.18173	3.78506	3.76782e-05	0.00065172
ENSG00000181409	1.65985	0.874044	3.81945e-05	0.000659379
ENSG00000131037	4.61062	0.878501	3.83953e-05	0.000662208
ENSG00000134258	3.25518	0.271075	3.85232e-05	0.000663132
ENSG00000253549	1.4488	1.71954	3.85598e-05	0.000663132
ENSG00000152377	1.709	5.04193	3.87747e-05	0.00066619
ENSG00000184307	1.20102	2.78256	3.9578e-05	0.000678042
ENSG00000123358	1.75945	2.33676	3.96614e-05	0.000678823
ENSG00000249406	3.16729	-0.227215	3.98578e-05	0.000680885
ENSG00000125872	1.83068	5.96221	4.02335e-05	0.000685996
ENSG00000224596	1.59884	2.29916	4.06522e-05	0.000691164
ENSG00000102109	1.50091	2.19314	4.16758e-05	0.000706559
ENSG00000142303	1.82736	1.1366	4.18156e-05	0.000707974
ENSG00000136943	1.15084	4.29238	4.18383e-05	0.000707974
ENSG00000061656	1.59213	2.63361	4.28389e-05	0.000722862
ENSG00000134352	1.00154	6.41316	4.30084e-05	0.000725039
ENSG00000197208	1.91875	0.385226	4.32754e-05	0.000728855
ENSG00000146374	2.18883	0.438274	4.34441e-05	0.00073062
ENSG00000261762	1.23187	1.64935	4.34688e-05	0.00073062
ENSG00000172893	1.07704	7.01247	4.35024e-05	0.00073062
ENSG00000108852	1.31773	4.0195	4.3572e-05	0.000731104
ENSG00000196337	2.02099	0.251016	4.38483e-05	0.000735054
ENSG00000091622	1.12631	4.1495	4.43535e-05	0.000742183
ENSG00000168497	1.30097	6.48787	4.43564e-05	0.000742183
ENSG00000168546	2.37484	-0.360627	4.4406e-05	0.00074232
ENSG00000092068	3.07565	0.273039	4.46534e-05	0.000745557
ENSG00000157514	1.07167	5.24518	4.46827e-05	0.000745557
ENSG00000257556	1.55887	1.81761	4.55493e-05	0.000757902
ENSG00000163491	1.30927	3.14571	4.67762e-05	0.000776156
ENSG00000095794	1.21388	3.91538	4.7406e-05	0.000784429
ENSG00000148153	1.37479	4.49234	4.78435e-05	0.000790939
ENSG00000234043	1.26837	2.33087	4.81005e-05	0.000792996
ENSG00000135973	2.06136	1.45056	4.82118e-05	0.000794099
ENSG00000019186	2.64672	3.53179	4.87379e-05	0.000802029
ENSG00000272221	1.45738	0.910766	4.98986e-05	0.000818127
ENSG00000133401	1.42534	1.91385	5.01391e-05	0.000821319
ENSG00000261764	1.51195	1.39892	5.03514e-05	0.000823037
ENSG00000196420	2.56683	1.06655	5.03816e-05	0.000823037
ENSG00000156453	3.10631	4.64899	5.06414e-05	0.000825027
ENSG00000161921	2.77779	0.0520359	5.09319e-05	0.000827304
ENSG00000197375	1.17339	3.55995	5.12117e-05	0.00082957
ENSG00000160318	1.56034	0.767118	5.19033e-05	0.000838729
ENSG00000173825	1.30915	1.298	5.19675e-05	0.000839011
ENSG00000239268	1.42334	0.91277	5.2041e-05	0.000839442
ENSG00000162975	1.54586	2.15888	5.2092e-05	0.00083951
ENSG00000188511	2.53745	1.42064	5.29268e-05	0.000851434
ENSG00000214012	1.16882	3.5458	5.36713e-05	0.000861094
ENSG00000151689	1.38963	0.599599	5.42506e-05	0.000868516
ENSG00000137752	4.23784	-0.52536	5.45779e-05	0.000870964
ENSG00000244515	1.34012	1.86299	5.47234e-05	0.000872394
ENSG00000154639	1.39148	5.52223	5.4815e-05	0.00087242
ENSG00000101017	1.03784	3.12087	5.49659e-05	0.000874045
ENSG00000119514	1.58834	0.870888	5.50525e-05	0.000874245
ENSG00000187134	1.54255	2.94013	5.50759e-05	0.000874245
ENSG00000175093	3.26472	-0.124987	5.5268e-05	0.000876518
ENSG00000121316	1.03137	3.21496	5.57808e-05	0.000883089
ENSG00000189171	1.07659	5.77118	5.63668e-05	0.000891579
ENSG00000236453	2.0647	1.91782	5.79895e-05	0.000915632
ENSG00000095203	1.2654	2.01361	5.80932e-05	0.000916462
ENSG00000062038	1.87391	1.69111	5.83592e-05	0.000919042
ENSG00000197956	1.42171	8.00397	5.87414e-05	0.000923513
ENSG00000070404	1.89118	5.64188	5.87732e-05	0.000923513
ENSG00000181690	1.14824	2.08058	5.89433e-05	0.000924106
ENSG00000166165	1.11156	7.72857	5.89472e-05	0.000924106
ENSG00000226878	2.11989	1.37009	5.98581e-05	0.000936889
ENSG00000092969	1.10994	5.90677	5.99506e-05	0.000937519
ENSG00000109321	1.66632	0.590024	6.16114e-05	0.000960978
ENSG00000007237	1.81723	3.93851	6.2145e-05	0.000968458
ENSG00000129946	2.2271	2.36501	6.23071e-05	0.000970142
ENSG00000126709	2.0945	1.93069	6.24018e-05	0.000970773
ENSG00000160255	2.01307	3.66732	6.28188e-05	0.000976414
ENSG00000260920	1.00128	2.51025	6.29069e-05	0.000976936
ENSG00000111799	1.27641	6.61255	6.31486e-05	0.000979841
ENSG00000258611	1.69771	2.09456	6.45274e-05	0.00100037
ENSG00000260053	1.5996	1.52999	6.48513e-05	0.00100452
ENSG00000267372	2.76082	1.41539	6.55173e-05	0.00101309
ENSG00000250221	2.31598	-0.0993258	6.58078e-05	0.00101671
ENSG00000172159	1.01036	4.71909	6.75306e-05	0.00103974
ENSG00000216819	1.48964	0.997914	6.84335e-05	0.00105274
ENSG00000187800	1.54697	2.24672	6.85892e-05	0.00105423
ENSG00000170498	5.86115	0.335642	6.8678e-05	0.00105469
ENSG00000148204	1.67106	3.72058	6.91728e-05	0.00106138
ENSG00000165312	1.65599	1.29515	6.93762e-05	0.0010635
ENSG00000258947	1.20699	1.56428	6.96722e-05	0.0010663
ENSG00000217236	1.199	1.37097	7.02596e-05	0.00107255
ENSG00000268785	1.38873	1.01568	7.2254e-05	0.00110019
ENSG00000159164	1.55788	5.1477	7.36968e-05	0.0011212
ENSG00000227764	1.54962	0.788265	7.59828e-05	0.00115207
ENSG00000077942	1.00114	8.96898	7.75669e-05	0.00117369
ENSG00000130768	1.31643	3.01167	7.82565e-05	0.00118255
ENSG00000184669	1.27624	1.37206	7.83525e-05	0.001183
ENSG00000130751	1.92676	2.6624	8.08051e-05	0.00121594
ENSG00000152778	1.42716	1.06981	8.15854e-05	0.00122503
ENSG00000226823	1.58737	-0.0910813	8.16137e-05	0.00122503
ENSG00000185338	1.07207	2.78552	8.34239e-05	0.00124906
ENSG00000123685	1.35426	1.65547	8.4334e-05	0.00126163
ENSG00000086619	1.38129	2.25718	8.52917e-05	0.00127266
ENSG00000164393	3.09237	0.931304	8.53548e-05	0.00127266
ENSG00000258053	1.5414	0.863652	8.55167e-05	0.00127401
ENSG00000253282	2.69609	-0.242671	8.57898e-05	0.00127702
ENSG00000074047	1.7858	1.07394	8.5931e-05	0.00127806
ENSG00000253111	2.90137	0.653206	8.66088e-05	0.00128601
ENSG00000223599	1.12351	5.02866	8.72323e-05	0.0012942
ENSG00000258010	2.2908	0.71365	8.87423e-05	0.00131391
ENSG00000142197	1.25874	4.87622	8.87803e-05	0.00131391
ENSG00000176692	1.39615	0.930257	8.94027e-05	0.00132202
ENSG00000147408	1.33255	1.83589	9.0104e-05	0.0013302
ENSG00000153162	1.84293	1.0923	9.36715e-05	0.00138173
ENSG00000088836	1.19488	2.99736	9.5096e-05	0.00139814
ENSG00000114573	1.08721	6.82522	9.58064e-05	0.00140577
ENSG00000094975	1.01946	5.5716	9.58498e-05	0.00140577
ENSG00000117472	2.6509	1.03856	9.63394e-05	0.0014118
ENSG00000129991	1.1753	2.0822	9.76844e-05	0.00142917
ENSG00000131477	1.29771	1.12304	9.79919e-05	0.0014325
ENSG00000115919	1.80592	1.93772	9.81043e-05	0.00143298
ENSG00000135116	2.85629	2.11958	9.9161e-05	0.00144606
ENSG00000229656	1.22262	3.28414	9.93835e-05	0.00144812
ENSG00000162407	1.86572	2.48609	9.96892e-05	0.0014514
ENSG00000095303	1.51709	3.37049	0.000100319	0.00145703
ENSG00000237978	1.00661	1.82388	0.000100589	0.00145976
ENSG00000254871	1.15137	2.6984	0.000101223	0.00146679
ENSG00000248893	1.30899	2.05973	0.000102097	0.00147448
ENSG00000270002	1.97367	3.17506	0.000102615	0.0014784
ENSG00000067141	1.96602	1.73727	0.000102977	0.00148123
ENSG00000123329	1.62112	0.0229056	0.000103532	0.00148803
ENSG00000132915	3.01527	0.161168	0.000103764	0.00149016
ENSG00000258088	1.40472	1.14574	0.00010466	0.00150183
ENSG00000154930	2.05841	3.37291	0.000105468	0.00151101
ENSG00000186862	1.53462	0.331739	0.000107031	0.00153095
ENSG00000240668	1.55462	0.822754	0.000107349	0.00153428
ENSG00000176855	1.24328	2.54284	0.000107669	0.0015364
ENSG00000204444	1.38435	2.46493	0.000108744	0.0015505
ENSG00000237249	1.14034	1.46502	0.00010911	0.00155368
ENSG00000074181	1.65385	5.13559	0.000109139	0.00155368
ENSG00000165887	1.35396	0.671718	0.000109925	0.00156363
ENSG00000227359	1.5465	1.04824	0.000110625	0.00157233
ENSG00000155792	2.60201	3.69222	0.00011306	0.00160186
ENSG00000167779	1.3511	3.66193	0.000113161	0.00160202
ENSG00000166922	1.72228	0.534624	0.000113559	0.00160639
ENSG00000159753	1.46847	2.74686	0.00011467	0.00162084
ENSG00000184160	1.4675	2.25827	0.000117987	0.00166248
ENSG00000196196	1.56079	2.63508	0.000118665	0.00167072
ENSG00000156475	2.66699	0.111273	0.000119587	0.00168177
ENSG00000205436	1.78344	0.681241	0.000120077	0.00168531
ENSG00000172889	1.08191	4.08082	0.000120275	0.00168561
ENSG00000167964	1.32646	2.62888	0.000120287	0.00168561
ENSG00000142798	1.10636	6.52937	0.000120548	0.00168664
ENSG00000000003	1.71365	2.30393	0.000123601	0.00172531
ENSG00000005981	2.47503	-0.467923	0.00012434	0.00173293
ENSG00000267280	1.35514	1.31007	0.000125686	0.00174772
ENSG00000157613	1.73392	0.963787	0.000126139	0.00175256
ENSG00000259000	1.15674	4.79288	0.000126757	0.00175978
ENSG00000023902	1.30295	1.67869	0.000127447	0.001768
ENSG00000164116	1.28311	3.79822	0.000127789	0.00177137
ENSG00000230863	1.11775	2.75533	0.00012929	0.00179079
ENSG00000125378	1.62766	2.24575	0.000130658	0.00180556
ENSG00000244468	2.22819	-0.288597	0.000131874	0.00182096
ENSG00000089127	1.80579	1.42771	0.000133821	0.00184359
ENSG00000166446	1.98495	0.437809	0.000136861	0.00187682
ENSG00000163898	2.18412	3.06752	0.000140458	0.00191904
ENSG00000155368	1.0199	7.73864	0.000140635	0.00191976
ENSG00000172548	1.51657	1.12739	0.000141971	0.00193652
ENSG00000115041	1.0061	4.38696	0.000146011	0.0019871
ENSG00000184979	1.28719	1.2328	0.000147194	0.00200016
ENSG00000203279	1.84482	0.894529	0.000148213	0.00201249
ENSG00000184305	1.45856	0.675161	0.000150353	0.00203846
ENSG00000146147	3.33508	0.393831	0.000150711	0.00204177
ENSG00000164488	1.49331	1.62316	0.000151012	0.0020443
ENSG00000134013	1.07845	7.71531	0.00015122	0.00204557
ENSG00000164920	1.44421	1.59411	0.000152379	0.00205403
ENSG00000144681	1.0153	3.25605	0.000152417	0.00205403
ENSG00000137843	1.20775	1.79451	0.0001558	0.00209282
ENSG00000109654	1.00378	4.29152	0.00015653	0.00209998
ENSG00000120708	1.06735	9.05517	0.000157719	0.00211277
ENSG00000164603	1.13764	3.29411	0.000161135	0.00215261
ENSG00000163131	1.69962	0.398349	0.000162481	0.00216847
ENSG00000256018	2.24324	-0.196391	0.00016269	0.00216964
ENSG00000139329	1.79053	2.44955	0.00016293	0.00217124
ENSG00000178826	1.49246	5.01481	0.000163095	0.00217181
ENSG00000235398	1.25877	1.2565	0.000163982	0.00217878
ENSG00000177432	1.07802	1.81251	0.000164511	0.00218418
ENSG00000163064	1.80199	0.018007	0.000166077	0.00220335
ENSG00000140807	2.09424	0.0445864	0.00016689	0.0022125
ENSG00000162520	1.44741	1.40848	0.000168144	0.00222583
ENSG00000099957	1.73201	1.73566	0.000169033	0.00223595
ENSG00000269609	1.07866	3.6138	0.000171166	0.00225826
ENSG00000119900	1.15735	7.06613	0.00017405	0.00228904
ENSG00000263096	2.37238	0.793509	0.000174917	0.00229719
ENSG00000112561	1.46089	0.786652	0.000175102	0.00229719
ENSG00000172465	1.122	3.64677	0.000177503	0.00232399
ENSG00000232480	1.54337	2.19113	0.000179205	0.00234116
ENSG00000138311	1.59051	1.43162	0.000180319	0.00234886
ENSG00000155367	1.10679	1.40614	0.00018063	0.00235121
ENSG00000183484	1.37798	1.55098	0.000181476	0.00236051
ENSG00000000971	1.53376	7.15175	0.000182242	0.00236742
ENSG00000166106	1.14792	4.81543	0.000182272	0.00236742
ENSG00000196564	1.37505	1.38476	0.000189622	0.002454
ENSG00000072818	1.83344	0.879517	0.000189873	0.00245548
ENSG00000205426	2.0498	-0.0543912	0.000190692	0.0024643
ENSG00000117525	1.22361	2.48885	0.000191702	0.00247378
ENSG00000108846	1.61645	6.06509	0.000191981	0.0024756
ENSG00000165046	1.42832	3.31388	0.000192379	0.0024768
ENSG00000198246	1.34085	2.60649	0.000192488	0.0024768
ENSG00000261452	1.85628	2.18827	0.000195286	0.00250382
ENSG00000183098	1.12597	3.42308	0.000195678	0.00250581
ENSG00000166923	2.14088	-0.190954	0.000195786	0.00250581
ENSG00000162415	1.58464	1.86159	0.00019586	0.00250581
ENSG00000227534	1.27695	1.62207	0.000196521	0.00250979
ENSG00000162746	1.17546	1.0005	0.000196716	0.00250979
ENSG00000249992	1.09973	2.96173	0.000198519	0.00252184
ENSG00000189127	2.04711	-0.306693	0.000198748	0.00252296
ENSG00000261305	2.07344	-0.457289	0.000199947	0.0025346
ENSG00000182687	1.71594	-0.219938	0.000200165	0.00253556
ENSG00000237782	1.39741	1.67897	0.000201315	0.00254834
ENSG00000065413	1.46075	1.53625	0.000202302	0.00255902
ENSG00000143845	1.16588	3.56476	0.000203096	0.00256726
ENSG00000237517	2.05005	2.9167	0.000203478	0.002569
ENSG00000149150	1.44596	2.69614	0.000203521	0.002569
ENSG00000185519	1.78702	-0.140913	0.000204774	0.00257937
ENSG00000144331	1.88892	1.30122	0.000208153	0.00261827
ENSG00000137766	1.35897	3.29318	0.000209607	0.0026347
ENSG00000166741	1.02263	7.56305	0.000209783	0.00263507
ENSG00000178695	1.61975	0.823144	0.000210991	0.00264839
ENSG00000186510	2.47897	-0.153968	0.000211155	0.00264859
ENSG00000116717	1.65533	4.80275	0.000213065	0.00266882
ENSG00000181085	1.79387	-0.216496	0.000216827	0.00271026
ENSG00000113657	1.36621	7.88777	0.000220467	0.00274238
ENSG00000068650	1.44307	2.41175	0.000224389	0.00278153
ENSG00000106366	1.85858	4.88432	0.000225228	0.00278689
ENSG00000145675	1.01756	5.66177	0.000225288	0.00278689
ENSG00000228630	1.73799	0.287729	0.000227558	0.00281109
ENSG00000170370	2.33724	0.240718	0.000227911	0.00281337
ENSG00000237939	1.06332	4.27994	0.000231493	0.00285185
ENSG00000172602	2.40559	0.679914	0.000234061	0.00287362
ENSG00000125744	1.32763	2.68469	0.000235378	0.00288583
ENSG00000048052	1.12936	4.67881	0.00023695	0.00289935
ENSG00000095383	1.15241	4.92974	0.000236966	0.00289935
ENSG00000225889	1.28268	1.41522	0.00023834	0.00290824
ENSG00000144063	2.19402	-0.472261	0.000238573	0.0029091
ENSG00000019485	1.15841	3.62315	0.000239318	0.00291594
ENSG00000122641	1.69593	2.24513	0.000239459	0.00291594
ENSG00000186792	1.45003	4.11931	0.000241964	0.00293846
ENSG00000007866	1.14172	3.55517	0.000242833	0.00294702
ENSG00000011422	1.00625	5.36735	0.00024342	0.00295214
ENSG00000178038	1.30714	1.0021	0.000243671	0.00295236
ENSG00000141505	1.33179	0.38196	0.000244198	0.0029553
ENSG00000110042	1.8456	0.486916	0.000245392	0.00296604
ENSG00000197415	1.3011	4.57233	0.000249751	0.00300785
ENSG00000107719	1.86495	0.202129	0.000249857	0.00300785
ENSG00000135638	2.17414	1.36716	0.000251087	0.00302062
ENSG00000125845	1.90611	1.18309	0.000256504	0.00307829
ENSG00000128602	1.80087	4.08452	0.000256567	0.00307829
ENSG00000154678	1.49978	2.54173	0.000256952	0.00308085
ENSG00000182985	1.24678	7.05235	0.00025913	0.00310312
ENSG00000250725	1.2018	1.25982	0.000259156	0.00310312
ENSG00000082497	2.02261	2.13677	0.00026526	0.00316396
ENSG00000160180	1.79134	2.34704	0.000273275	0.00325049
ENSG00000134548	1.59775	6.16205	0.000274616	0.00326211
ENSG00000182747	2.11617	-0.128617	0.00027512	0.00326378
ENSG00000109705	1.87182	1.30018	0.000278032	0.00329396
ENSG00000211445	1.18645	7.91605	0.000280193	0.003313
ENSG00000254991	3.13052	-0.43201	0.000283714	0.00334802
ENSG00000133247	1.15941	3.86748	0.00028664	0.00338031
ENSG00000176463	1.1882	4.87757	0.000287437	0.00338527
ENSG00000237807	3.18989	0.524884	0.000290153	0.00340831
ENSG00000180914	1.52372	1.13046	0.000293169	0.00343922
ENSG00000149596	2.45705	1.64649	0.000297609	0.00348146
ENSG00000169085	2.24377	3.01591	0.000298771	0.00349125
ENSG00000170703	1.94923	1.26988	0.000299744	0.00350033
ENSG00000238142	1.50397	0.78143	0.000301649	0.00351822
ENSG00000196189	1.81958	0.435476	0.000301787	0.00351822
ENSG00000128335	1.56555	4.98203	0.000313025	0.00363648
ENSG00000184584	1.12314	1.82504	0.00031341	0.0036386
ENSG00000231840	1.6065	0.0526037	0.000318473	0.00368784
ENSG00000255277	1.57069	0.99596	0.000318857	0.00368989
ENSG00000148677	2.39294	5.01101	0.000320674	0.00370412
ENSG00000171388	2.49044	2.78084	0.000320706	0.00370412
ENSG00000234817	1.52961	-0.232847	0.000321347	0.00370914
ENSG00000245750	1.3712	1.17011	0.000323966	0.00373456
ENSG00000258077	1.13441	1.46997	0.000329586	0.00377992
ENSG00000250986	1.66433	0.342179	0.000334825	0.00383264
ENSG00000256232	1.96288	-0.139385	0.000336313	0.00384233
ENSG00000104290	1.13096	0.818468	0.000336631	0.00384351
ENSG00000198075	1.51883	5.28711	0.000337495	0.00384848
ENSG00000225205	1.98044	0.0724663	0.000338417	0.00385409
ENSG00000196154	1.97151	4.45738	0.000340451	0.00387479
ENSG00000087303	1.66285	4.7508	0.000344671	0.00391353
ENSG00000173559	1.01721	5.81227	0.000344707	0.00391353
ENSG00000132470	1.88842	0.0994537	0.000346341	0.0039244
ENSG00000154265	1.00239	3.63378	0.000354211	0.00399374
ENSG00000102934	1.36308	3.81012	0.000354242	0.00399374
ENSG00000122547	1.23424	2.86062	0.000354772	0.0039972
ENSG00000105767	1.19409	1.79363	0.000360736	0.00405421
ENSG00000127561	1.83588	3.3185	0.000366191	0.00410779
ENSG00000271109	1.77263	-0.308709	0.000371858	0.00416356
ENSG00000188760	1.48957	2.84601	0.00037327	0.00417552
ENSG00000141655	1.46687	0.086826	0.000373392	0.00417552
ENSG00000143375	1.4489	3.92404	0.000374099	0.00418082
ENSG00000224473	1.01873	2.7895	0.000375291	0.00419153
ENSG00000100628	1.7303	1.03327	0.000380428	0.00424361
ENSG00000142149	2.31666	0.715494	0.00038354	0.00427567
ENSG00000263823	2.2196	-0.697544	0.000384358	0.00428214
ENSG00000113070	2.00272	6.09161	0.000387319	0.00430977
ENSG00000269501	1.62528	0.254357	0.000388244	0.00431738
ENSG00000205502	2.24052	0.196899	0.000389121	0.00432445
ENSG00000202198	2.06963	3.1184	0.000391014	0.00434011
ENSG00000099139	1.88343	1.28041	0.000393545	0.00436274
ENSG00000184185	1.77072	-0.242858	0.000400491	0.0044234
ENSG00000087076	1.67867	1.48804	0.000404064	0.00446012
ENSG00000236064	1.38395	0.0383836	0.000405059	0.00446678
ENSG00000171105	1.69107	0.875086	0.000407306	0.00448212
ENSG00000135636	2.54349	2.38672	0.000409186	0.00449357
ENSG00000084710	1.52754	2.56456	0.000409532	0.00449357
ENSG00000052850	1.3512	-0.0761092	0.000415663	0.00455452
ENSG00000108176	1.16324	2.80264	0.000416159	0.00455717
ENSG00000152669	1.14689	2.09132	0.000418698	0.00457938
ENSG00000001630	1.0244	1.31619	0.000421127	0.00459754
ENSG00000079102	1.98862	0.00924713	0.000422258	0.00460428
ENSG00000104870	1.20213	3.73696	0.000422891	0.00460838
ENSG00000231610	1.41112	0.385559	0.000429034	0.00466965
ENSG00000164532	1.18402	0.581715	0.000440648	0.0047689
ENSG00000133863	1.46163	0.538644	0.000441071	0.0047689
ENSG00000146950	1.81277	0.821908	0.000450113	0.00485197
ENSG00000182132	1.65412	0.589728	0.000452592	0.00487576
ENSG00000130363	1.23068	4.27443	0.000453228	0.00487968
ENSG00000247844	1.42706	0.357751	0.000458631	0.00492898
ENSG00000167748	1.38197	2.49442	0.000460661	0.00494191
ENSG00000198797	1.45892	1.67312	0.000461045	0.00494307
ENSG00000242539	1.30129	1.14463	0.000465814	0.00498526
ENSG00000043591	1.78711	-0.0171742	0.000473274	0.00505606
ENSG00000247763	1.4056	0.0432033	0.000474224	0.00506318
ENSG00000170276	1.23873	1.84058	0.000474928	0.00506769
ENSG00000237605	1.91161	-0.556439	0.000476563	0.00507909
ENSG00000184371	1.17006	5.2357	0.000479398	0.00510324
ENSG00000076864	1.12308	5.98288	0.000479948	0.00510606
ENSG00000111801	1.35855	1.91135	0.000485712	0.00515821
ENSG00000256894	1.36549	0.540004	0.000487667	0.00517591
ENSG00000005243	1.43307	1.35784	0.000488098	0.00517741
ENSG00000146700	1.10818	1.6697	0.000489566	0.00518992
ENSG00000110492	1.11604	8.25921	0.000496176	0.00524449
ENSG00000272091	1.40197	-0.287068	0.000511261	0.00538174
ENSG00000162367	2.01481	-0.109525	0.000514035	0.0054046
ENSG00000215553	1.33665	0.425275	0.000515735	0.00541929
ENSG00000079112	2.65085	0.0360076	0.000528612	0.00553515
ENSG00000171310	1.14139	4.96619	0.000530712	0.00555082
ENSG00000188013	1.01815	3.05821	0.000531609	0.0055568
ENSG00000181350	1.16753	1.17732	0.000535176	0.00558758
ENSG00000186086	1.2962	0.328994	0.000537585	0.00560946
ENSG00000102575	1.83358	7.4399	0.000547666	0.00569807
ENSG00000071073	1.37293	2.12723	0.000552719	0.00574731
ENSG00000198366	1.86446	-0.386296	0.000559823	0.00581108
ENSG00000115902	1.02709	5.69213	0.000560375	0.00581345
ENSG00000119917	1.49561	4.0575	0.000564791	0.00584237
ENSG00000204396	1.58486	2.80284	0.000568959	0.0058707
ENSG00000211584	1.08843	7.47424	0.000569167	0.0058707
ENSG00000107954	1.31727	0.582294	0.000576082	0.00592499
ENSG00000170369	3.99713	-0.931441	0.000580784	0.00596309
ENSG00000171219	1.75864	3.48731	0.000584295	0.00599228
ENSG00000184271	1.43589	0.0871543	0.000587706	0.00602038
ENSG00000167653	2.37898	0.565252	0.000588492	0.00602499
ENSG00000135838	1.83058	-0.120338	0.000589199	0.00602534
ENSG00000213785	1.3882	7.46566	0.000594198	0.006073
ENSG00000231890	1.6424	0.0910365	0.000594552	0.00607316
ENSG00000266899	1.39183	8.09531	0.000597228	0.00609356
ENSG00000119782	1.62368	0.882015	0.00059966	0.0061149
ENSG00000168077	1.31463	4.52305	0.000600187	0.00611679
ENSG00000249396	1.25085	2.49674	0.000603791	0.00614709
ENSG00000101280	1.43532	0.233979	0.000604035	0.00614709
ENSG00000229991	1.38236	6.76201	0.000604188	0.00614709
ENSG00000123342	1.07805	2.65551	0.000610505	0.0061938
ENSG00000136842	1.31429	2.58206	0.000613874	0.00622446
ENSG00000109107	1.16801	3.49331	0.00061545	0.00623691
ENSG00000145725	1.0888	5.67898	0.00062247	0.00630093
ENSG00000223486	1.75213	-0.148477	0.000623363	0.00630285
ENSG00000106537	2.11077	1.20085	0.000628602	0.0063451
ENSG00000261298	2.12132	3.05718	0.000630671	0.0063624
ENSG00000266680	1.96809	-0.51512	0.000636764	0.00641665
ENSG00000238026	1.16205	1.10498	0.000648974	0.00652502
ENSG00000259689	1.26577	1.89337	0.000651394	0.00654203
ENSG00000160886	1.93342	0.614208	0.000652755	0.00655203
ENSG00000177337	1.37693	2.87643	0.000656684	0.00656574
ENSG00000147251	1.02308	3.35202	0.000663405	0.00662186
ENSG00000134824	1.6198	6.27963	0.000676139	0.00673025
ENSG00000168065	1.43931	1.31673	0.000677549	0.00673681
ENSG00000068831	1.39101	0.740648	0.000681841	0.00676074
ENSG00000169403	2.00004	0.453201	0.000688323	0.00680995
ENSG00000143028	1.36016	0.668209	0.000696003	0.00687457
ENSG00000172264	2.08873	1.17646	0.00069785	0.00688901
ENSG00000166801	1.00505	2.2164	0.000703675	0.00693393
ENSG00000168389	1.61655	3.2124	0.000703946	0.00693393
ENSG00000135919	1.23572	8.03661	0.000704977	0.00694027
ENSG00000179715	1.12319	3.9061	0.000706041	0.00694693
ENSG00000260889	1.05359	1.61605	0.000708228	0.00695524
ENSG00000226312	2.42287	1.49345	0.000708436	0.00695524
ENSG00000106031	2.04451	-0.0332347	0.000724851	0.00707765
ENSG00000213452	1.29769	5.07274	0.000725924	0.00708306
ENSG00000167608	1.13552	0.865643	0.000726589	0.00708306
ENSG00000179168	1.3783	0.160996	0.000728199	0.00709105
ENSG00000138193	1.24533	3.41746	0.000729678	0.00710159
ENSG00000007516	1.4189	2.62537	0.000730379	0.00710319
ENSG00000196507	1.07606	3.81575	0.000730634	0.00710319
ENSG00000173727	1.13332	1.33187	0.000738693	0.00717376
ENSG00000258671	1.63234	0.258522	0.000740428	0.00718672
ENSG00000271100	1.19492	0.641671	0.000741177	0.00718679
ENSG00000203706	2.34555	-0.462002	0.000752162	0.00726839
ENSG00000165244	1.00854	5.51755	0.000752187	0.00726839
ENSG00000085662	1.37083	8.68408	0.000752489	0.00726839
ENSG00000148655	1.26305	0.681118	0.000756122	0.00728778
ENSG00000223822	1.29801	-0.074019	0.000756554	0.00728803
ENSG00000113369	1.21728	5.39648	0.000766005	0.00734868
ENSG00000269728	1.20311	1.53715	0.000766811	0.00735131
ENSG00000260244	1.52222	0.221299	0.000769626	0.00737435
ENSG00000105479	1.43443	0.187166	0.000771256	0.00738602
ENSG00000111087	1.98068	1.79965	0.000776766	0.00743085
ENSG00000173698	1.12816	1.12804	0.000785264	0.00750015
ENSG00000205978	1.74362	1.75741	0.000790903	0.00754203
ENSG00000164308	1.38968	6.25883	0.000791331	0.00754203
ENSG00000213438	1.61326	1.2329	0.000794133	0.00756471
ENSG00000259727	1.88983	0.258405	0.0008023	0.00763226
ENSG00000008517	1.67617	2.57549	0.000802504	0.00763226
ENSG00000169213	1.3096	5.99903	0.000811863	0.00770089
ENSG00000163531	1.87995	0.214873	0.000812992	0.00770753
ENSG00000260708	1.27834	1.65028	0.00082313	0.00778307
ENSG00000148180	1.0073	5.32879	0.000828862	0.00782904
ENSG00000258624	1.3058	3.59087	0.000828864	0.00782904
ENSG00000264107	1.91029	1.53608	0.000830729	0.00784072
ENSG00000035862	1.05849	8.10381	0.000830975	0.00784072
ENSG00000203645	1.90173	0.680417	0.00083426	0.00786757
ENSG00000092607	1.61183	0.688964	0.000838322	0.00789757
ENSG00000182272	1.10103	2.09796	0.000846913	0.00796908
ENSG00000030582	1.23639	9.42803	0.000856369	0.00804224
ENSG00000131069	1.15534	4.5196	0.000859449	0.00806695
ENSG00000082684	2.47182	0.365568	0.000861078	0.00807201
ENSG00000175898	1.71276	0.646699	0.000870066	0.00813679
ENSG00000138769	1.12429	0.974109	0.000892826	0.00830634
ENSG00000156966	1.43503	1.51172	0.000904722	0.00839958
ENSG00000272894	1.21384	1.49154	0.000905438	0.00840189
ENSG00000203711	1.57742	2.20484	0.000912361	0.008453
ENSG00000270504	1.67083	1.8068	0.000920985	0.00851532
ENSG00000188211	1.08731	3.60923	0.000927515	0.00854925
ENSG00000184613	2.21254	0.942083	0.000932687	0.00858809
ENSG00000101230	1.878	2.01149	0.000935317	0.00860136
ENSG00000101076	2.17014	0.538756	0.000935468	0.00860136
ENSG00000171017	1.21431	0.872879	0.000936762	0.00860672
ENSG00000263470	1.03788	3.07653	0.000937108	0.00860672
ENSG00000065154	1.06841	4.71908	0.000940378	0.00863232
ENSG00000267534	2.38994	-0.345282	0.000971933	0.00887672
ENSG00000143631	1.58741	5.97743	0.000971951	0.00887672
ENSG00000248958	1.82435	-0.0907093	0.000977686	0.00892456
ENSG00000245522	1.25952	2.73301	0.000984288	0.00897113
ENSG00000131650	1.57535	5.16897	0.000985997	0.00898214
ENSG00000135828	1.18217	1.44879	0.000989627	0.00900606
ENSG00000135333	1.01755	4.18554	0.000995664	0.00904723
ENSG00000128591	1.53687	6.55215	0.00101234	0.0091524
ENSG00000091986	2.00265	5.36753	0.00101349	0.00915814
ENSG00000112406	2.02931	1.84167	0.00101469	0.00916441
ENSG00000135048	1.12001	6.92629	0.00101776	0.00917824
ENSG00000131370	1.03517	1.20208	0.00101938	0.00918827
ENSG00000168056	1.20524	7.13838	0.00102707	0.00923828
ENSG00000166401	1.13988	2.62879	0.00102802	0.00923828
ENSG00000205595	1.31957	0.503699	0.00103706	0.00930551
ENSG00000267248	1.25214	0.561436	0.00105683	0.00944987
ENSG00000154274	1.44736	1.00395	0.0010777	0.0095982
ENSG00000164509	2.25617	1.92533	0.0010807	0.00962009
ENSG00000115318	1.19258	2.1792	0.00109278	0.00970833
ENSG00000146409	1.31794	2.94817	0.00109573	0.00971492
ENSG00000172803	1.17515	0.488864	0.00110639	0.00980016
ENSG00000085117	1.19277	3.58925	0.00111882	0.00988101
ENSG00000231025	1.27465	1.83959	0.00112367	0.00991892
ENSG00000141448	1.20607	3.16297	0.0011275	0.00994013
ENSG00000214517	1.46307	7.76984	0.00112923	0.00994841
ENSG00000169562	1.27462	2.02987	0.00114847	0.0100616
ENSG00000174307	1.12359	4.40601	0.00115381	0.0101005
ENSG00000227908	1.85263	-0.454825	0.00116754	0.0102057
ENSG00000253227	2.2835	0.235589	0.00117464	0.0102578
ENSG00000112276	1.48726	1.01464	0.00118393	0.0103138
ENSG00000117407	1.47342	0.201723	0.00118533	0.010321
ENSG00000097096	1.12657	1.33105	0.00119015	0.0103445
ENSG00000182179	2.69595	0.746147	0.00119198	0.0103538
ENSG00000146666	2.26181	0.0147849	0.00121552	0.010524
ENSG00000164823	1.07215	6.74916	0.00121627	0.010524
ENSG00000149212	1.49719	1.1984	0.00122733	0.0105942
ENSG00000114529	1.28792	4.34147	0.00123114	0.0106219
ENSG00000123609	1.08775	4.17785	0.00123801	0.0106556
ENSG00000143369	1.5833	2.63263	0.00131783	0.0112123
ENSG00000188833	1.79979	0.965085	0.00132059	0.0112209
ENSG00000149043	2.17848	0.19137	0.0013373	0.011336
ENSG00000108797	1.04946	5.49154	0.00134486	0.0113948
ENSG00000224818	1.10115	0.864598	0.00135992	0.0114898
ENSG00000264644	1.1309	2.4772	0.0013808	0.011617
ENSG00000175567	1.35614	7.51917	0.00138681	0.011655
ENSG00000244041	1.01162	0.92806	0.00139139	0.0116841
ENSG00000180769	1.1639	2.28433	0.0014005	0.0117442
ENSG00000110723	1.33987	1.7396	0.0014023	0.0117483
ENSG00000138356	2.15265	1.70684	0.00141448	0.0118185
ENSG00000112096	1.21261	7.22094	0.00142136	0.0118636
ENSG00000149564	1.37511	6.26983	0.00143778	0.0119642
ENSG00000183087	1.17338	2.12815	0.00144003	0.0119749
ENSG00000070731	1.35344	0.473914	0.00146027	0.0121151
ENSG00000146955	1.3755	0.533673	0.00147215	0.0121968
ENSG00000075461	1.0704	3.10775	0.00149589	0.0123592
ENSG00000174004	1.22053	1.25096	0.00150226	0.0123996
ENSG00000158008	1.13416	0.435477	0.00150286	0.0123996
ENSG00000152056	1.07543	4.53979	0.00150654	0.0124186
ENSG00000104237	1.04343	1.2371	0.00151116	0.0124452
ENSG00000224843	1.58568	-0.210923	0.00152472	0.0125415
ENSG00000268041	1.19558	0.113505	0.00152495	0.0125415
ENSG00000143473	1.04209	2.77498	0.00153792	0.0126365
ENSG00000167601	1.10776	8.61032	0.00153874	0.0126375
ENSG00000176678	1.69693	1.10273	0.00155672	0.0127385
ENSG00000149926	1.05432	0.770202	0.00156363	0.0127602
ENSG00000127325	1.2678	3.08257	0.00156454	0.0127618
ENSG00000204967	1.05924	2.08532	0.00158716	0.0129052
ENSG00000099869	1.57848	-0.24122	0.00161187	0.0130706
ENSG00000267898	1.3904	0.352267	0.00161751	0.0130986
ENSG00000258245	1.0611	0.51683	0.00163	0.0131581
ENSG00000203326	1.06482	2.46577	0.00163306	0.0131593
ENSG00000116299	1.89407	2.88082	0.00163556	0.0131674
ENSG00000006638	1.02187	0.749923	0.00163929	0.0131856
ENSG00000196611	3.076	2.03862	0.00164878	0.013256
ENSG00000180628	1.24874	1.69363	0.00166891	0.0133878
ENSG00000164484	2.55023	1.77401	0.00168381	0.0134893
ENSG00000079931	1.29625	4.7741	0.00170138	0.0135997
ENSG00000198088	1.56855	1.16784	0.00176761	0.0140602
ENSG00000127824	1.12361	7.34188	0.00179445	0.0142106
ENSG00000240990	1.63258	-0.0382112	0.00180953	0.0143174
ENSG00000243885	1.81476	0.137811	0.00181044	0.0143183
ENSG00000214533	1.17999	0.587742	0.00181138	0.0143194
ENSG00000232970	1.17033	1.02813	0.00184496	0.0145273
ENSG00000233822	1.26971	0.114269	0.00185203	0.0145637
ENSG00000213489	1.00882	1.99768	0.00186271	0.0146314
ENSG00000112183	1.70499	3.54082	0.00186317	0.0146314
ENSG00000272579	1.18192	1.16265	0.00186471	0.0146314
ENSG00000257113	1.23597	0.375931	0.00189224	0.0147891
ENSG00000257642	1.13129	2.63099	0.00190252	0.0148372
ENSG00000139629	1.02801	4.20501	0.00191442	0.014917
ENSG00000119632	1.26508	3.26947	0.00191653	0.014927
ENSG00000108786	1.0819	0.959208	0.00197587	0.0152896
ENSG00000227060	1.49205	0.633438	0.00198087	0.0153216
ENSG00000142279	1.5902	3.63554	0.00200866	0.0155032
ENSG00000134962	1.85798	0.94893	0.00206242	0.0158567
ENSG00000136114	1.01006	4.28854	0.00206671	0.0158761
ENSG00000262888	2.33271	-0.555665	0.00207627	0.0159359
ENSG00000162144	1.20561	5.19249	0.00210031	0.016079
ENSG00000175048	1.15576	1.53012	0.00215281	0.016397
ENSG00000203722	1.60241	0.994496	0.00215657	0.0164101
ENSG00000152503	1.32514	0.722218	0.00217462	0.0164791
ENSG00000172005	1.66447	6.21345	0.0021906	0.0165682
ENSG00000167306	1.02484	3.55336	0.00220342	0.0166341
ENSG00000065923	1.37284	-0.377242	0.00220597	0.0166464
ENSG00000225255	1.57653	1.16108	0.0022471	0.0168928
ENSG00000120054	1.53626	1.72243	0.00226753	0.0170321
ENSG00000174083	1.57172	-0.473509	0.00227144	0.0170543
ENSG00000206432	1.32751	2.16363	0.00227324	0.0170607
ENSG00000054392	1.26159	4.40386	0.00228546	0.0171325
ENSG00000164938	1.54779	2.55238	0.00229721	0.0171974
ENSG00000104901	1.45088	-0.0579416	0.00230097	0.0172184
ENSG00000138622	1.21669	0.846787	0.00230633	0.0172316
ENSG00000124440	1.642	1.684	0.00231039	0.0172529
ENSG00000154654	1.44041	0.260339	0.0023198	0.0172909
ENSG00000197587	1.38116	1.07707	0.0023273	0.0173061
ENSG00000154822	1.3199	2.84468	0.00232832	0.0173061
ENSG00000163412	1.04742	1.35982	0.00233035	0.0173079
ENSG00000267473	1.1101	1.10501	0.00233224	0.0173079
ENSG00000163683	2.42893	3.52849	0.00241953	0.0178011
ENSG00000233942	1.83392	-0.0640333	0.00244691	0.0179804
ENSG00000159733	1.54387	0.191097	0.00247608	0.0181576
ENSG00000168016	1.7314	-0.314624	0.0024791	0.0181723
ENSG00000179299	1.19003	1.26804	0.00250357	0.0182994
ENSG00000259359	1.41342	1.73379	0.00250358	0.0182994
ENSG00000240541	1.67437	-0.280801	0.0025641	0.0186297
ENSG00000260833	1.24153	4.57655	0.0025781	0.0187142
ENSG00000125820	1.25535	0.589898	0.00257911	0.0187142
ENSG00000187260	1.20224	1.64836	0.00258406	0.018735
ENSG00000251442	1.18766	0.827842	0.00261144	0.0188953
ENSG00000114378	1.65403	0.234542	0.00262102	0.0189493
ENSG00000257647	1.46098	-0.205208	0.0026321	0.0190064
ENSG00000104888	1.14962	0.608879	0.00264083	0.0190465
ENSG00000233521	2.58724	0.980288	0.00265967	0.0191515
ENSG00000229896	1.27228	-0.14535	0.00266601	0.0191587
ENSG00000160097	1.36836	-0.207641	0.00266777	0.0191637
ENSG00000099866	1.54056	-0.0533201	0.00268604	0.019241
ENSG00000128578	1.41851	3.06323	0.0027067	0.0193581
ENSG00000104267	1.76319	7.85489	0.0027268	0.0194553
ENSG00000182986	1.70436	0.169066	0.0027663	0.0196667
ENSG00000105974	1.02287	7.90933	0.0028028	0.0198868
ENSG00000182217	1.0872	1.89919	0.00281693	0.0199634
ENSG00000142273	1.92192	0.0665772	0.00284647	0.0201171
ENSG00000107562	2.97023	1.00179	0.00284976	0.0201252
ENSG00000196544	1.04096	3.38585	0.00284986	0.0201252
ENSG00000231020	1.32162	-0.144	0.00285609	0.0201612
ENSG00000171621	1.05589	4.86847	0.00288434	0.0203047
ENSG00000164120	1.70946	5.62872	0.00289341	0.0203367
ENSG00000131400	1.5103	2.25697	0.00291737	0.020489
ENSG00000158292	1.44455	2.89963	0.00294249	0.020617
ENSG00000254142	1.52564	1.83864	0.00296806	0.020747
ENSG00000253361	1.27966	0.621989	0.0030018	0.0209344
ENSG00000128564	3.56399	6.90686	0.00302406	0.0210651
ENSG00000107796	1.71307	0.251733	0.00302584	0.0210693
ENSG00000172780	1.18521	0.562199	0.00303508	0.021109
ENSG00000221963	1.41823	5.58771	0.00304307	0.0211482
ENSG00000182326	1.13174	1.47063	0.00305651	0.0212334
ENSG00000179627	1.2366	2.14218	0.00307441	0.021313
ENSG00000117152	1.34728	1.35077	0.00307509	0.021313
ENSG00000258655	1.16689	0.809296	0.00308119	0.021347
ENSG00000120594	1.03902	5.70416	0.00309369	0.021417
ENSG00000182902	1.23495	1.3912	0.00311385	0.0215046
ENSG00000251468	1.15873	2.33559	0.00311474	0.0215046
ENSG00000169903	1.78849	3.93719	0.00313384	0.0216032
ENSG00000266278	1.83861	0.438852	0.00316664	0.0218126
ENSG00000168427	1.33833	2.59732	0.00316892	0.02182
ENSG00000197496	1.59406	0.939044	0.0032231	0.022142
ENSG00000184254	1.40889	5.9342	0.00322623	0.0221518
ENSG00000181885	1.14004	-0.0575093	0.00325452	0.022281
ENSG00000129214	1.59843	0.207508	0.003262	0.0223237
ENSG00000132965	2.65522	-0.207218	0.00327543	0.02239
ENSG00000236751	1.69225	1.89764	0.00331723	0.0226121
ENSG00000132481	1.00126	5.36394	0.00333679	0.0226884
ENSG00000118898	1.24458	4.11557	0.00334274	0.0227067
ENSG00000165548	1.64192	0.305974	0.00334424	0.0227067
ENSG00000169071	1.56732	4.16901	0.00336908	0.0228387
ENSG00000167105	1.60595	2.22925	0.00338177	0.0228909
ENSG00000107742	1.08087	0.163555	0.00339292	0.0229295
ENSG00000165092	1.65476	7.542	0.00339997	0.0229613
ENSG00000248506	1.2032	0.386821	0.00341636	0.0230633
ENSG00000255201	1.55156	1.59449	0.00345081	0.0232323
ENSG00000106804	1.1435	2.61354	0.00345175	0.0232323
ENSG00000087589	1.77613	-0.10091	0.00345447	0.0232331
ENSG00000239815	1.12771	0.0966092	0.0034753	0.023347
ENSG00000074966	2.47076	0.452919	0.00349754	0.0234788
ENSG00000229167	1.83483	-0.379819	0.0035227	0.0236036
ENSG00000172458	1.59412	-0.221233	0.00359656	0.0239998
ENSG00000232159	1.21472	-0.229448	0.00360869	0.0240628
ENSG00000102554	1.16731	3.94242	0.0036152	0.024096
ENSG00000259153	1.48329	3.64521	0.00369901	0.0245693
ENSG00000170681	1.23437	0.00274078	0.00372992	0.0247242
ENSG00000224020	1.37167	0.195163	0.00373677	0.0247421
ENSG00000130045	1.26289	0.513126	0.00380612	0.0251104
ENSG00000116774	1.20493	3.52738	0.00400133	0.0260894
ENSG00000248727	1.25385	0.0263426	0.00400367	0.0260952
ENSG00000162391	1.17112	0.0646263	0.00401421	0.0261543
ENSG00000188868	1.16229	1.46312	0.00402091	0.0261694
ENSG00000131015	1.33977	3.99389	0.00404688	0.0262647
ENSG00000253669	1.87336	2.29773	0.00405485	0.0263044
ENSG00000115935	1.22646	2.94261	0.00406091	0.0263311
ENSG00000036448	1.29683	1.06669	0.00406189	0.0263311
ENSG00000128596	1.3915	1.1047	0.00413645	0.0267275
ENSG00000104213	1.30641	0.474176	0.00417626	0.0269459
ENSG00000246640	1.62678	1.83051	0.00418441	0.0269888
ENSG00000272654	1.02365	0.2279	0.00422127	0.0271718
ENSG00000115255	1.11142	4.3124	0.00422187	0.0271718
ENSG00000231453	1.02327	1.96001	0.00424511	0.0272856
ENSG00000163082	2.01781	2.73706	0.00425832	0.0273573
ENSG00000204540	1.23634	0.026841	0.0043065	0.0276038
ENSG00000197142	2.0961	1.82324	0.0043401	0.0277633
ENSG00000108309	1.94286	1.01061	0.00438738	0.0280059
ENSG00000267530	1.36108	1.87837	0.00441399	0.0281446
ENSG00000172346	1.22018	3.0941	0.0044154	0.0281446
ENSG00000256268	1.57388	0.805443	0.00443704	0.0282625
ENSG00000128833	1.30461	2.82756	0.00444255	0.0282775
ENSG00000257931	1.12109	0.473215	0.00444953	0.0283119
ENSG00000262003	1.12326	2.84389	0.00446966	0.0284198
ENSG00000023445	1.55134	4.08629	0.00449243	0.0285263
ENSG00000160111	1.28354	-0.1801	0.00455601	0.0288478
ENSG00000063180	1.35049	4.57629	0.00458324	0.0289485
ENSG00000164932	1.02325	6.83645	0.00458509	0.0289485
ENSG00000160282	1.10096	1.26843	0.00462886	0.0291633
ENSG00000146197	1.14882	0.28722	0.00467366	0.0294042
ENSG00000125629	1.27012	5.17812	0.00471926	0.0296495
ENSG00000167676	1.62461	0.583393	0.00473963	0.0297566
ENSG00000255471	1.09832	1.90421	0.00474621	0.0297875
ENSG00000105467	1.54322	0.503862	0.00475233	0.0298155
ENSG00000188033	1.13656	0.0427756	0.00475482	0.0298207
ENSG00000254531	1.40144	1.22447	0.00479756	0.0300467
ENSG00000168824	1.76058	1.09098	0.00482989	0.030196
ENSG00000243232	1.17803	2.10294	0.00488762	0.0305111
ENSG00000129910	1.05214	0.314767	0.00489449	0.0305365
ENSG00000234498	1.91345	1.79258	0.00491713	0.0306245
ENSG00000168079	1.14504	0.418711	0.00494463	0.0307851
ENSG00000233117	1.85848	0.211383	0.00495987	0.0308479
ENSG00000229662	1.08401	0.157725	0.0049734	0.030882
ENSG00000178821	1.16862	1.44544	0.00497397	0.030882
ENSG00000131242	1.20001	1.83804	0.00501968	0.031112
ENSG00000215333	1.16195	0.457139	0.00503055	0.0311377
ENSG00000005961	1.50238	1.94057	0.00510615	0.0315498
ENSG00000150995	1.60098	3.1792	0.00511577	0.0315983
ENSG00000180869	1.82915	-0.0657757	0.00511994	0.0316132
ENSG00000058335	2.11805	-0.107775	0.00522387	0.0321112
ENSG00000168993	1.66446	1.29278	0.00524519	0.0322312
ENSG00000165215	1.37036	5.22735	0.00532157	0.0326112
ENSG00000128683	1.00059	1.80427	0.0053316	0.0326615
ENSG00000177706	1.05968	2.311	0.00533558	0.0326748
ENSG00000120329	1.02768	0.774402	0.00534235	0.032701
ENSG00000133067	1.64034	-0.342723	0.00536387	0.0328032
ENSG00000169231	1.69437	5.93221	0.00546569	0.0333576
ENSG00000229980	1.10397	0.646904	0.00549769	0.033496
ENSG00000224321	2.01077	0.861274	0.0055087	0.0335516
ENSG00000182050	2.06352	-0.285677	0.00552545	0.0336266
ENSG00000179954	1.64062	0.26153	0.00560164	0.0339908
ENSG00000186567	1.14091	1.36035	0.00562774	0.0341029
ENSG00000173212	1.81873	1.08993	0.00565679	0.0342212
ENSG00000266401	1.54665	1.88587	0.00567842	0.0342942
ENSG00000249795	1.00005	0.426259	0.00573609	0.0345959
ENSG00000165832	1.01334	5.0363	0.00582705	0.0350503
ENSG00000196787	1.43015	2.54342	0.00589773	0.0354042
ENSG00000138152	1.10234	2.78782	0.00591287	0.0354832
ENSG00000118503	1.04859	3.8303	0.00592137	0.0354985
ENSG00000186088	1.90208	0.18091	0.00592893	0.035532
ENSG00000230836	1.32131	0.98598	0.00597767	0.0357762
ENSG00000134531	1.43754	5.28039	0.00600387	0.0359211
ENSG00000253547	1.1148	3.19156	0.00605323	0.0360979
ENSG00000130653	1.06367	0.302903	0.0060782	0.0362328
ENSG00000213859	1.00342	3.9669	0.00609193	0.0362786
ENSG00000084453	1.03575	3.68995	0.00610885	0.036331
ENSG00000175175	1.08947	2.03279	0.00611086	0.036331
ENSG00000119508	1.44546	-0.135071	0.00615417	0.0365178
ENSG00000233343	1.04264	1.23124	0.00618304	0.0366392
ENSG00000259345	1.68182	1.88633	0.00622669	0.0367879
ENSG00000226251	2.03185	0.721479	0.00624149	0.0368382
ENSG00000180537	1.01696	3.57874	0.00629046	0.0370792
ENSG00000113389	2.31452	-0.418494	0.00635738	0.0373574
ENSG00000179743	1.10469	1.41961	0.00635849	0.0373574
ENSG00000272841	1.137	1.42081	0.00641066	0.0376269
ENSG00000105808	1.18168	0.842484	0.00642268	0.0376606
ENSG00000132932	1.80078	1.55161	0.00655665	0.0382824
ENSG00000047644	1.02014	2.73626	0.00662927	0.0386035
ENSG00000181381	1.0903	0.955851	0.00666723	0.0387399
ENSG00000225077	1.30954	1.72017	0.00687809	0.0397463
ENSG00000108830	1.16022	-0.133137	0.00688391	0.0397604
ENSG00000073464	1.08177	2.98439	0.00691784	0.0399116
ENSG00000139832	1.07864	2.60333	0.0069557	0.0400983
ENSG00000088340	1.23024	1.31984	0.00696965	0.040146
ENSG00000138449	2.04084	0.276784	0.0069903	0.0402262
ENSG00000186710	1.24314	-0.0387146	0.00703678	0.0404418
ENSG00000101928	1.09039	5.54604	0.00710038	0.0406899
ENSG00000244144	1.06448	0.111699	0.00711197	0.0407336
ENSG00000171759	1.51821	3.95055	0.00717929	0.0410634
ENSG00000159388	1.37841	3.33938	0.00718698	0.0410943
ENSG00000079156	1.53817	-0.316869	0.00723156	0.0412834
ENSG00000139200	1.59889	2.13434	0.00725349	0.0413822
ENSG00000162733	1.04022	1.72407	0.00737414	0.0418576
ENSG00000228742	1.08866	5.13095	0.00740832	0.0419835
ENSG00000125798	1.02887	3.23185	0.00747489	0.042269
ENSG00000132639	1.56621	0.894442	0.00751251	0.0424415
ENSG00000157150	1.12147	3.22584	0.00756736	0.0426708
ENSG00000153234	1.19569	-0.0429744	0.00761661	0.0428229
ENSG00000143878	1.25832	7.50411	0.00773039	0.0433448
ENSG00000173926	1.09297	0.438408	0.0078084	0.0436866
ENSG00000167549	1.01476	1.33793	0.0078804	0.0440208
ENSG00000160801	1.12009	1.86383	0.00809244	0.0449811
ENSG00000260282	1.0541	2.24134	0.00813336	0.0451526
ENSG00000114646	1.29133	0.611975	0.00816391	0.0452802
ENSG00000260963	1.21611	1.54588	0.00823812	0.0455829
ENSG00000144481	1.25105	2.47394	0.00826464	0.0456976
ENSG00000272081	1.12232	-0.316116	0.00828024	0.0457697
ENSG00000270704	1.06038	0.204159	0.00830965	0.0458757
ENSG00000138642	1.27621	0.0437083	0.00841352	0.0462924
ENSG00000149809	1.08202	5.5547	0.0085392	0.0468259
ENSG00000128311	1.01088	3.4859	0.00854996	0.0468706
ENSG00000167191	1.23859	6.40095	0.00867467	0.0474115
ENSG00000249166	1.38739	0.697235	0.00897714	0.0486621
ENSG00000273456	1.17674	-0.306637	0.00914726	0.0493903
ENSG00000230314	1.01771	-0.156224	0.00921013	0.0496401

## Sheet: Supplementary Table S6D
Supplementary Table S6D. List of genes downregulated between HEC1B cells treated with negative control (NC) siRNA and SETD8 siRNA
Ensembl gene ID	logFC	logCPM	P-value	FDR
ENSG00000183955	-2.36618	4.28782	3.18419e-31	5.71148e-27
ENSG00000115594	-1.91951	7.6486	5.58533e-23	9.10764e-20
ENSG00000232531	-2.44127	2.00585	5.20201e-20	5.48874e-17
ENSG00000106003	-1.91474	5.56282	5.88823e-16	2.85452e-13
ENSG00000120645	-2.27822	1.30277	9.30455e-15	3.40604e-12
ENSG00000215417	-2.05454	2.4294	3.23425e-13	7.53413e-11
ENSG00000140451	-1.8219	3.83832	5.98189e-13	1.34121e-10
ENSG00000176641	-2.34032	0.796755	1.89952e-11	2.91212e-09
ENSG00000230803	-2.29312	0.650537	8.01559e-11	9.91556e-09
ENSG00000046647	-1.44386	2.66573	9.00394e-11	1.09866e-08
ENSG00000204946	-1.36137	4.08512	5.62127e-10	5.63289e-08
ENSG00000184226	-1.98026	2.43801	8.68391e-10	8.1272e-08
ENSG00000175538	-1.41956	5.90879	9.20356e-10	8.5095e-08
ENSG00000267025	-1.89275	0.825781	1.02769e-09	9.12558e-08
ENSG00000166415	-1.71173	4.95009	1.14614e-09	9.97263e-08
ENSG00000147223	-2.75334	1.94751	5.17884e-09	3.76085e-07
ENSG00000266709	-1.96601	5.5438	6.48127e-09	4.47133e-07
ENSG00000149591	-1.85601	2.29783	1.54992e-08	9.29794e-07
ENSG00000140450	-1.56409	2.42089	2.61725e-08	1.45794e-06
ENSG00000170310	-1.15432	3.48558	6.49443e-08	3.28142e-06
ENSG00000157240	-1.16022	6.66375	6.58268e-08	3.29814e-06
ENSG00000071575	-1.26216	3.98562	7.04024e-08	3.5078e-06
ENSG00000243352	-2.28219	3.37816	7.35548e-08	3.65471e-06
ENSG00000188206	-1.38476	2.41467	8.42677e-08	4.08516e-06
ENSG00000114423	-1.24372	4.34791	9.43523e-08	4.45368e-06
ENSG00000101162	-1.6931	0.5366	1.3301e-07	5.80487e-06
ENSG00000220785	-1.38289	2.37921	1.36914e-07	5.94629e-06
ENSG00000171962	-1.85242	2.03091	1.99504e-07	8.18879e-06
ENSG00000163818	-1.37945	4.08309	2.51925e-07	9.84485e-06
ENSG00000157353	-1.12184	3.80594	3.09116e-07	1.17971e-05
ENSG00000048471	-1.19617	5.28871	3.36795e-07	1.26119e-05
ENSG00000239665	-1.1411	3.44251	3.51022e-07	1.2982e-05
ENSG00000176714	2.51859	1.85659	4.66241e-07	1.6495e-05
ENSG00000111913	-2.06304	-0.0337669	6.1e-16	1.67685e-05
ENSG00000153832	-2.04187	2.51655	5.45311e-07	1.88827e-05
ENSG00000184949	-1.3573	2.62584	5.54351e-07	1.91219e-05
ENSG00000228727	-1.76305	0.310355	5.94052e-07	2.02576e-05
ENSG00000138002	-1.64829	4.33752	1.01402e-06	3.17425e-05
ENSG00000154258	-2.14779	-0.371769	1.11655e-06	3.44707e-05
ENSG00000271533	-1.64128	1.03072	1.35251e-06	4.0572e-05
ENSG00000005108	-1.60126	1.78566	1.41337e-06	4.21823e-05
ENSG00000254685	-1.08624	3.52827	1.73202e-06	5.01086e-05
ENSG00000256525	-1.1531	4.16446	1.74351e-06	5.03597e-05
ENSG00000138400	-1.33555	2.1667	1.88935e-06	5.40499e-05
ENSG00000128694	-1.11889	4.15046	1.9871e-06	5.64858e-05
ENSG00000143344	-1.36111	5.42935	2.00749e-06	5.68853e-05
ENSG00000154743	-1.17149	3.32375	2.31971e-06	6.431e-05
ENSG00000148400	-1.22707	5.14077	2.59094e-06	7.0202e-05
ENSG00000126217	-1.40984	2.77475	2.74478e-06	7.40348e-05
ENSG00000187416	-2.2716	3.13077	2.90635e-06	7.73459e-05
ENSG00000141750	-1.28493	1.61437	3.1189e-06	8.23914e-05
ENSG00000272214	-1.65419	1.28556	3.26252e-06	8.57493e-05
ENSG00000124097	-1.56096	0.435252	3.26514e-06	8.57493e-05
ENSG00000112297	-1.12882	2.20596	3.62474e-06	9.40843e-05
ENSG00000165694	-1.00882	3.34191	3.62972e-06	9.40843e-05
ENSG00000172771	-2.1227	0.305424	3.77845e-06	9.74278e-05
ENSG00000163093	-1.10354	3.48434	4.9113e-06	0.000121175
ENSG00000071242	-1.36128	1.91085	5.36926e-06	0.000129796
ENSG00000242588	-1.18954	1.98541	6.67942e-06	0.000156408
ENSG00000160961	-1.20178	2.78591	7.67714e-06	0.000176093
ENSG00000145416	-1.43327	1.82751	8.62996e-06	0.000193494
ENSG00000134285	-1.06404	3.14514	8.7008e-06	0.000194549
ENSG00000229562	-1.03387	2.14914	9.16335e-06	0.000202564
ENSG00000248124	-1.05417	2.84064	9.19989e-06	0.00020265
ENSG00000099994	-1.40453	0.319548	1.02358e-05	0.000220144
ENSG00000163945	-1.03903	3.11188	1.07586e-05	0.000230284
ENSG00000125247	-1.10349	4.19538	1.19185e-05	0.000249746
ENSG00000137492	-1.31678	6.3315	1.35068e-05	0.000278153
ENSG00000266117	-1.66341	0.208257	1.46587e-05	0.000297435
ENSG00000162419	-1.21023	3.63149	1.63686e-05	0.000328049
ENSG00000161912	-1.32155	0.583975	1.78952e-05	0.000354663
ENSG00000111554	-1.03358	3.98779	1.80026e-05	0.000356023
ENSG00000106336	-1.64031	-0.336764	1.85283e-05	0.000365595
ENSG00000213123	-1.56148	0.611205	1.90154e-05	0.000373581
ENSG00000137203	-1.12368	5.48208	1.94307e-05	0.000379661
ENSG00000103175	-1.52045	0.0210339	1.95567e-05	0.000381707
ENSG00000223749	-1.56067	6.83077	2.14665e-05	0.000411813
ENSG00000168970	-1.08251	2.02518	2.2187e-05	0.000423432
ENSG00000260121	-1.12298	1.70558	2.27783e-05	0.000433271
ENSG00000225329	-1.82275	5.46824	2.60177e-05	0.000484107
ENSG00000100271	-1.67067	2.00364	2.62617e-05	0.000488141
ENSG00000234494	-1.11166	2.9186	2.65174e-05	0.000492384
ENSG00000135119	-1.10357	2.28656	2.87372e-05	0.00052331
ENSG00000198035	-1.14587	2.34183	3.04188e-05	0.000551134
ENSG00000253919	-1.27674	3.75586	3.12265e-05	0.000562924
ENSG00000239653	-1.461	0.00900927	3.2635e-05	0.000581882
ENSG00000176896	-1.3923	0.369573	3.39769e-05	0.000603409
ENSG00000133640	-2.04195	1.85084	3.611e-05	0.000633763
ENSG00000207554	-1.47275	0.299157	3.68831e-05	0.000642087
ENSG00000054965	-1.09164	6.4491	3.8536e-05	0.000663132
ENSG00000102547	-1.18316	1.11833	3.88514e-05	0.000666869
ENSG00000215126	-1.0583	2.93888	4.00656e-05	0.000683784
ENSG00000230715	-1.10036	2.1582	4.6263e-05	0.000769063
ENSG00000248560	-1.27331	2.01167	5.02322e-05	0.000822094
ENSG00000249506	-1.32349	1.86769	5.15567e-05	0.00083388
ENSG00000178343	-1.26073	5.61314	5.26294e-05	0.000847408
ENSG00000116138	-1.03956	4.666	5.3015e-05	0.000852088
ENSG00000255561	-1.06258	2.10697	5.34153e-05	0.000857753
ENSG00000168778	-1.17989	4.33643	5.37244e-05	0.000861175
ENSG00000065029	-1.22286	4.45649	5.44782e-05	0.000870213
ENSG00000165646	-1.03263	2.97014	5.56633e-05	0.000882007
ENSG00000259429	-1.34403	0.646287	7.71886e-05	0.00116937
ENSG00000182606	-1.16346	5.90808	7.76049e-05	0.00117369
ENSG00000107984	-1.77454	6.04653	7.92222e-05	0.00119413
ENSG00000269113	-1.33195	5.17827	8.07945e-05	0.00121594
ENSG00000258395	-1.34545	0.195794	8.7551e-05	0.00129785
ENSG00000169554	-1.19271	5.91963	9.39298e-05	0.0013844
ENSG00000162600	-1.28748	4.02152	9.45551e-05	0.00139133
ENSG00000230124	-1.03855	1.74335	9.84692e-05	0.00143714
ENSG00000236029	-1.46147	1.73869	0.000100271	0.00145703
ENSG00000159496	-1.60272	-0.118444	0.000104844	0.00150327
ENSG00000205212	-1.21357	1.26566	0.00010764	0.0015364
ENSG00000227972	-1.5846	1.33625	0.000111185	0.00157888
ENSG00000231595	-1.35825	0.359393	0.000111262	0.00157888
ENSG00000262333	-1.1028	1.01467	0.000112478	0.00159487
ENSG00000185963	-1.13773	5.42566	0.00012144	0.0016978
ENSG00000270605	-1.20222	1.13055	0.000125693	0.00174772
ENSG00000177640	-1.56352	1.31107	0.000134101	0.00184461
ENSG00000226180	-1.24376	0.891666	0.00013642	0.00187219
ENSG00000152380	-1.1754	0.909659	0.000137572	0.00188225
ENSG00000204169	-1.1082	1.09546	0.000140475	0.00191904
ENSG00000152582	-1.46697	1.78079	0.000142538	0.00194278
ENSG00000107020	-1.26051	2.34494	0.000152008	0.00205314
ENSG00000231240	-1.39335	0.274575	0.000155376	0.00209076
ENSG00000245156	-1.48803	-0.205335	0.000158754	0.00212347
ENSG00000120049	-1.25286	0.843346	0.00017953	0.00234199
ENSG00000166762	-1.39968	2.12278	0.000215814	0.00270136
ENSG00000066735	-1.3263	5.47666	0.000216358	0.00270629
ENSG00000114841	-1.21895	1.98928	0.00021752	0.00271514
ENSG00000227921	-1.31657	2.15887	0.000221083	0.00274813
ENSG00000080608	-1.00279	5.11184	0.000247097	0.00297862
ENSG00000237943	-1.02646	1.92942	0.000262156	0.00313277
ENSG00000181355	-1.03743	1.8853	0.000266629	0.00317673
ENSG00000109063	-1.01361	1.93524	0.000287131	0.00338388
ENSG00000198064	-1.07661	1.2409	0.000294286	0.00344781
ENSG00000153976	-1.37849	1.32	0.00029774	0.00348146
ENSG00000198937	-1.07902	4.6786	0.000322066	0.00371504
ENSG00000263126	-1.20867	0.591911	0.00032946	0.00377992
ENSG00000260528	-1.00433	1.41538	0.000330464	0.00378756
ENSG00000243679	-1.01875	1.91568	0.000345154	0.00391386
ENSG00000267169	-1.06646	0.822236	0.000350937	0.00396895
ENSG00000118307	-1.61428	1.2267	0.000358716	0.00403657
ENSG00000261208	-1.00537	5.12007	0.000364324	0.00408941
ENSG00000112981	-1.60142	0.199458	0.000393264	0.00436239
ENSG00000228624	-1.12325	0.437908	0.00039588	0.00437786
ENSG00000086570	-1.32161	1.10014	0.0004096	0.00449357
ENSG00000175787	-1.01357	1.71338	0.000431326	0.00468389
ENSG00000214278	-1.01971	1.6877	0.000436483	0.00473063
ENSG00000166343	-1.333	-0.114408	0.000436896	0.00473224
ENSG00000248835	-1.2281	2.05249	0.000444572	0.00479894
ENSG00000137098	-1.4474	0.793046	0.00046043	0.00494191
ENSG00000163617	-1.47496	1.70303	0.000461557	0.0049456
ENSG00000260367	-1.39433	0.716806	0.000475373	0.00506942
ENSG00000228302	-1.51229	-0.159979	0.000492214	0.00521183
ENSG00000224281	-1.13062	0.251672	0.00050824	0.00536253
ENSG00000266930	-1.34812	-0.325802	0.000513868	0.0054046
ENSG00000237792	-1.22118	1.81642	0.000558452	0.00580356
ENSG00000215883	-1.23523	2.90547	0.000559156	0.00580752
ENSG00000273055	-1.27276	0.704259	0.000573244	0.00590258
ENSG00000085760	-1.0276	5.69037	0.000627334	0.00633943
ENSG00000164776	-1.34853	-0.337357	0.000638168	0.00642719
ENSG00000179981	-1.39185	5.37016	0.000655336	0.00656574
ENSG00000236901	-1.00588	1.39341	0.000684233	0.00677323
ENSG00000185020	-1.17508	3.24619	0.000714224	0.00699675
ENSG00000271430	-1.00603	1.04198	0.00071588	0.00700914
ENSG00000185345	-1.13074	0.541363	0.0007213	0.00705451
ENSG00000154529	-1.06356	4.51578	0.000746362	0.00722477
ENSG00000149050	-1.16873	0.489666	0.00074781	0.00723488
ENSG00000244932	-1.04511	0.913247	0.000755471	0.00728606
ENSG00000143924	-1.27145	7.71394	0.000755537	0.00728606
ENSG00000271270	-1.34513	2.82533	0.000782829	0.00748486
ENSG00000180730	-1.04325	5.85657	0.000802926	0.00763226
ENSG00000174514	-1.17443	0.527038	0.000807088	0.00766271
ENSG00000244617	-1.30123	-0.182742	0.000851461	0.00800454
ENSG00000048540	-1.4903	-0.177737	0.000867845	0.0081245
ENSG00000204104	-1.03339	4.99692	0.000963631	0.0088187
ENSG00000198814	-1.03373	1.05023	0.00096536	0.00883002
ENSG00000158006	-1.0484	4.1305	0.00100537	0.00911148
ENSG00000125430	-1.45024	6.29613	0.00104294	0.00934424
ENSG00000168026	-1.28326	2.44914	0.00104816	0.00938163
ENSG00000229670	-1.02692	5.98378	0.00106905	0.00954011
ENSG00000203780	-1.69126	0.0242109	0.00107082	0.00955111
ENSG00000230910	-1.11084	0.341396	0.00108526	0.00965595
ENSG00000222937	-1.21413	0.213692	0.00108661	0.00966312
ENSG00000270101	-1.10104	0.701008	0.001109	0.00981361
ENSG00000116754	-1.04467	7.04645	0.00111631	0.00986369
ENSG00000134146	-1.01486	3.17717	0.00113494	0.00997957
ENSG00000204150	-1.1629	-0.0826447	0.00113948	0.0099994
ENSG00000264469	-1.09444	0.115856	0.00117577	0.0102627
ENSG00000263843	-1.02321	0.983758	0.00122092	0.010554
ENSG00000166323	-1.23878	-0.190472	0.00126101	0.0108223
ENSG00000269979	-1.23937	0.0102467	0.00126431	0.0108455
ENSG00000237015	-1.29759	-0.214179	0.00133634	0.011336
ENSG00000117318	-1.21731	6.23828	0.00146133	0.0121154
ENSG00000114670	-1.15226	2.28835	0.00149177	0.0123365
ENSG00000204410	-1.14577	1.86062	0.00160531	0.0130255
ENSG00000214081	-1.45958	-0.0656789	0.00161357	0.0130784
ENSG00000197182	-1.05905	1.1203	0.00163308	0.0131593
ENSG00000255423	-1.10874	0.016534	0.00169964	0.0135918
ENSG00000238018	-1.28821	0.180502	0.00171411	0.0136893
ENSG00000137845	-1.07544	7.32237	0.00173478	0.0138419
ENSG00000134864	-1.16829	0.58256	0.00175851	0.0140064
ENSG00000147166	-1.2386	0.459954	0.00176186	0.0140268
ENSG00000203709	-1.04447	0.316152	0.00177606	0.0141148
ENSG00000224401	-1.07615	0.0549409	0.00185037	0.0145571
ENSG00000176563	-1.10187	0.0369323	0.00192768	0.0149813
ENSG00000254911	-1.31262	1.13666	0.00196984	0.0152612
ENSG00000184260	-1.28749	-0.399569	0.00215728	0.0164101
ENSG00000205710	-1.16837	-0.269392	0.00220871	0.0166601
ENSG00000157796	-1.01994	4.77189	0.0022435	0.0168799
ENSG00000272191	-1.11944	0.538654	0.00238704	0.0176126
ENSG00000272216	-1.14301	0.776391	0.00246249	0.0180801
ENSG00000181449	-1.01313	2.89244	0.00248242	0.0181892
ENSG00000169682	-1.14099	1.29376	0.00250824	0.018321
ENSG00000183066	-1.21211	-0.0126798	0.00259248	0.0187808
ENSG00000188010	-1.11402	3.712	0.00261994	0.0189492
ENSG00000143458	-1.0661	2.56248	0.00265027	0.0190992
ENSG00000271225	-1.05874	0.430179	0.0026641	0.019156
ENSG00000101384	-1.32355	7.39783	0.00272201	0.0194289
ENSG00000205356	-1.03793	4.34788	0.00273084	0.0194763
ENSG00000230280	-1.21382	-0.0699551	0.00293001	0.0205697
ENSG00000186409	-1.18996	0.281768	0.00295676	0.0207008
ENSG00000203435	-1.04696	0.245802	0.00299188	0.0208893
ENSG00000258552	-1.06257	-0.0289415	0.00316567	0.0218126
ENSG00000244425	-1.17436	0.0251881	0.00318532	0.021916
ENSG00000250391	-1.00785	0.520216	0.00320771	0.0220447
ENSG00000179296	-1.01377	0.0997922	0.00325215	0.0222733
ENSG00000220804	-1.02738	0.424431	0.00331081	0.0225888
ENSG00000117289	-1.79624	4.02933	0.00338188	0.0228909
ENSG00000166086	-1.01923	0.41105	0.0033919	0.0229295
ENSG00000111452	-1.02149	3.63863	0.00371032	0.0246124
ENSG00000180178	-1.21168	3.72278	0.00388725	0.0254845
ENSG00000256061	-1.20372	-0.0499955	0.00394082	0.025751
ENSG00000008083	-1.11846	4.59212	0.004279	0.0274606
ENSG00000175395	-1.22669	2.55525	0.0043288	0.0277306
ENSG00000182196	-1.05764	0.0353173	0.00482339	0.0301769
ENSG00000064199	-1.26145	1.98443	0.00497283	0.030882
ENSG00000273243	-1.07195	-0.112178	0.00497755	0.0308936
ENSG00000231154	-1.13183	-0.182077	0.00520871	0.032062
ENSG00000234184	-1.11667	-0.365971	0.00528739	0.0324683
ENSG00000223745	-1.03124	3.25817	0.00543648	0.0332133
ENSG00000176624	-1.05292	5.22223	0.00566301	0.0342472
ENSG00000213085	-1.1174	-0.199861	0.00584621	0.0351419
ENSG00000248735	-1.04346	0.0766055	0.00625923	0.0369193
ENSG00000204778	-1.01715	0.0660027	0.00642249	0.0376606
ENSG00000205955	-1.00562	0.122444	0.00655862	0.0382824
ENSG00000116885	-1.04263	2.82682	0.00666715	0.0387399
ENSG00000106012	-1.09147	4.84576	0.00687774	0.0397463
ENSG00000129295	-1.05802	1.08655	0.00772579	0.0433328
ENSG00000225028	-1.16911	-0.172502	0.00794913	0.0443494
